# Supplementary material for: Environmentally Friendly Approach to Knoevenagel Condensation of Rhodanine in Choline Chloride: Urea Deep Eutectic Solvent and QSAR Studies on Their Antioxidant Activity
Source: MDPI journal article supplement (doi:10.3390/molecules23081897), 2018-07-29

## **Supplementary data**

**Environmentally friendly approach to Knoevenagel condensation of rhodanine in choline chloride:urea deep eutectic solvent and QSAR studies on their antioxidant activity**

**Maja Molnar<sup>1\*</sup>, Harshad Brahmbhatt<sup>1</sup>, Vesna Rastija<sup>2</sup>, Valentina Pavić<sup>3</sup>, Mario Komar<sup>1</sup>, Maja Karnas<sup>2</sup> and Jurislav Babić<sup>1</sup>**

(Z)-5-(2-methoxybenzylidene)-2-thioxothiazolidin-4-one (2a)

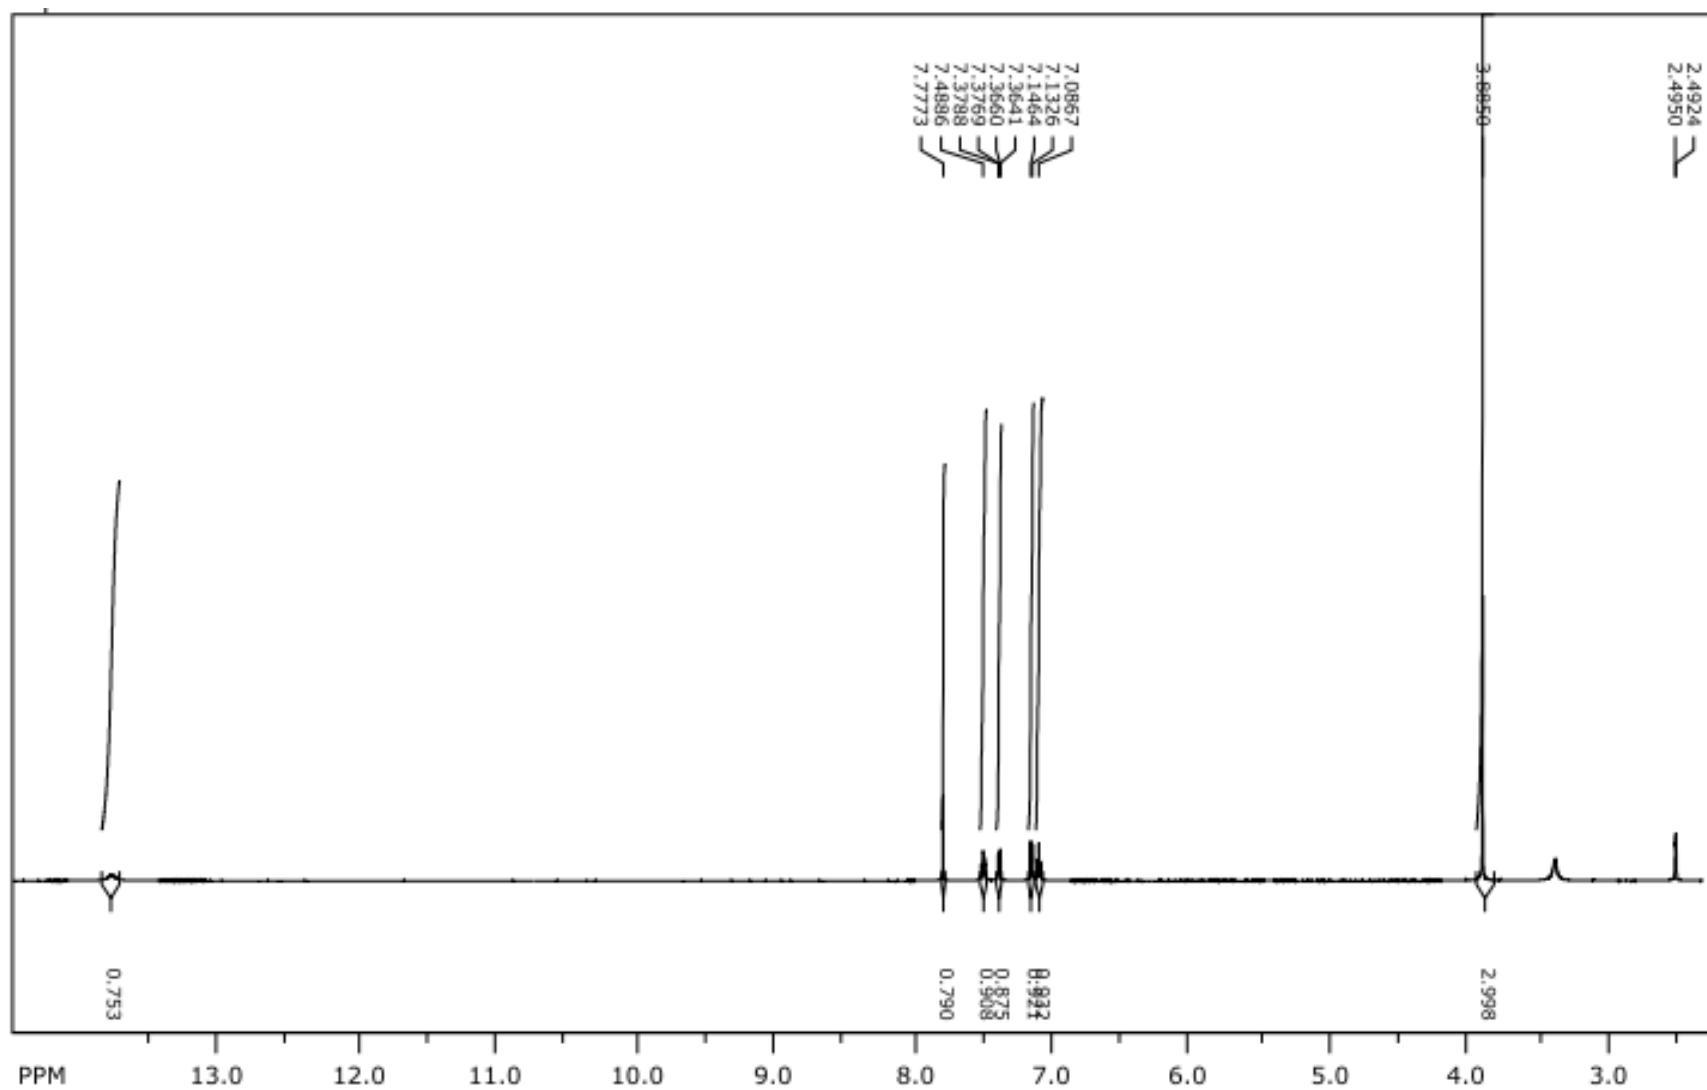

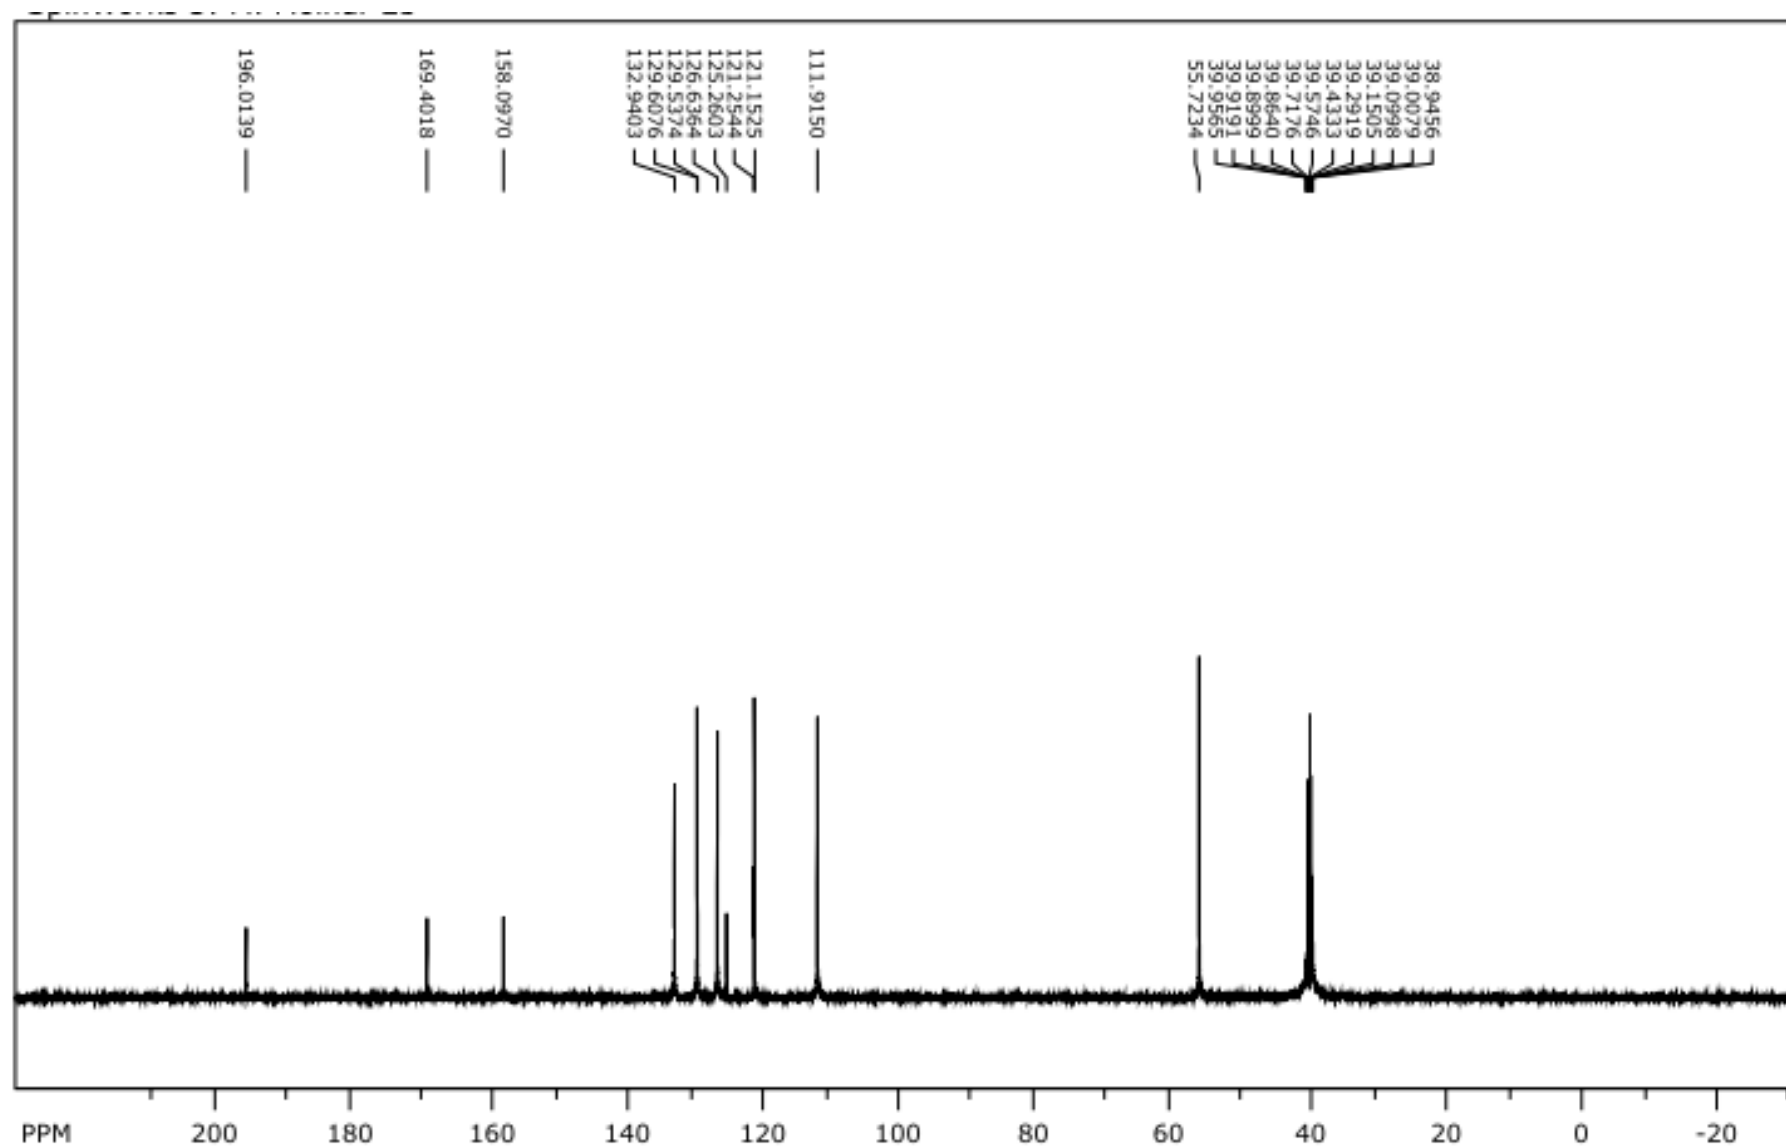

-Q1: 60 MCA scans from Sample 1 (030\_2b) of 030\_2b.wiff (Turbo Spray)

Max. 1.3e7 cps.

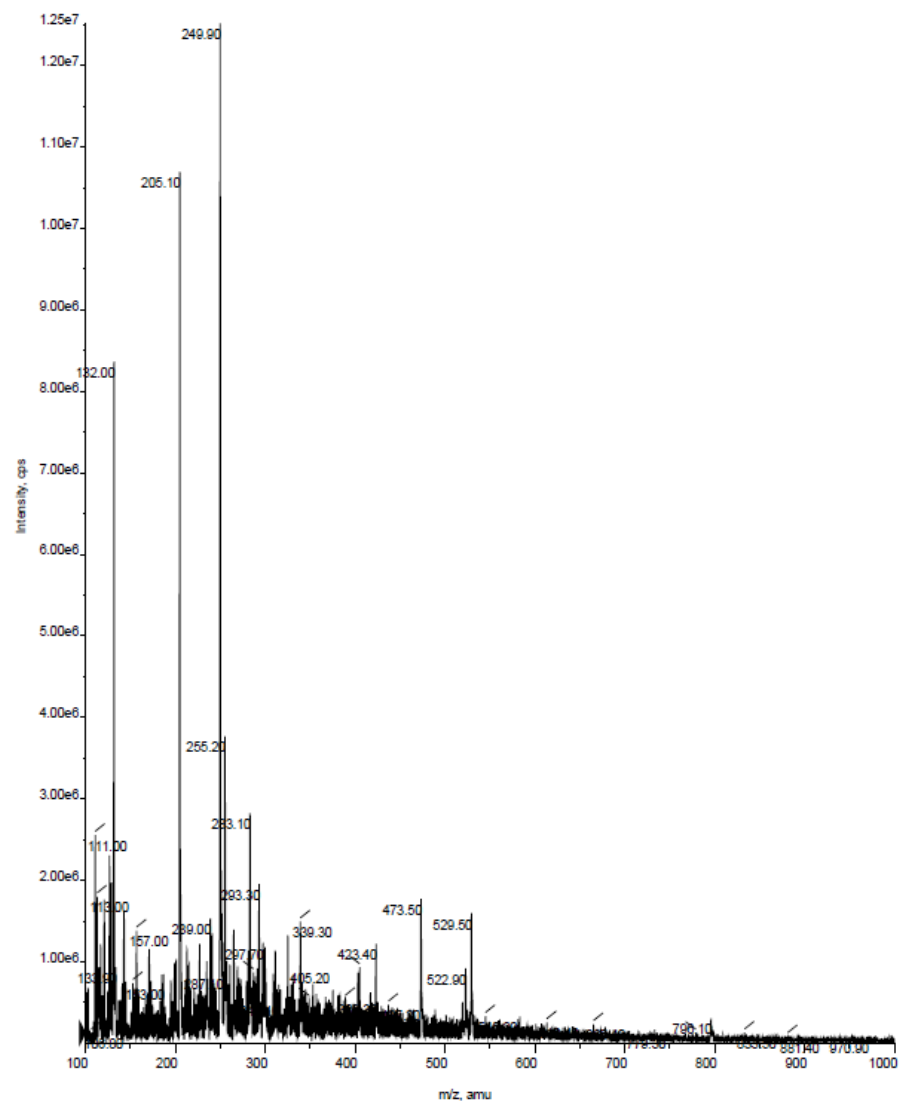

(Z)-5-(4-(dimethylamino)benzylidene)-2-thioxothiazolidin-4-one (2b)

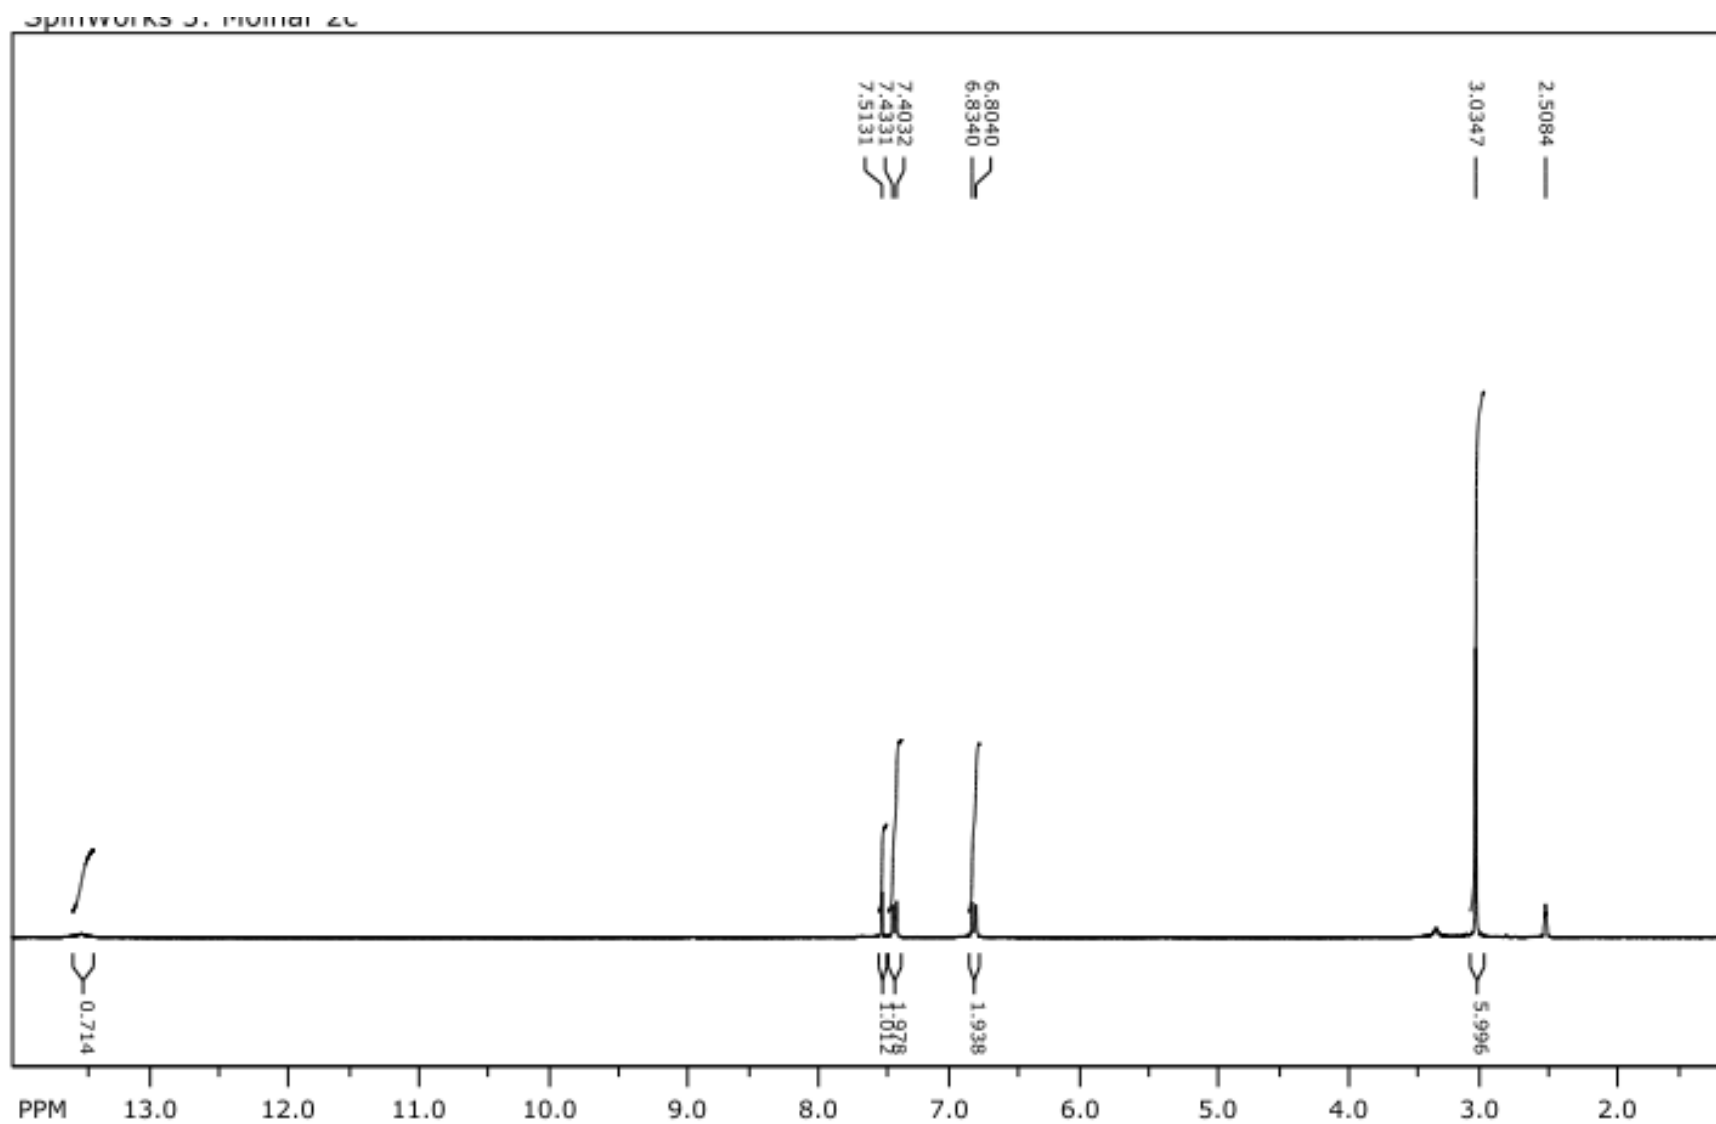

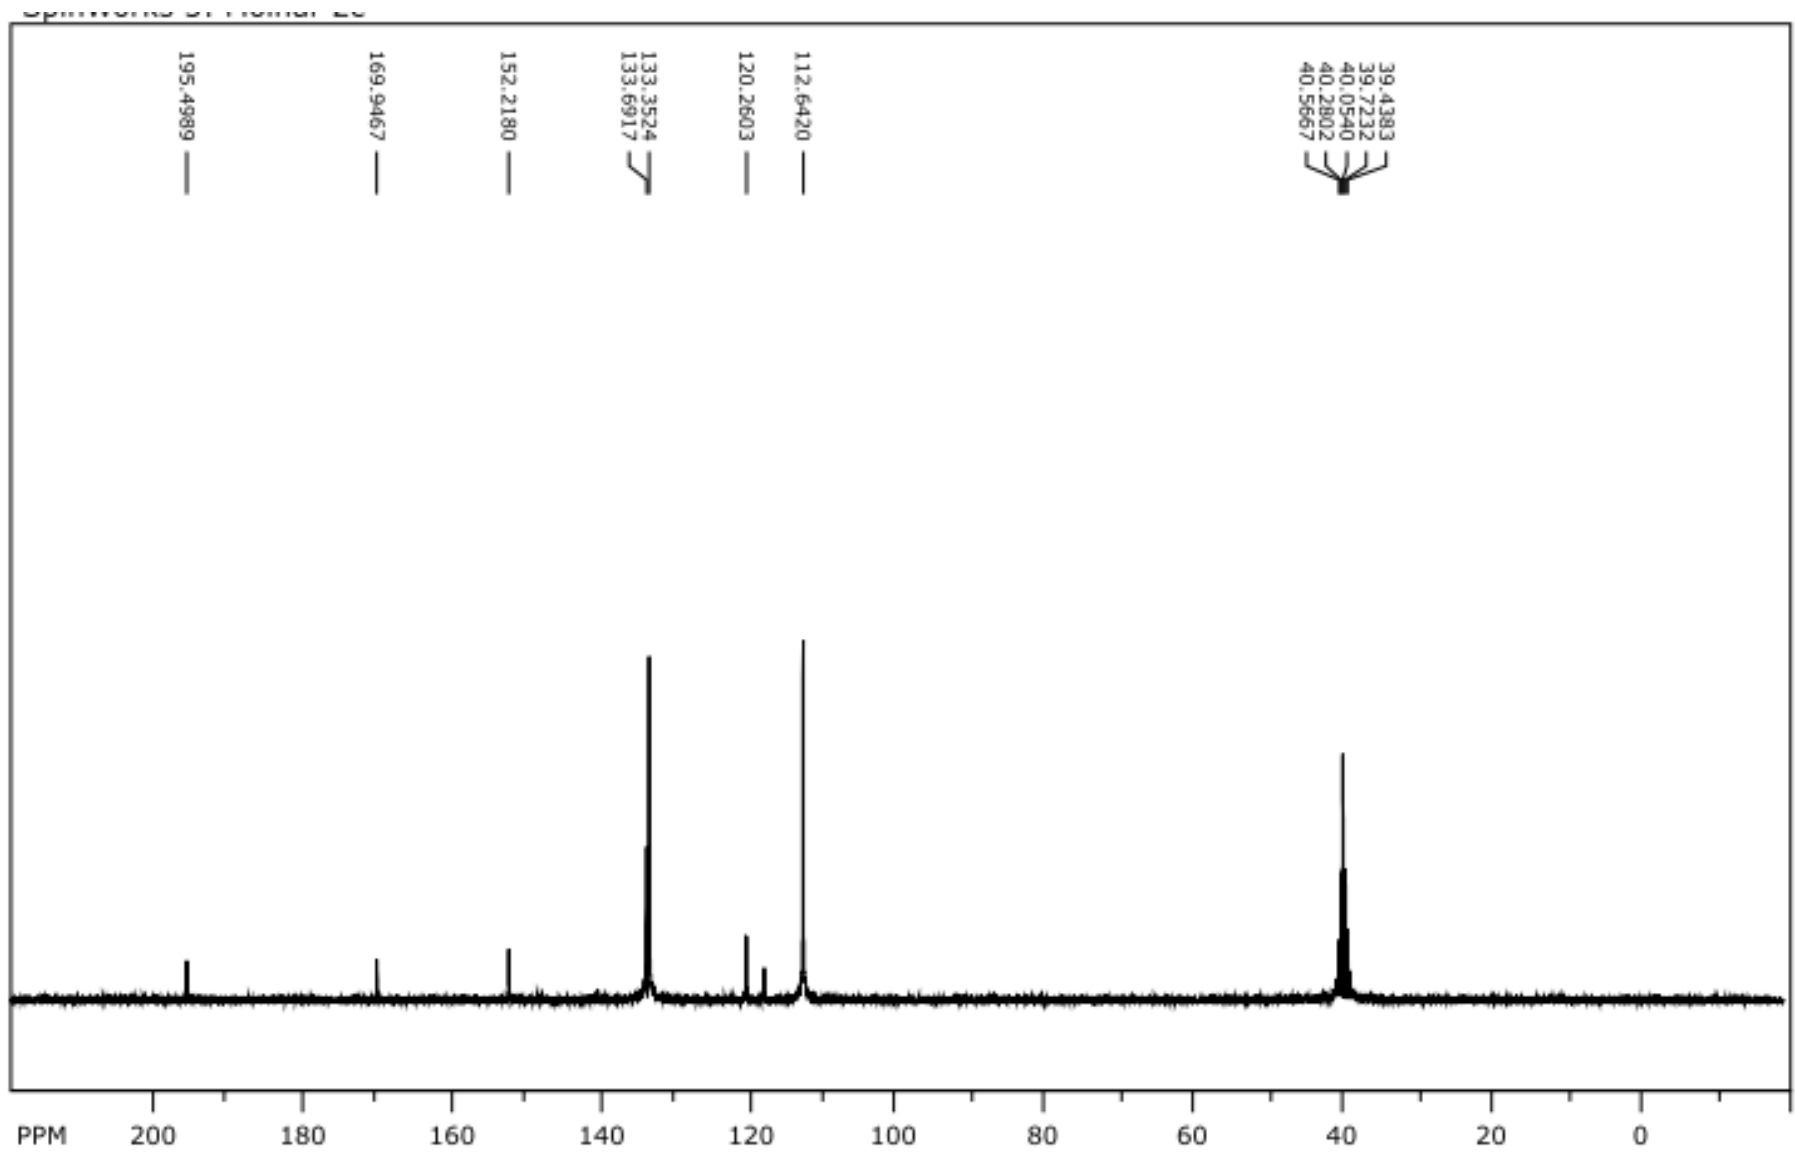

-Q1: 60 MCA scans from Sample 1 (032\_2c) of 032\_2c.wiff (Turbo Spray)

Max. 1.6e7 cps.

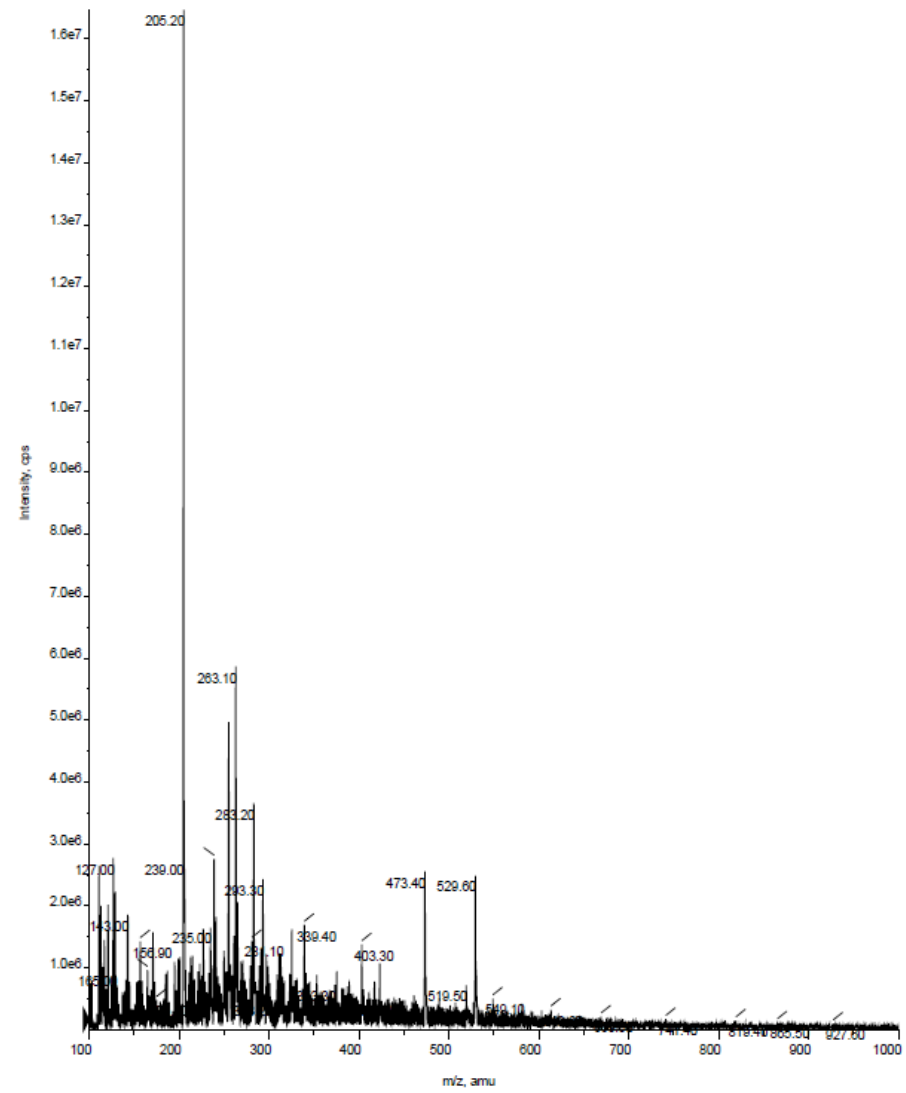

(Z)-5-(3-methoxybenzylidene)-2-thioxothiazolidin-4-one (2c)

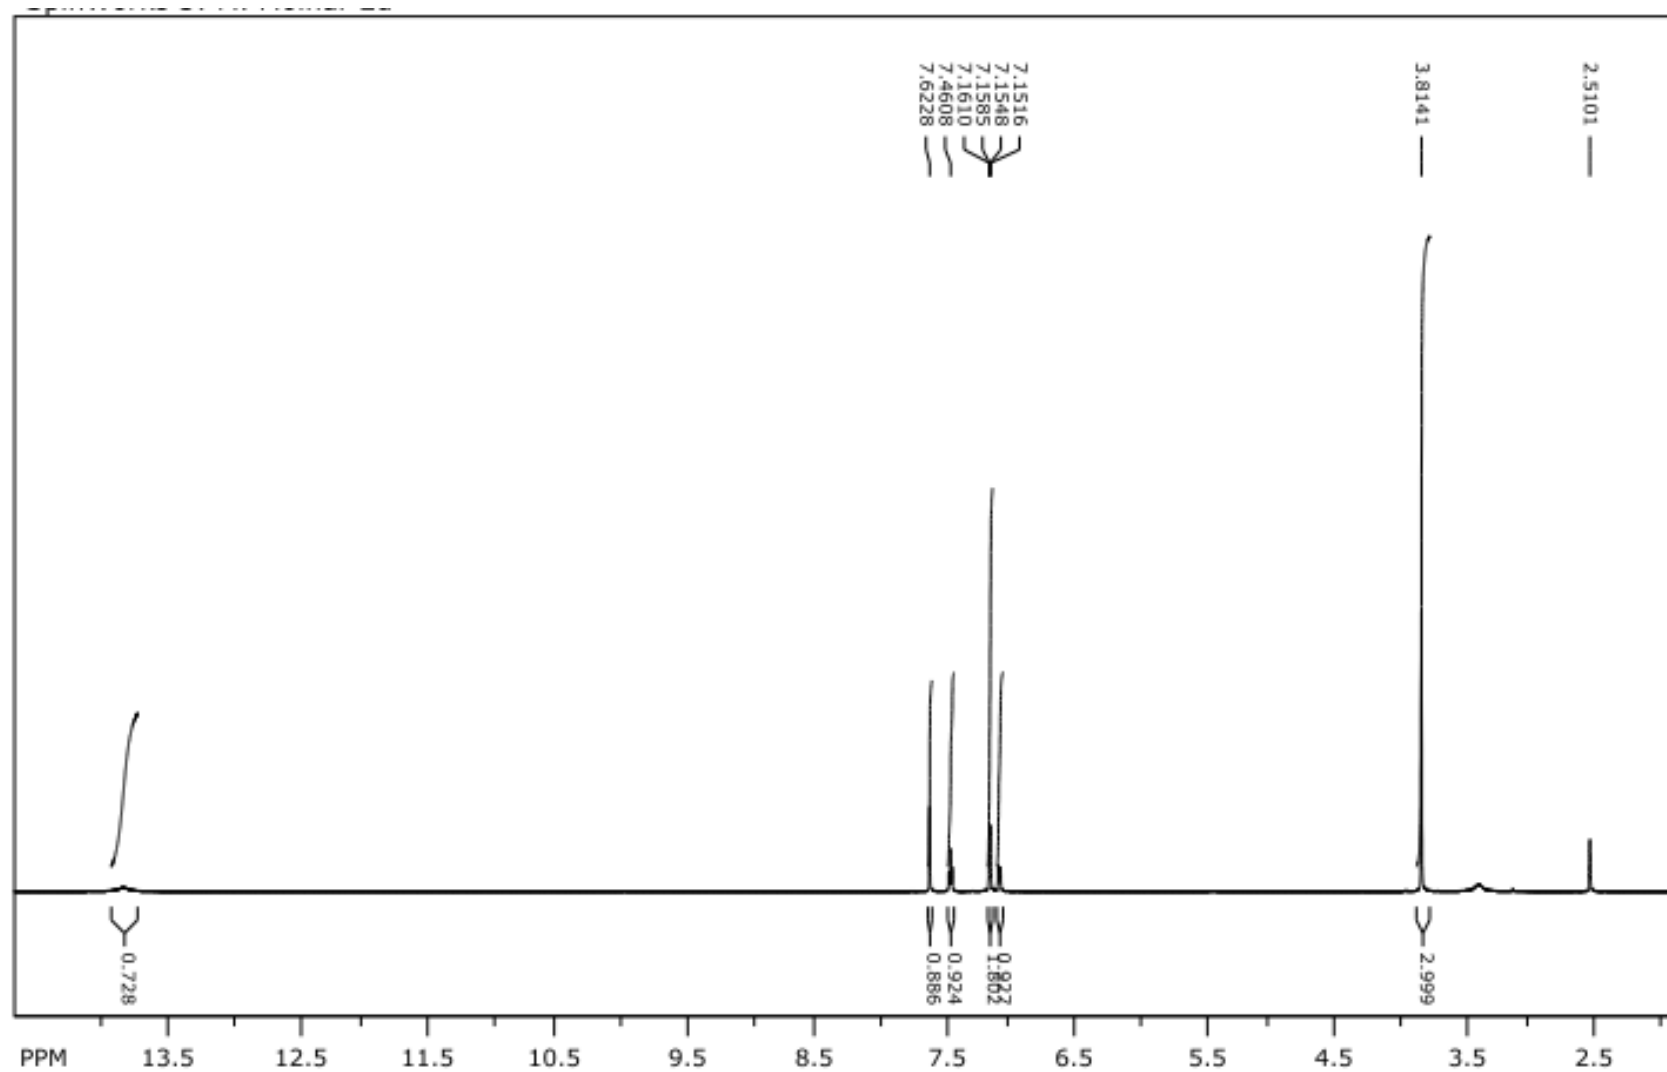



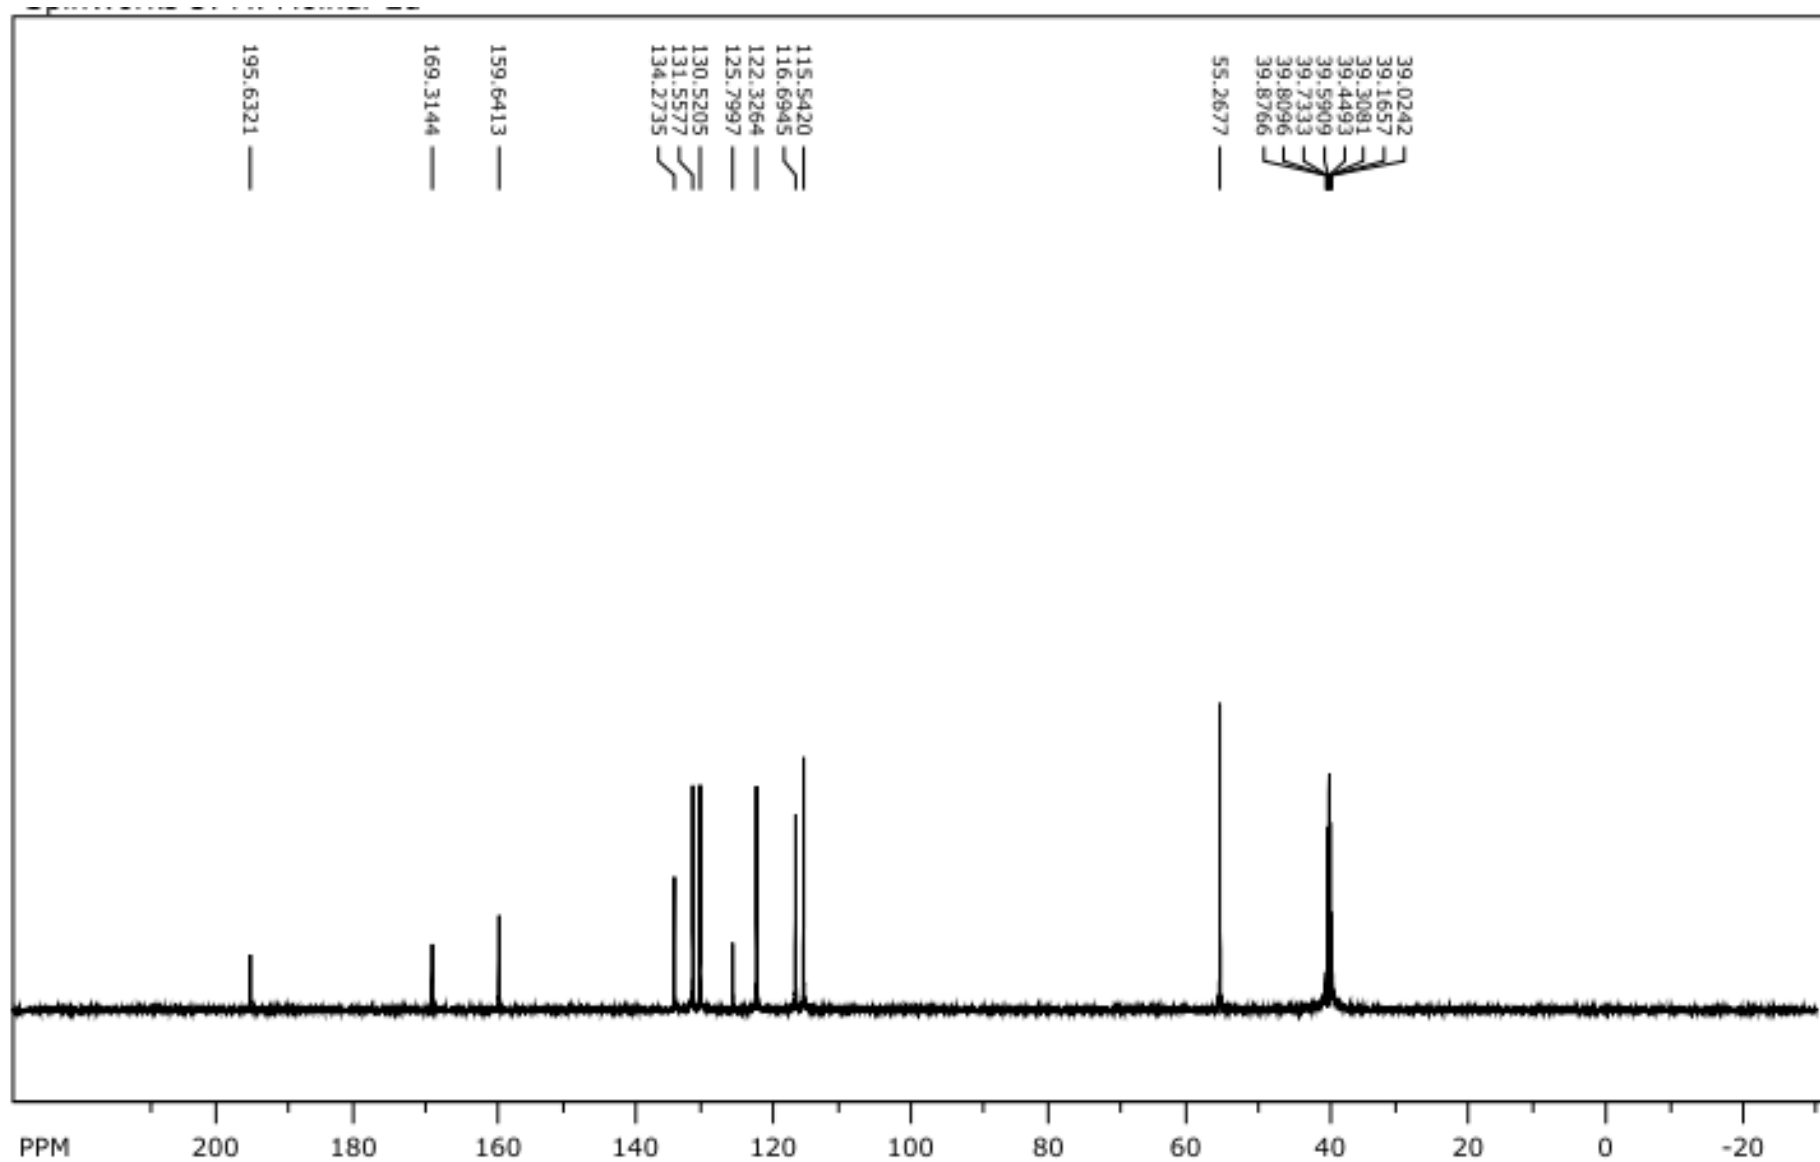

-Q1: 60 MCA scans from Sample 1 (034\_2d) of 034\_2d.wiff (Turbo Spray)

Max. 2.1e7 cps.

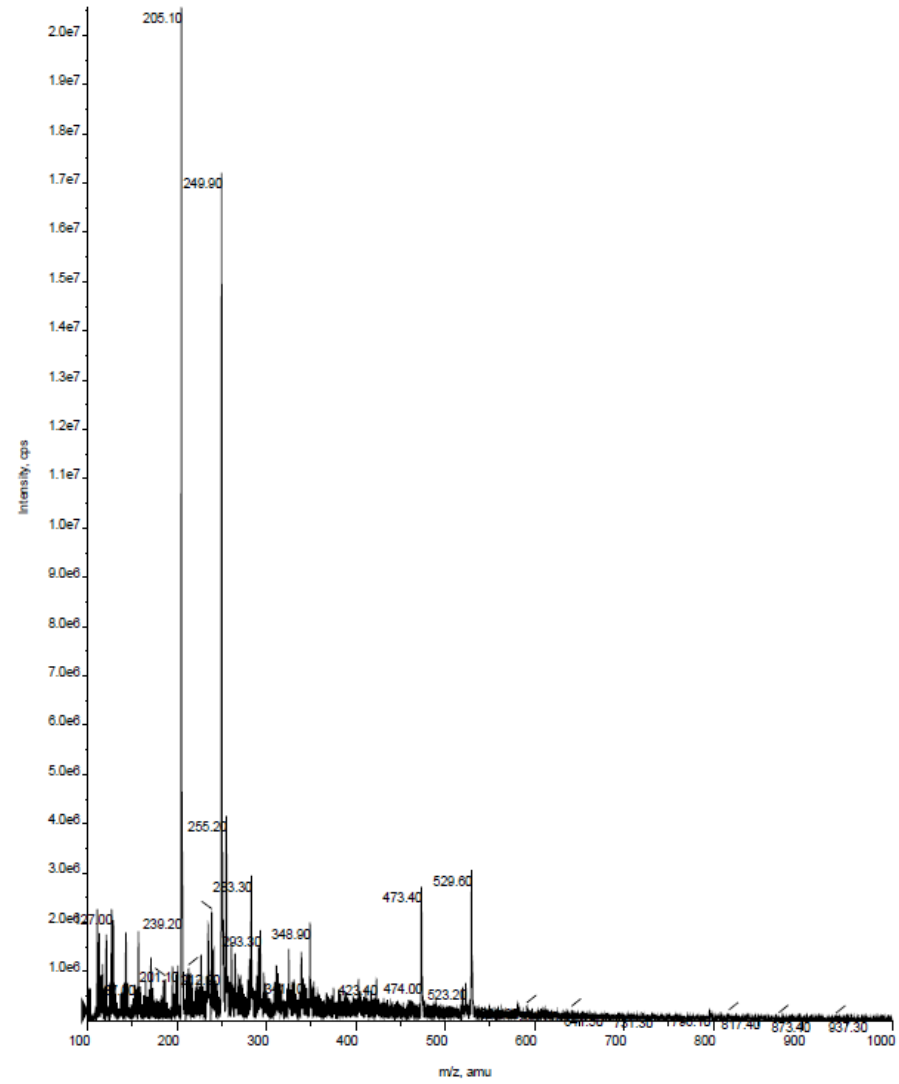

(Z)-2-thioxo-5-(3,4,5-trimethoxybenzylidene)thiazolidin-4-one (2d)

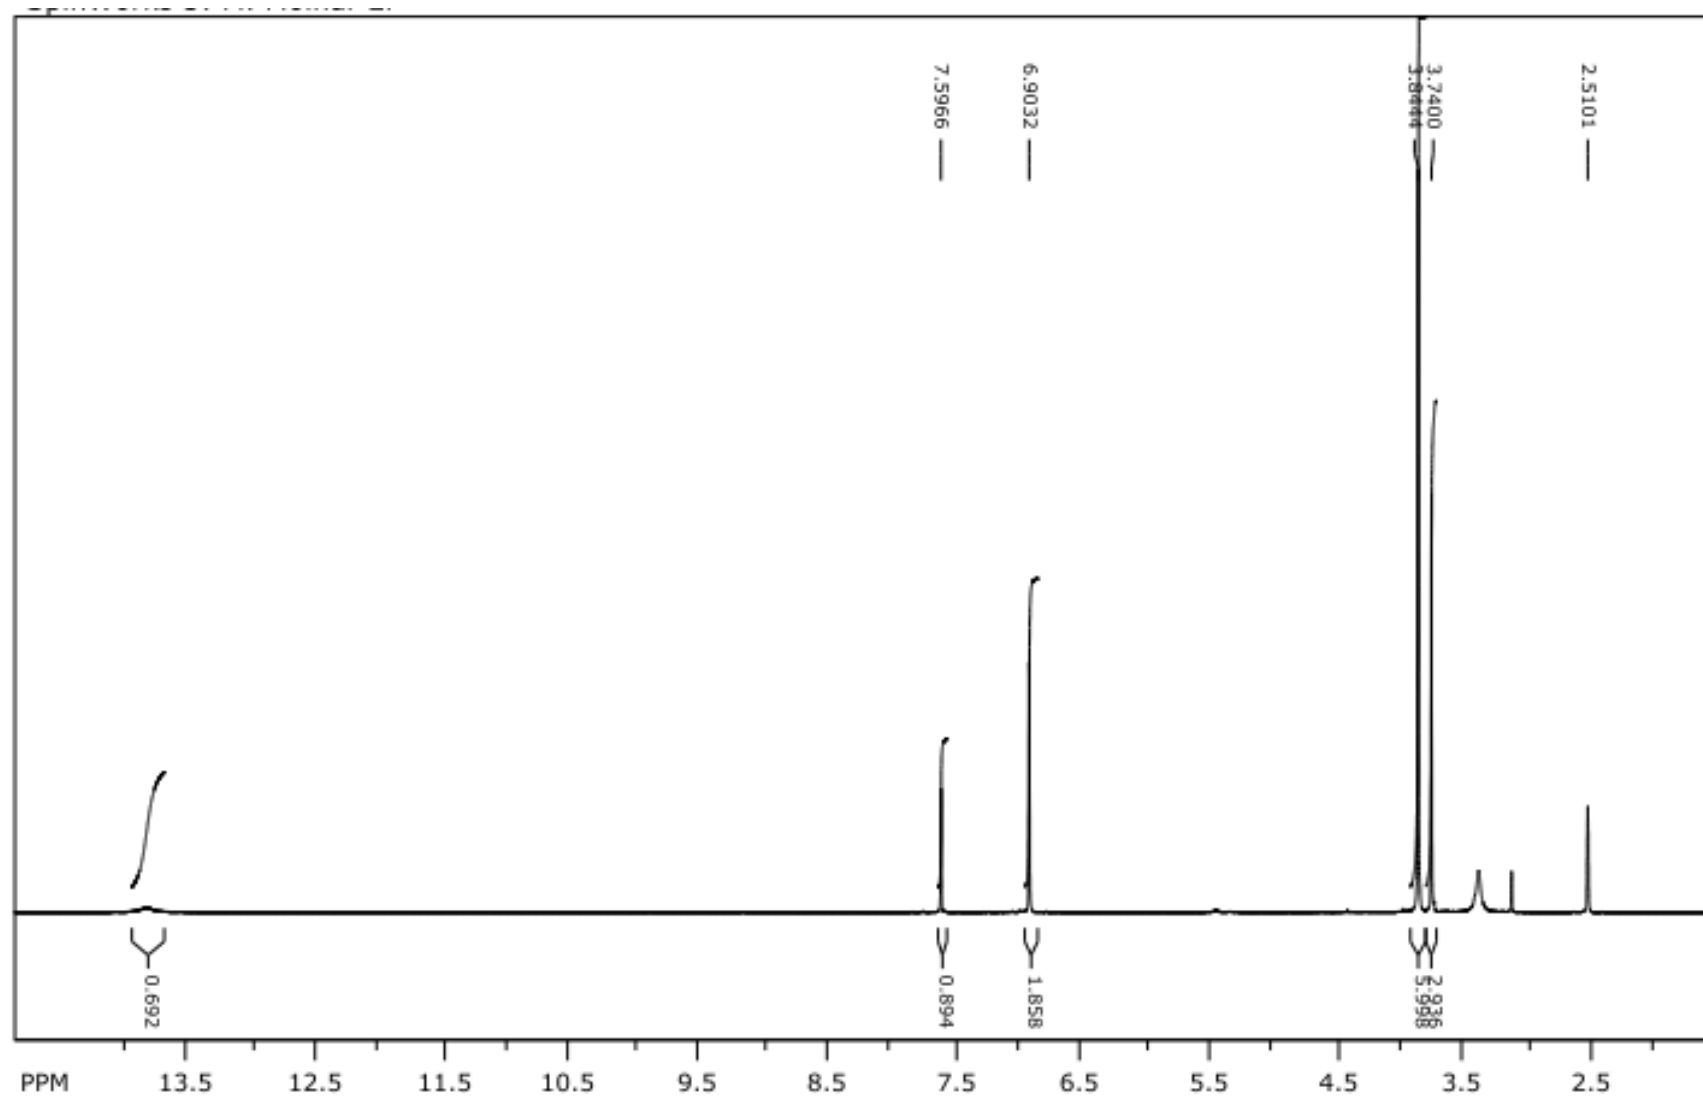

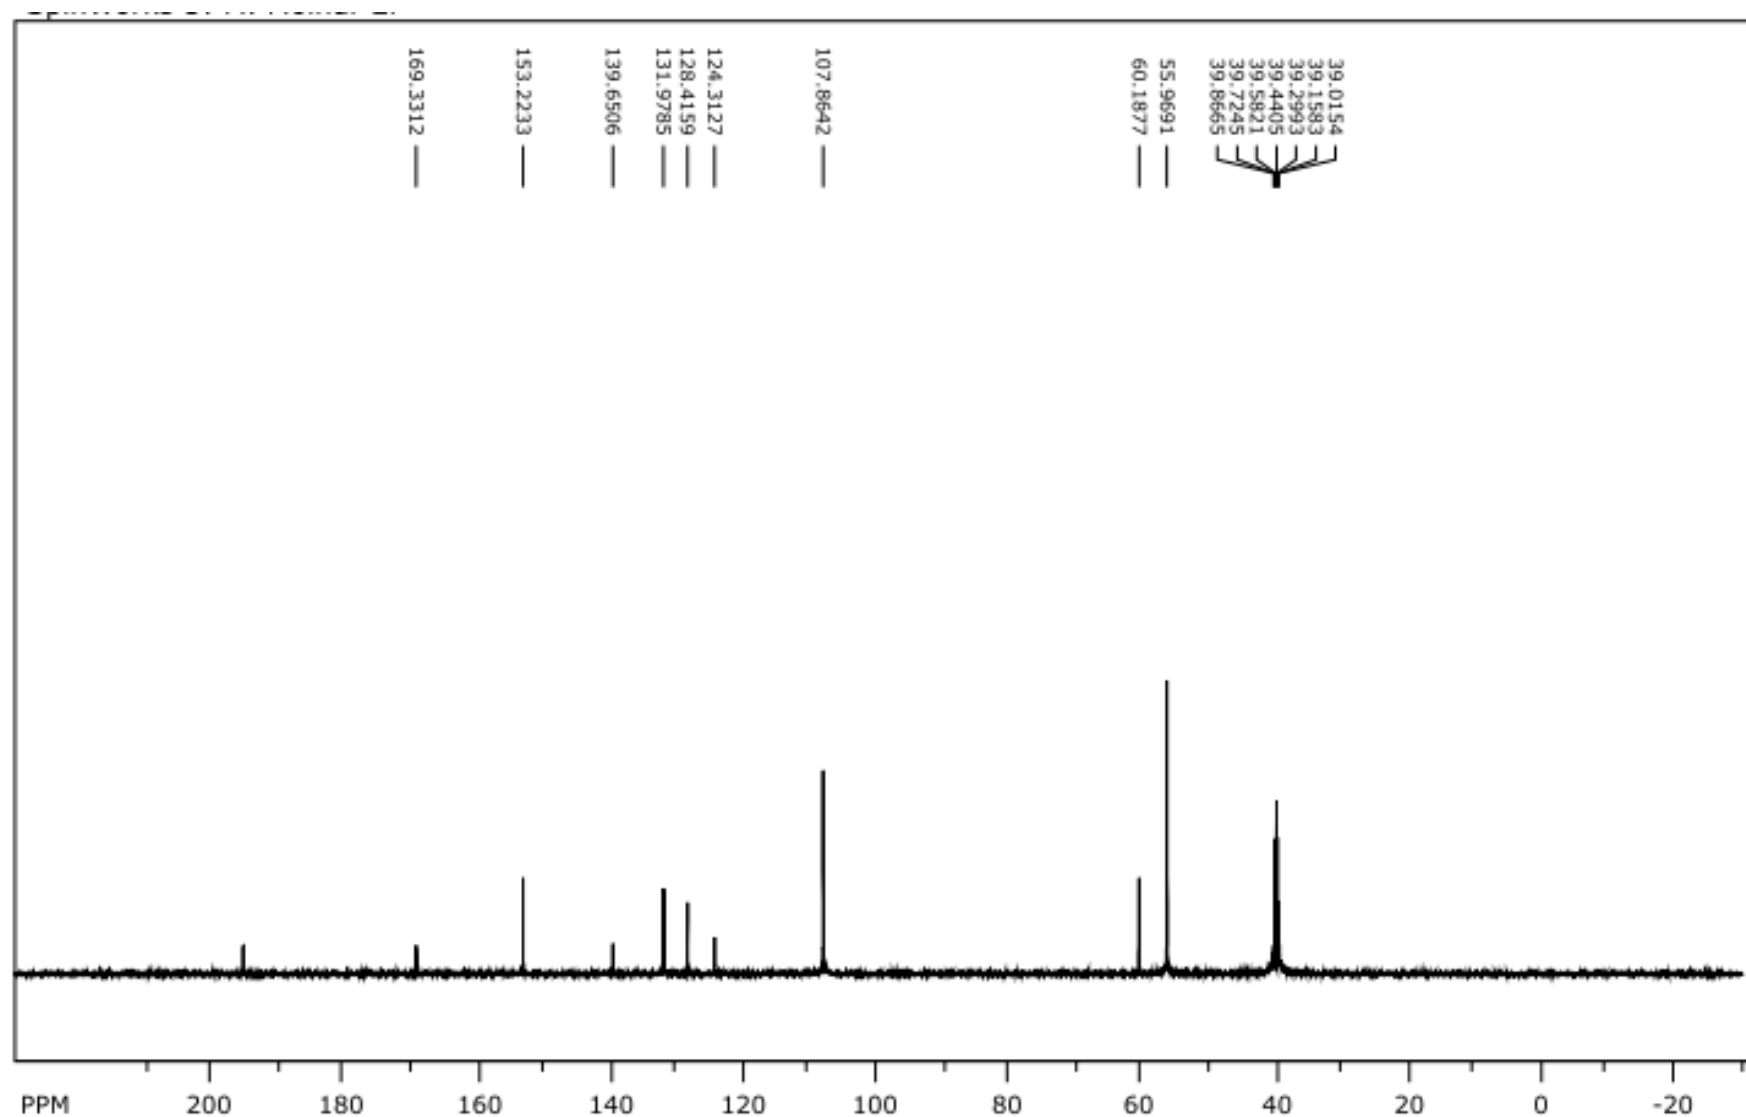

-Q1: 60 MCA scans from Sample 1 (036\_2f) of 036\_2f.wiff (Turbo Spray)

Max: 2.7e7 cps.

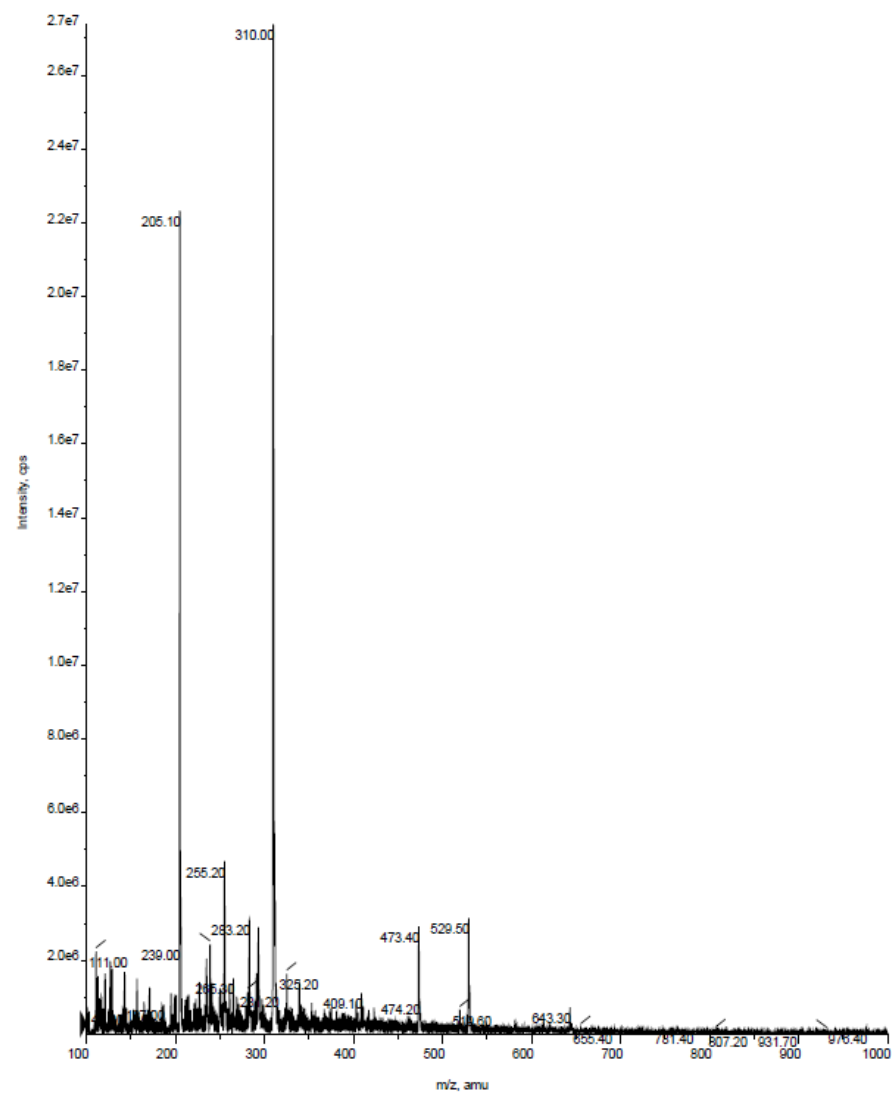

(Z)-5-(3,4-dihydroxybenzylidene)-2-thioxothiazolidin-4-one (2e)

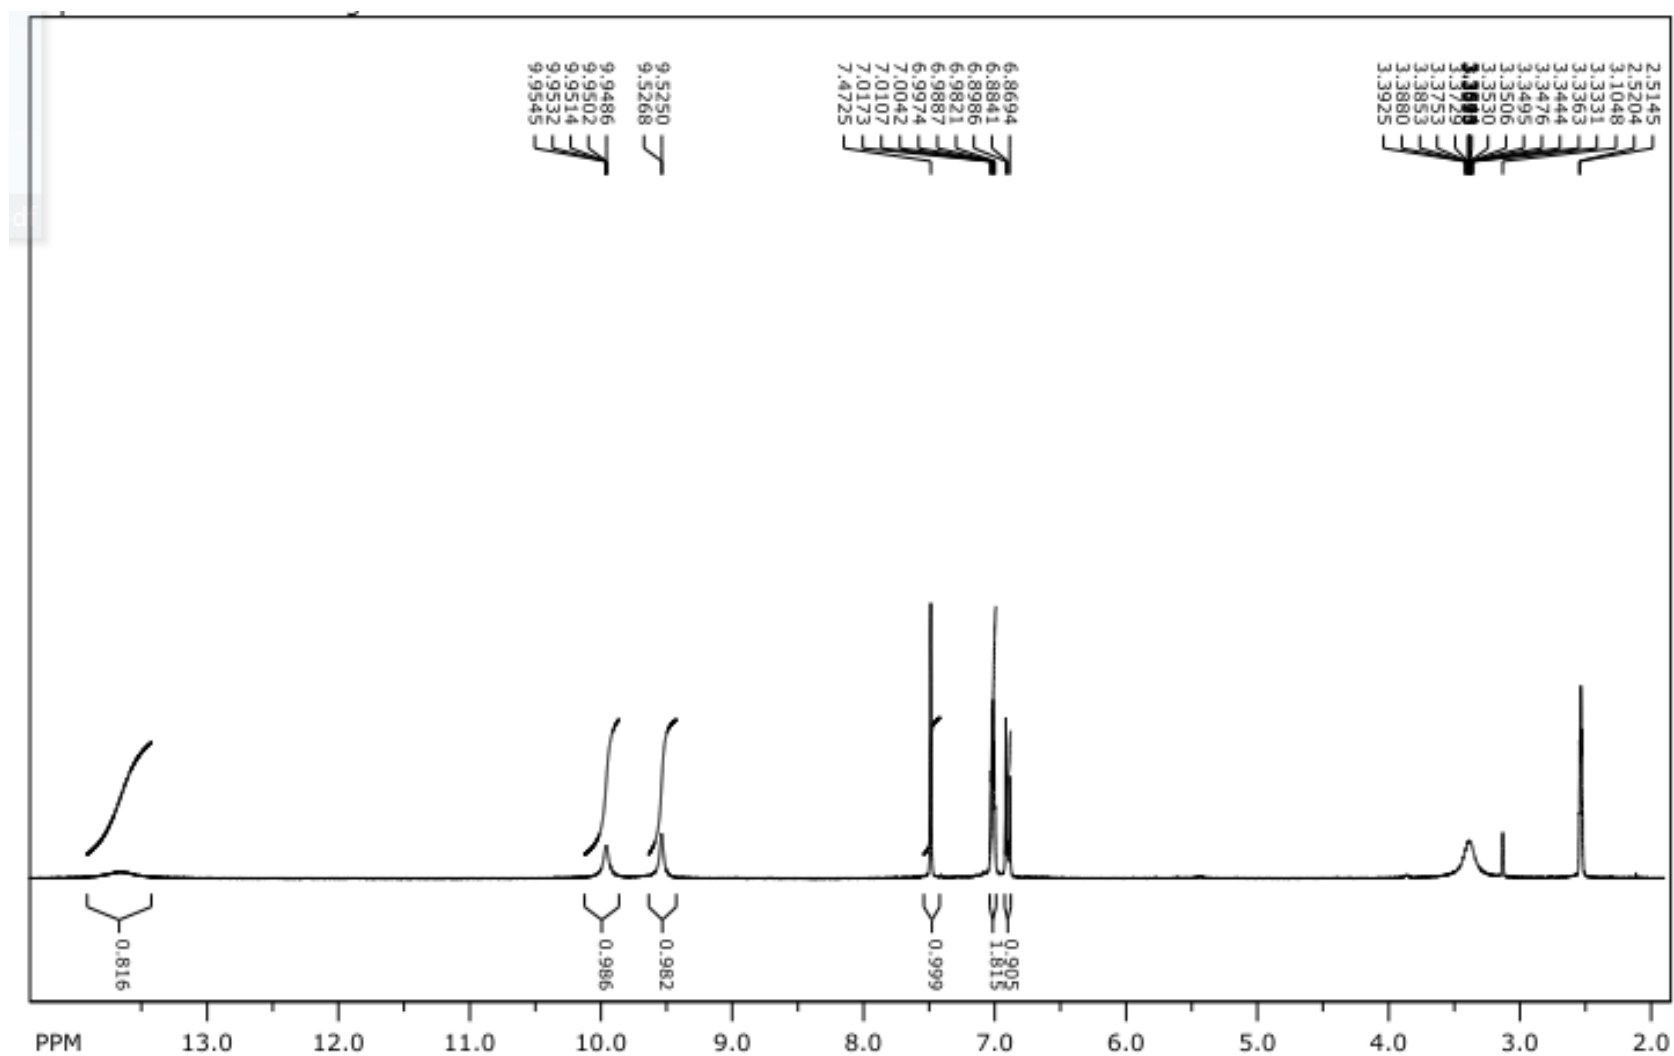

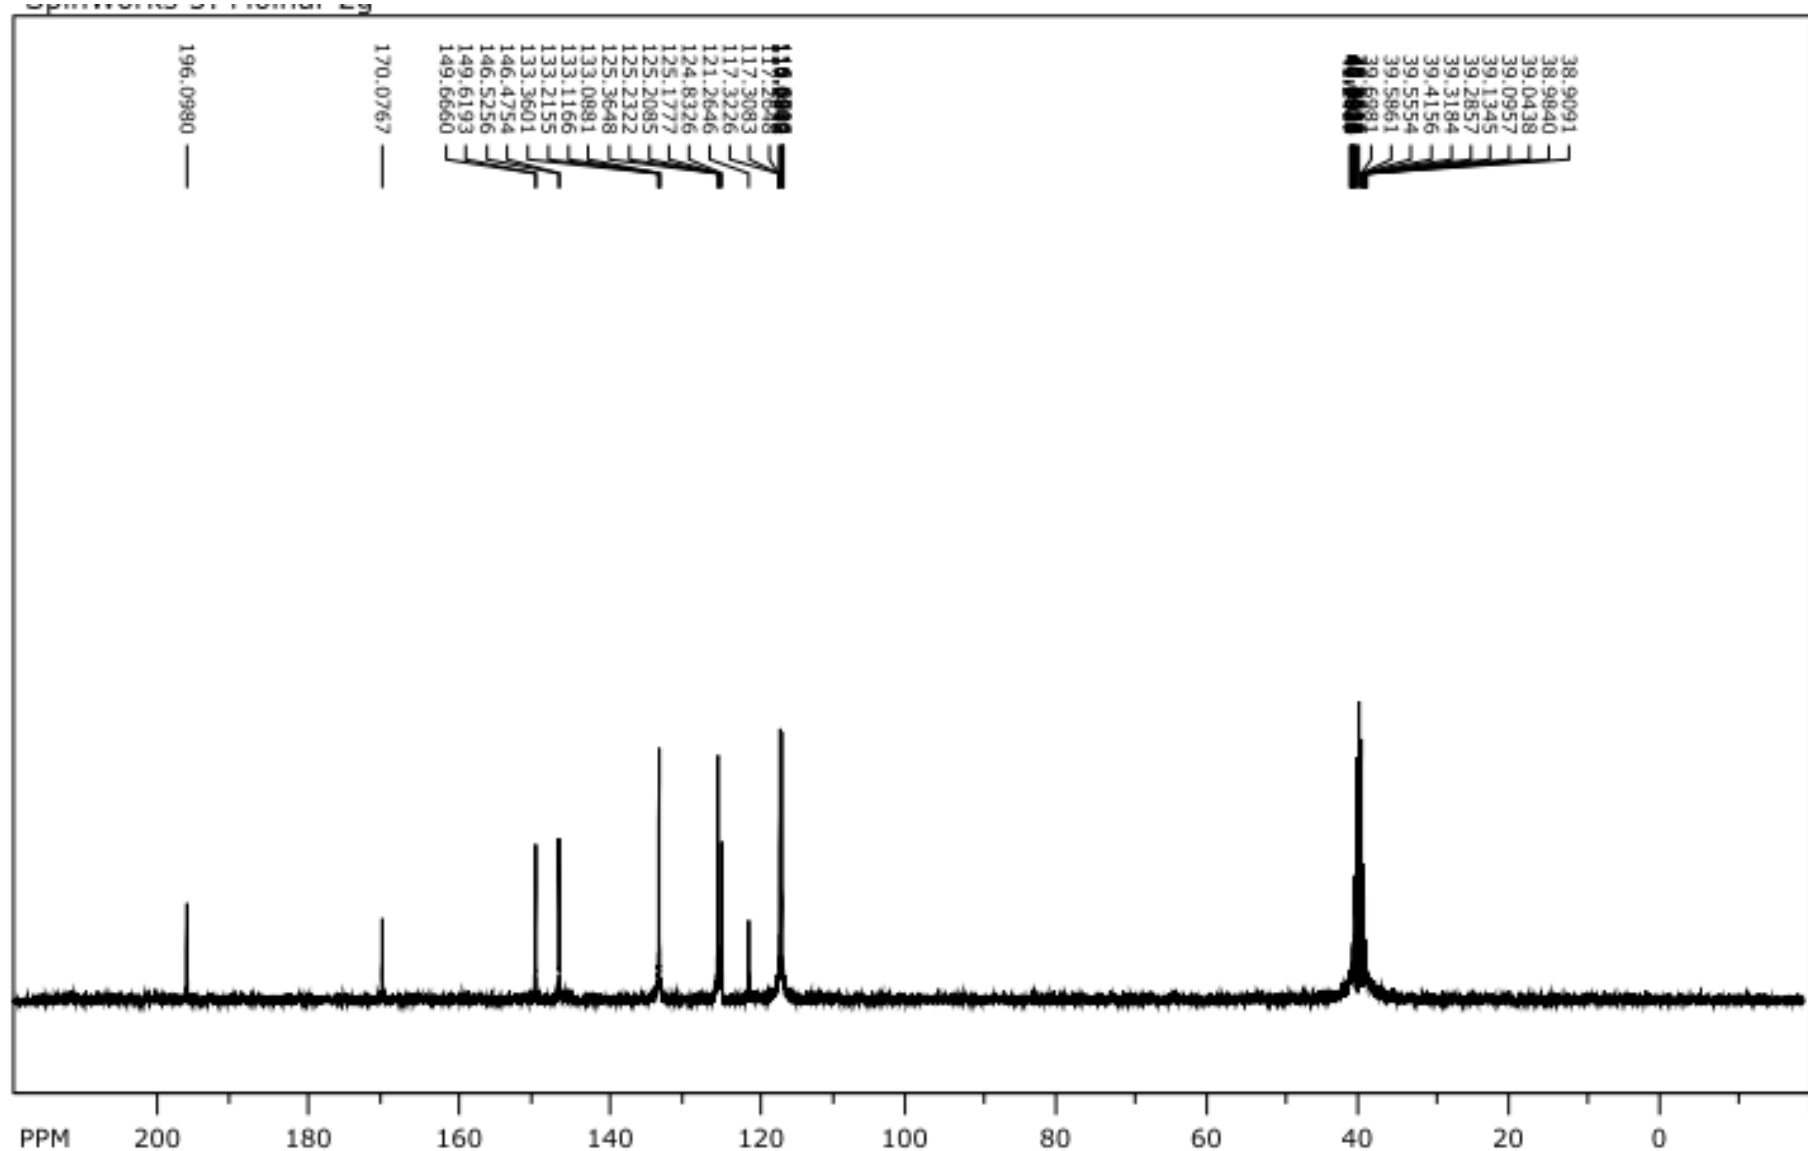

-Q1: 60 MCA scans from Sample 1 (038\_2g) of 038\_2g.wiff (Turbo Spray)

Max. 1.3e8 cps.

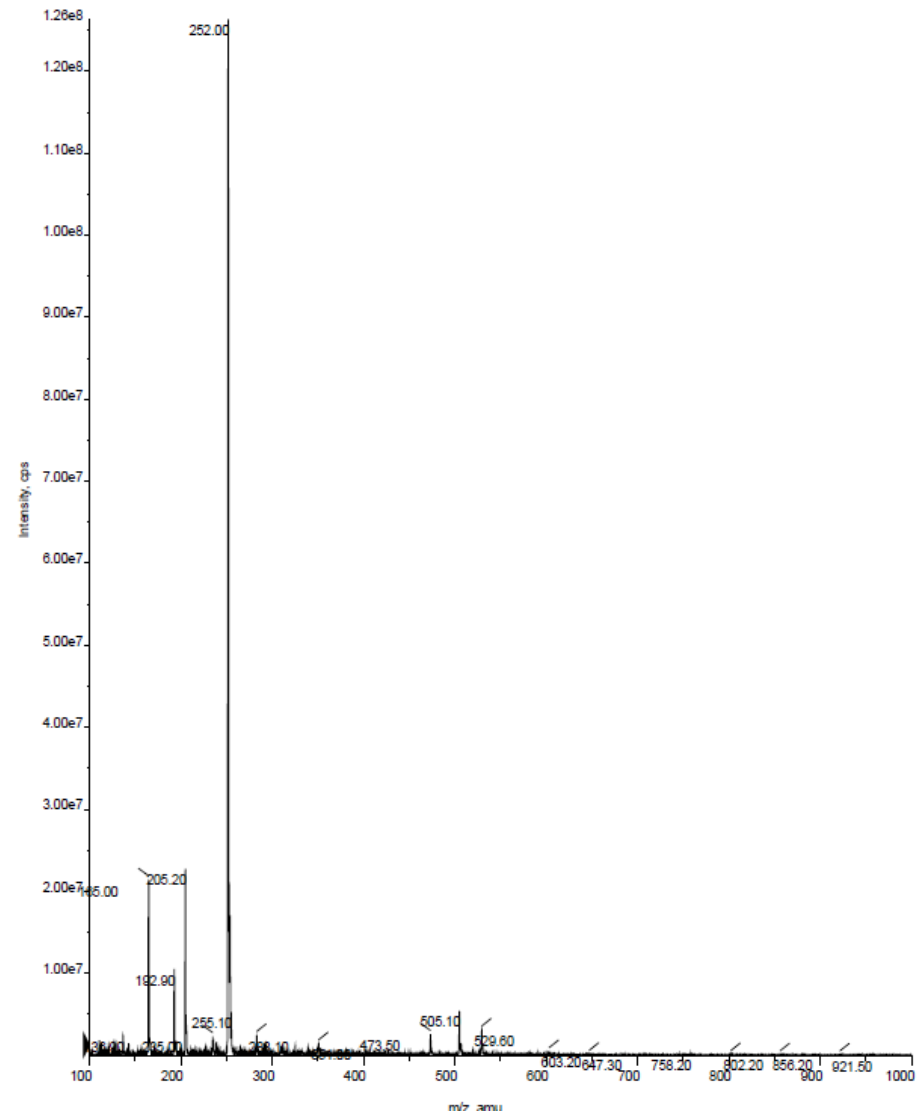



(Z)-5-(4-hydroxy-3-methoxybenzylidene)-2-thioxothiazolidin-4-one (2f)

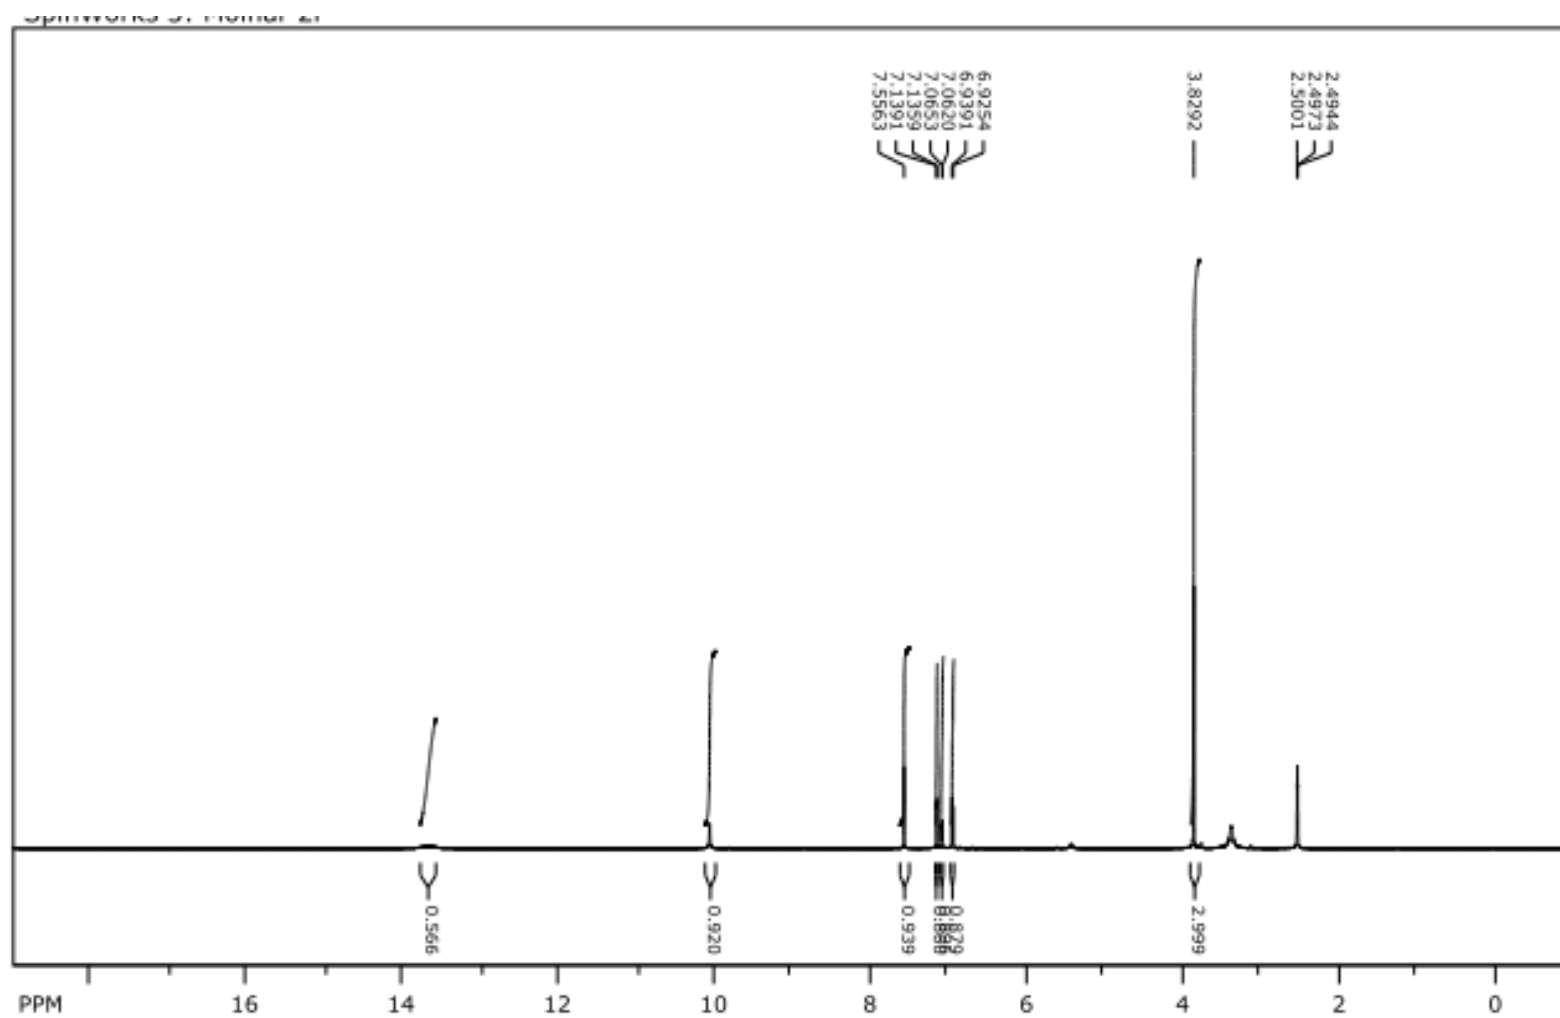

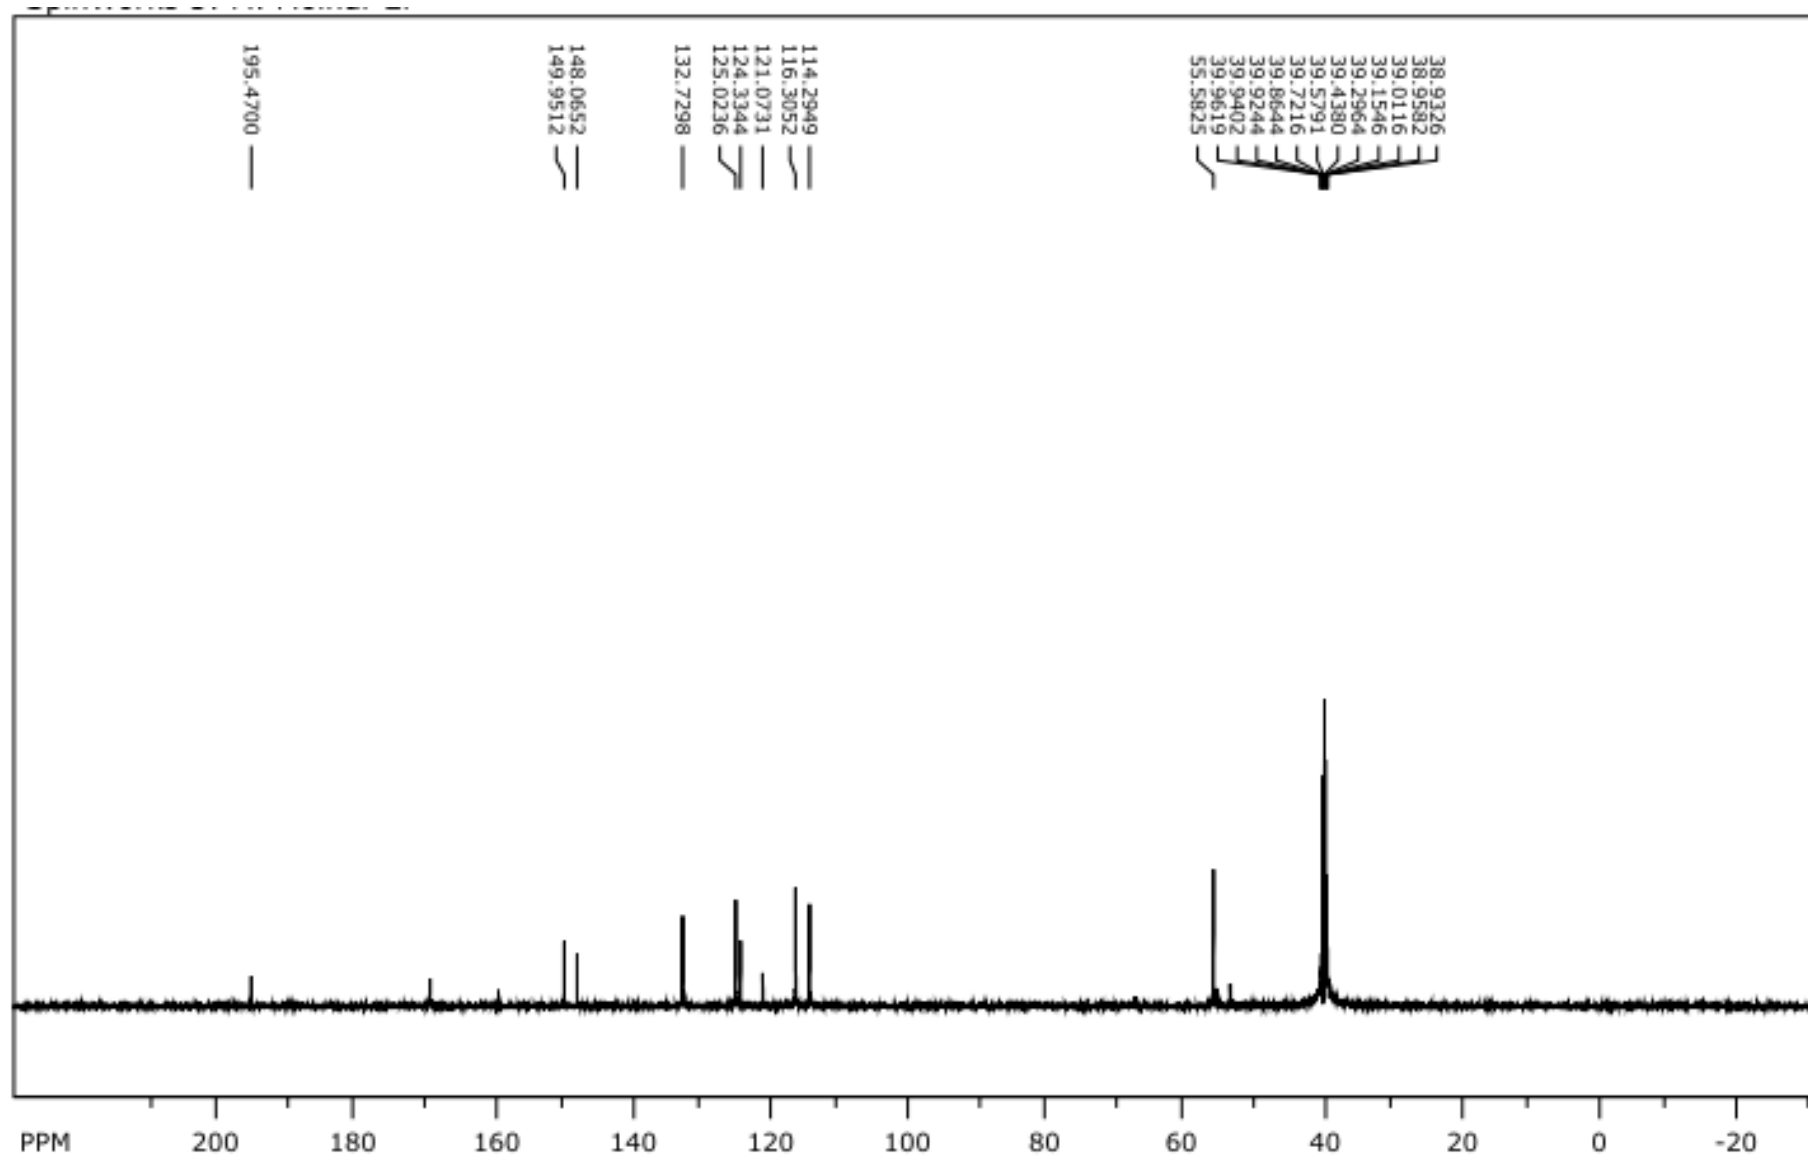

-Q1: 60 MCA scans from Sample 1 (040\_2i) of 040\_2i.wiff (Turbo Spray)

Max. 3.2e7 cps.

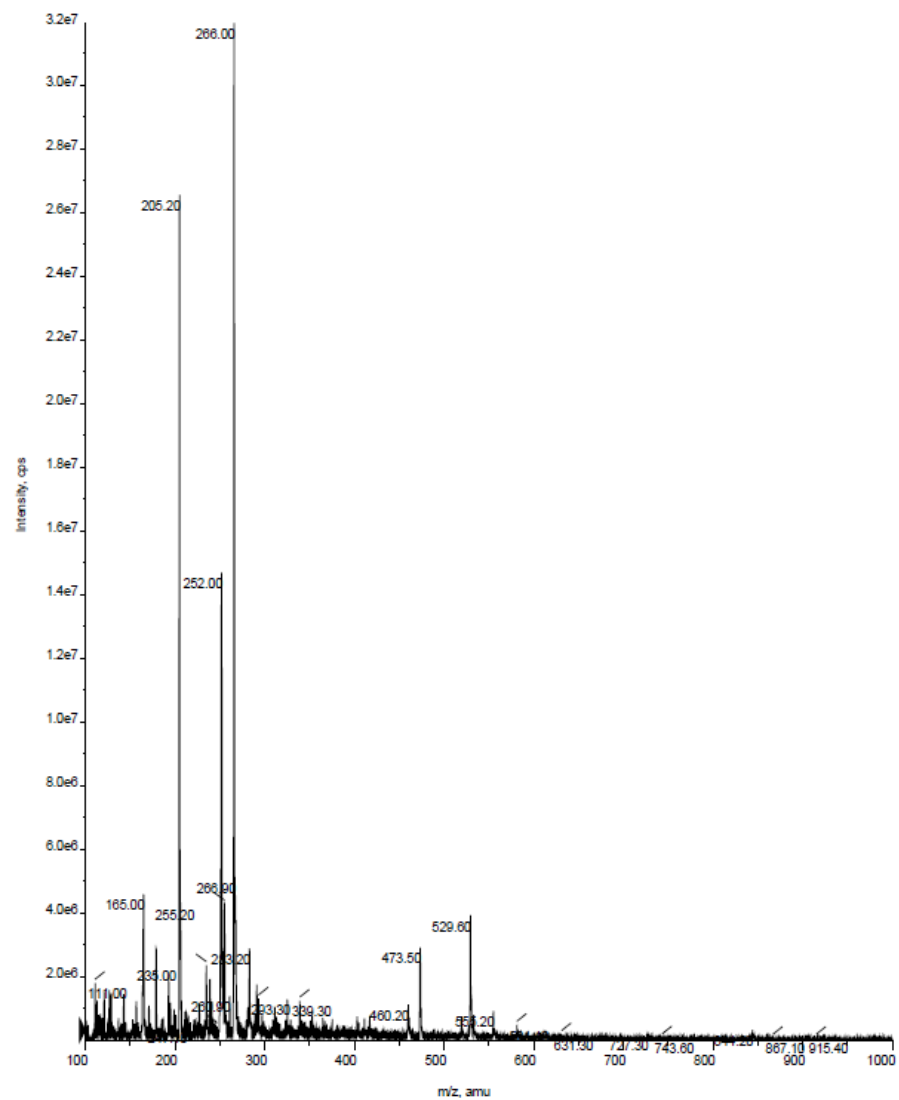

(Z)-5-(2-hydroxybenzylidene)-2-thioxothiazolidin-4-one (2g)

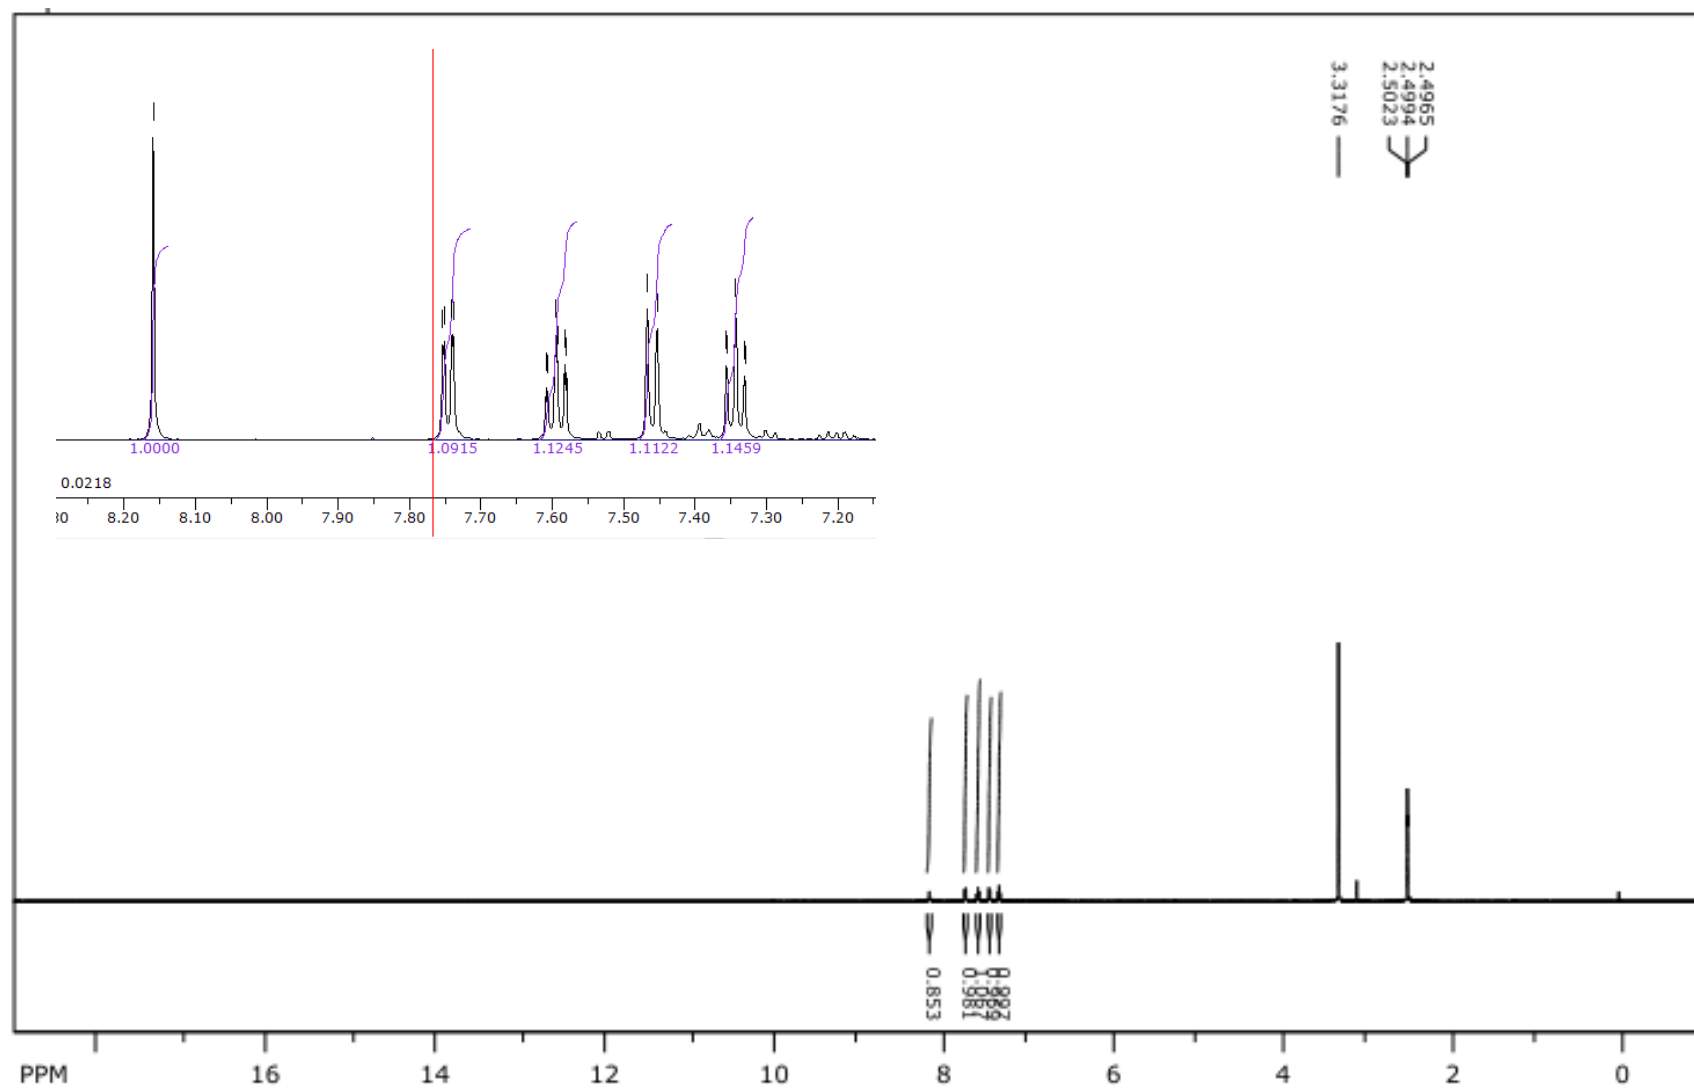

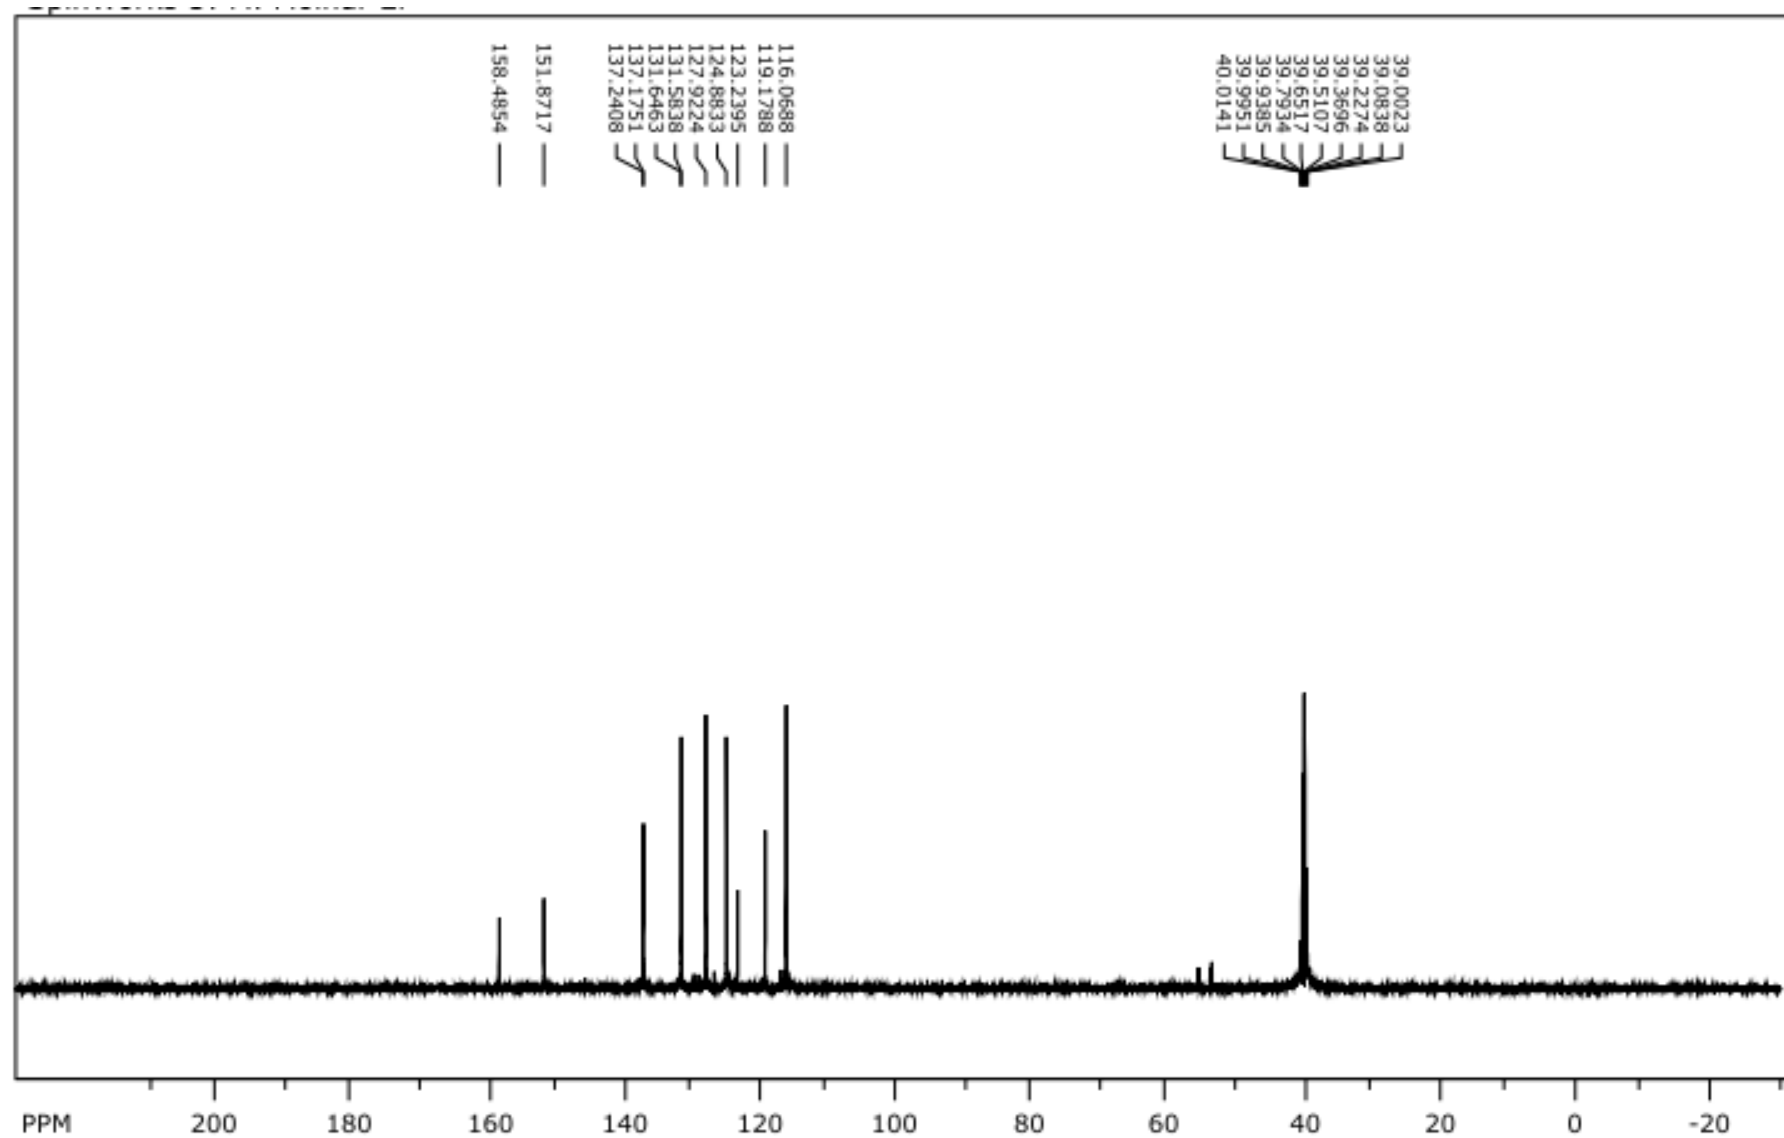

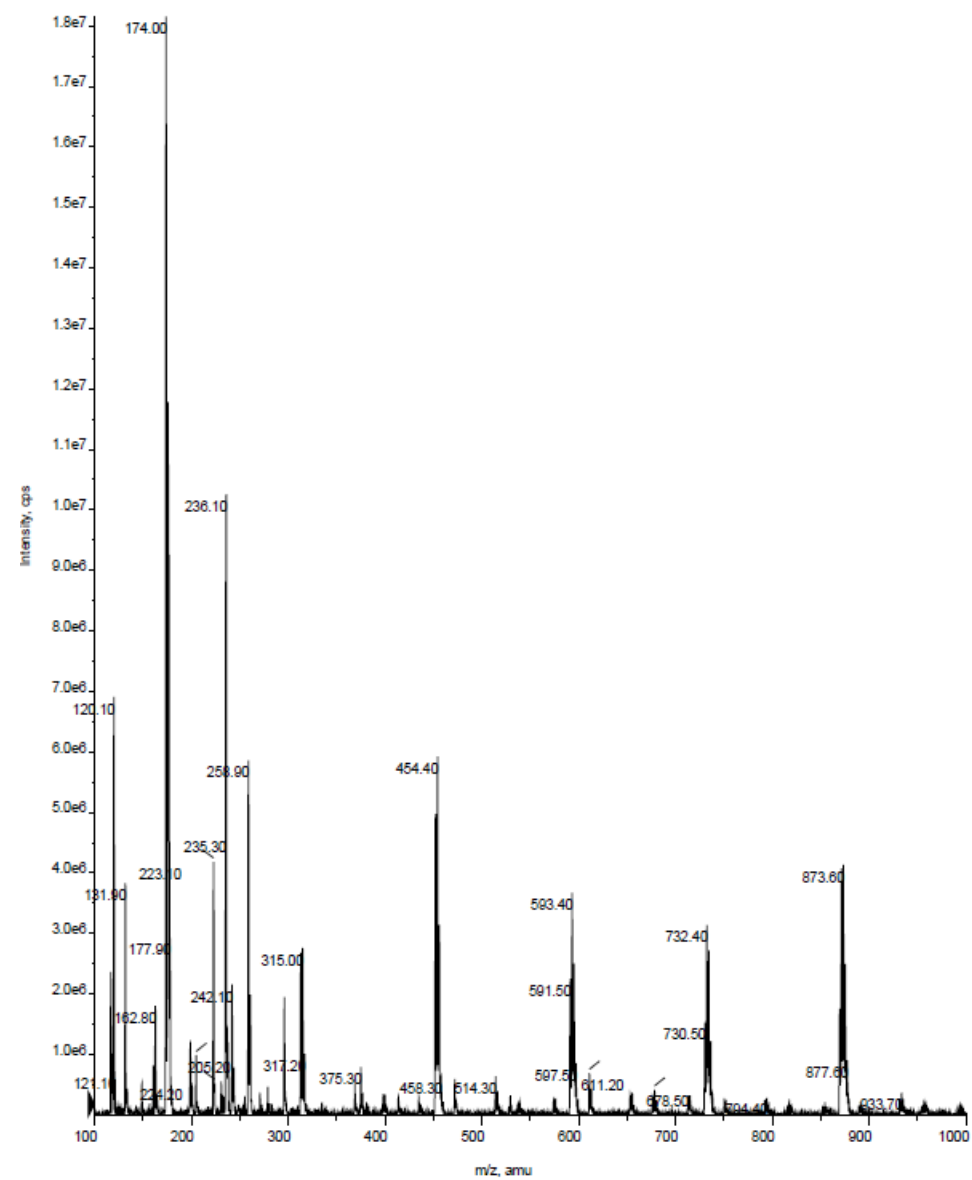

(Z)-5-benzylidene-2-thioxothiazolidin-4-one (2h)

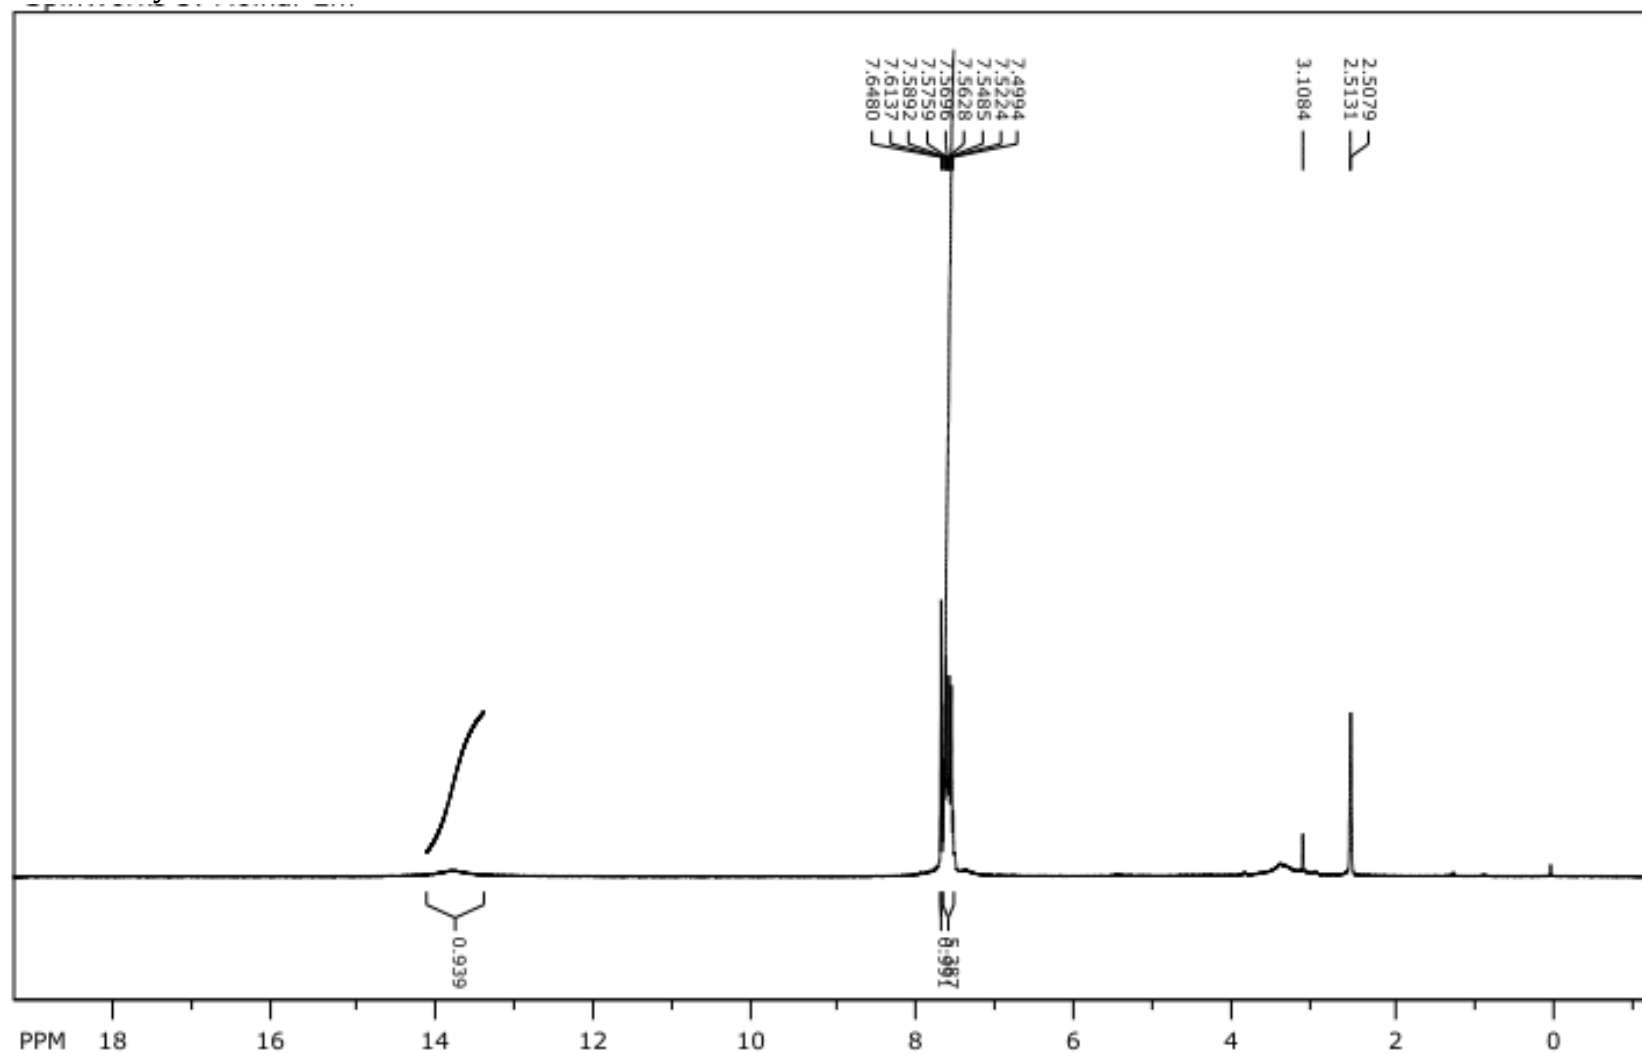

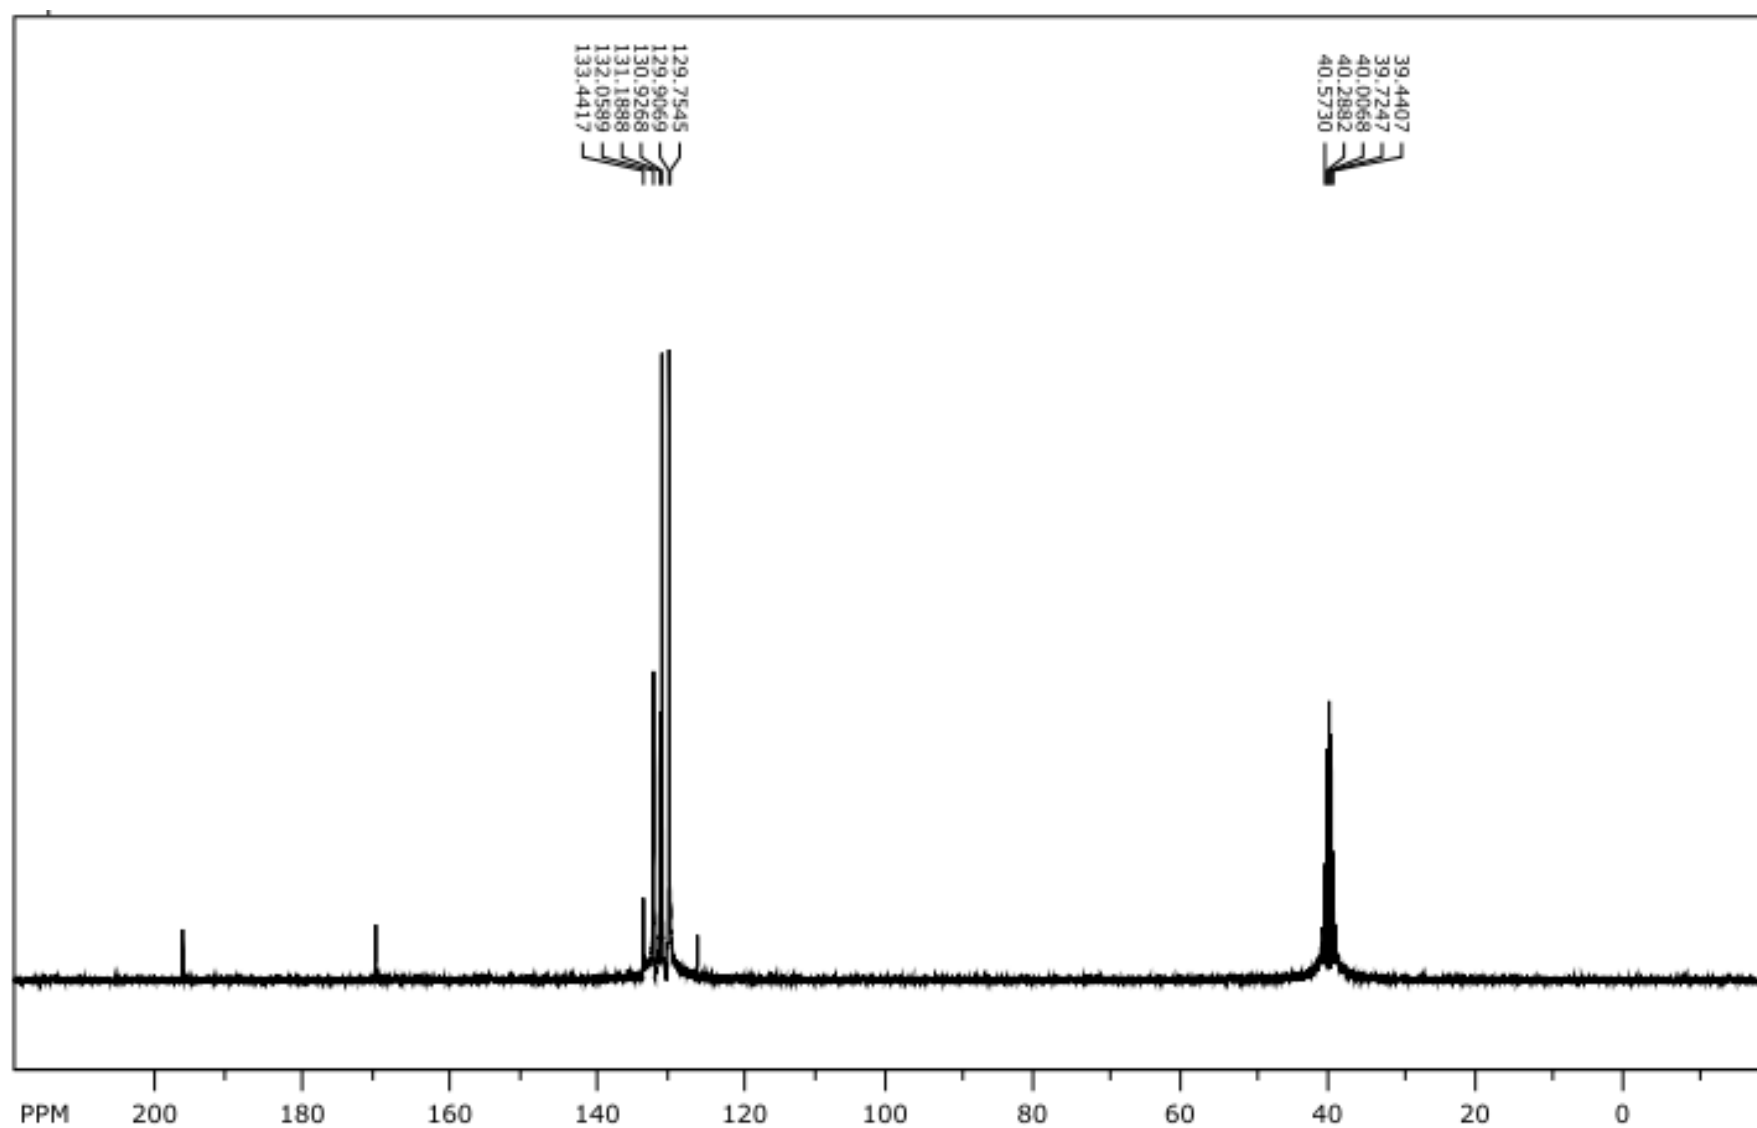



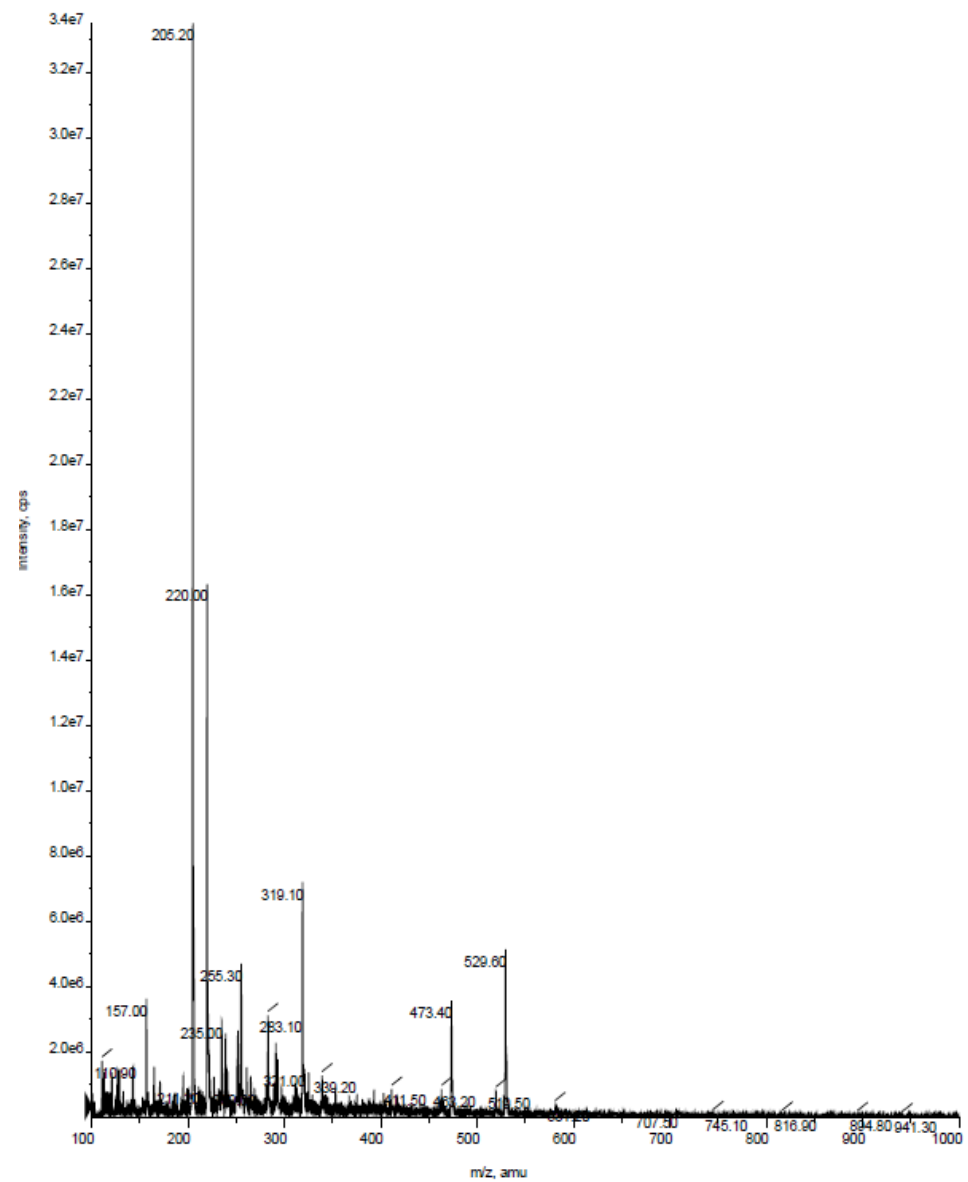

(Z)-5-(pyridin-4-ylmethylene)-2-thioxothiazolidin-4-one (2i)

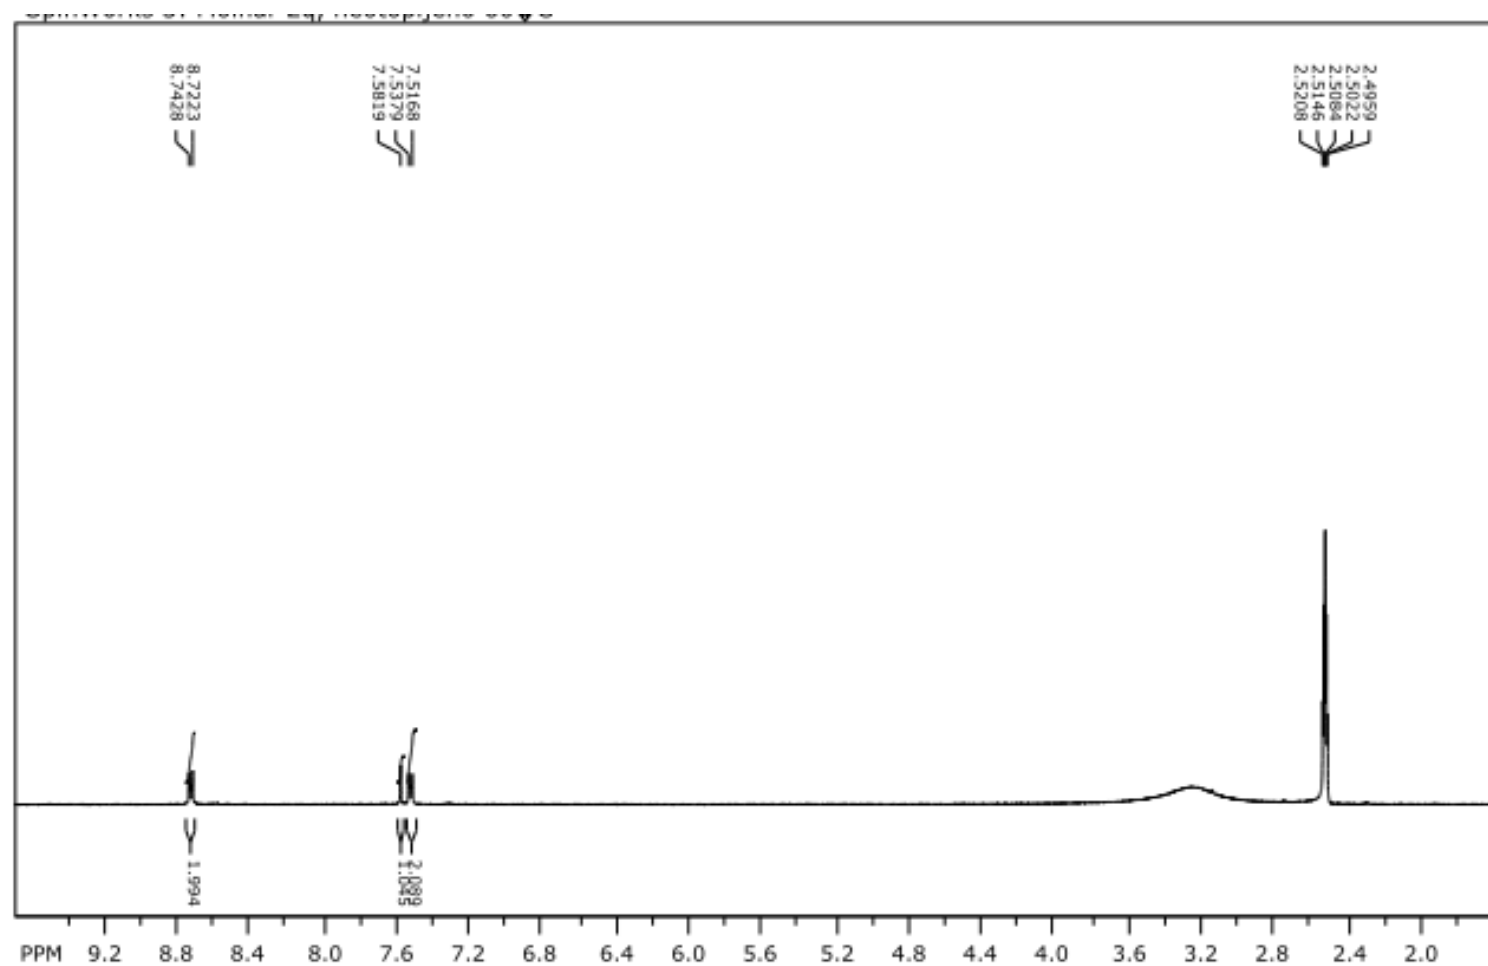

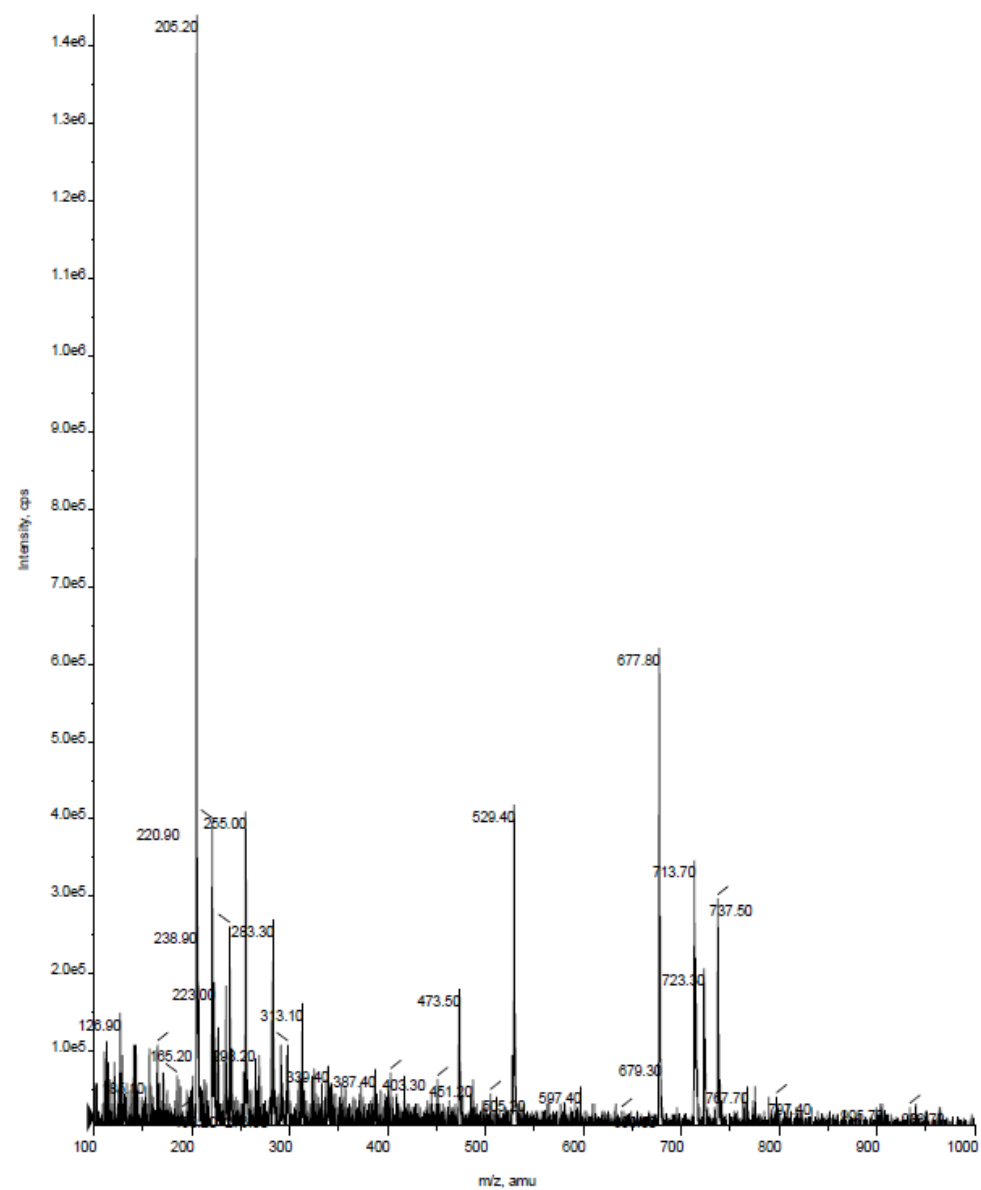

(Z)-5-(2,5-dimethoxybenzylidene)-2-thioxothiazolidin-4-one (2j)

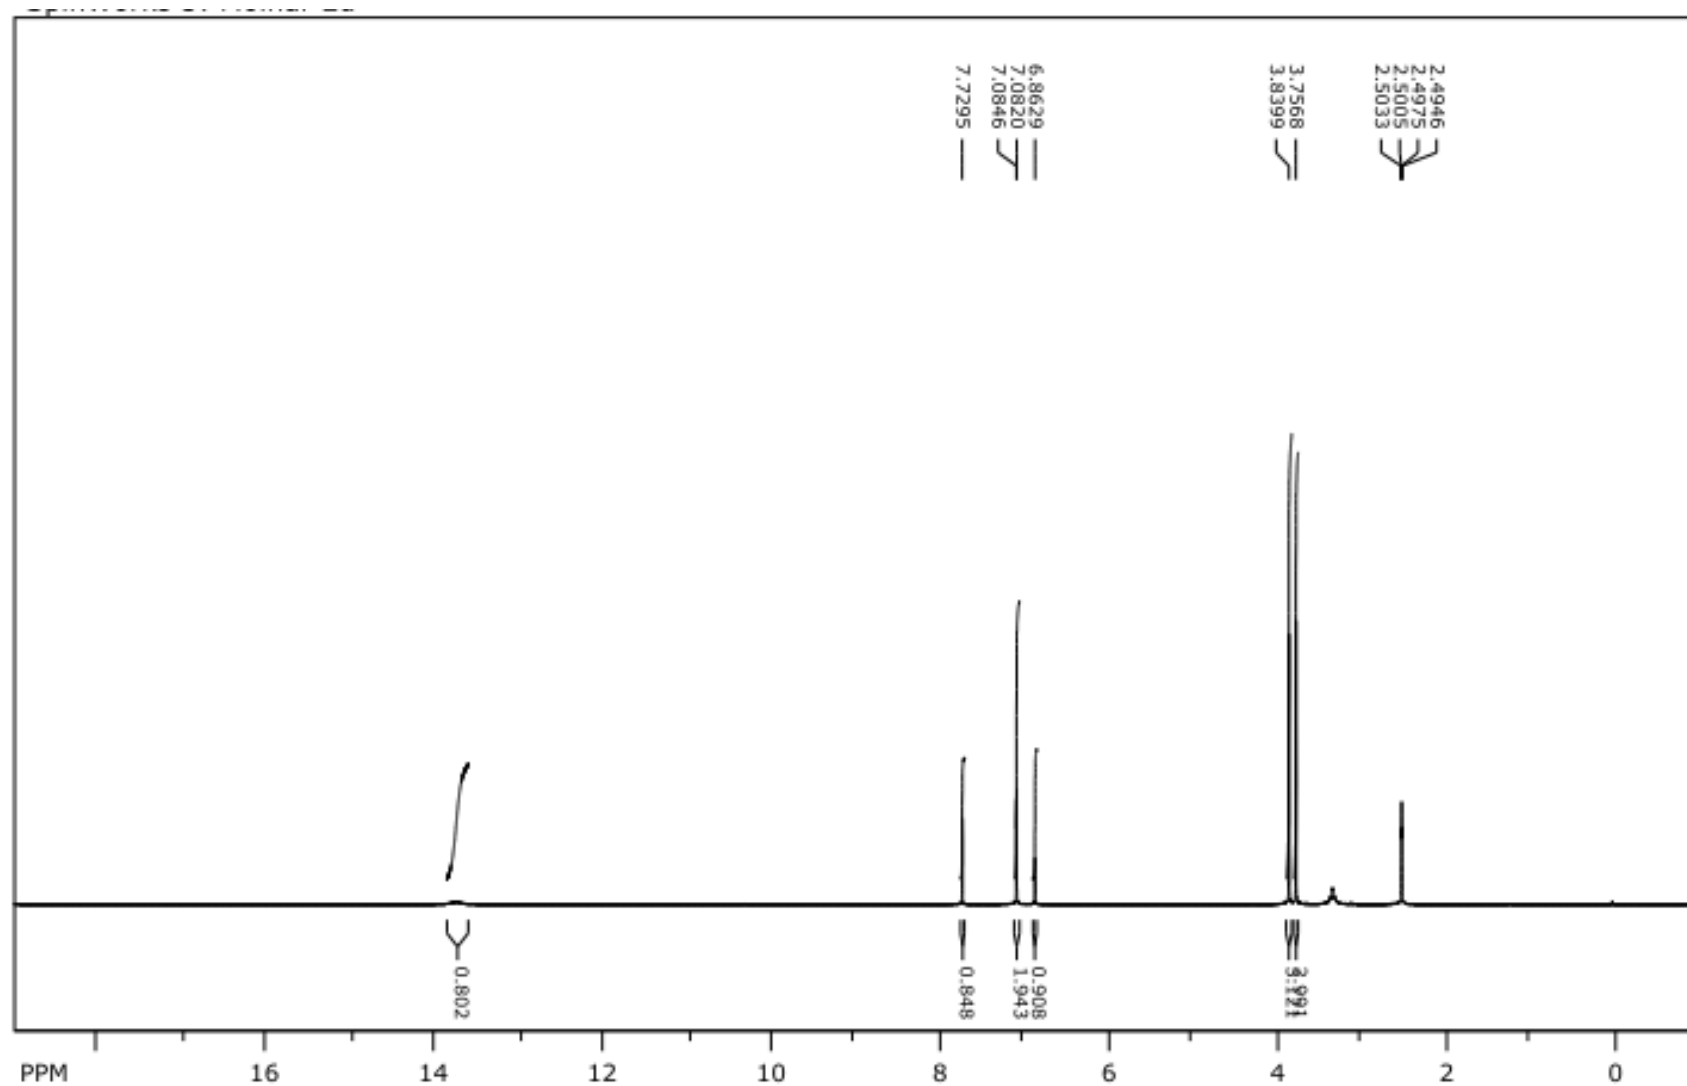

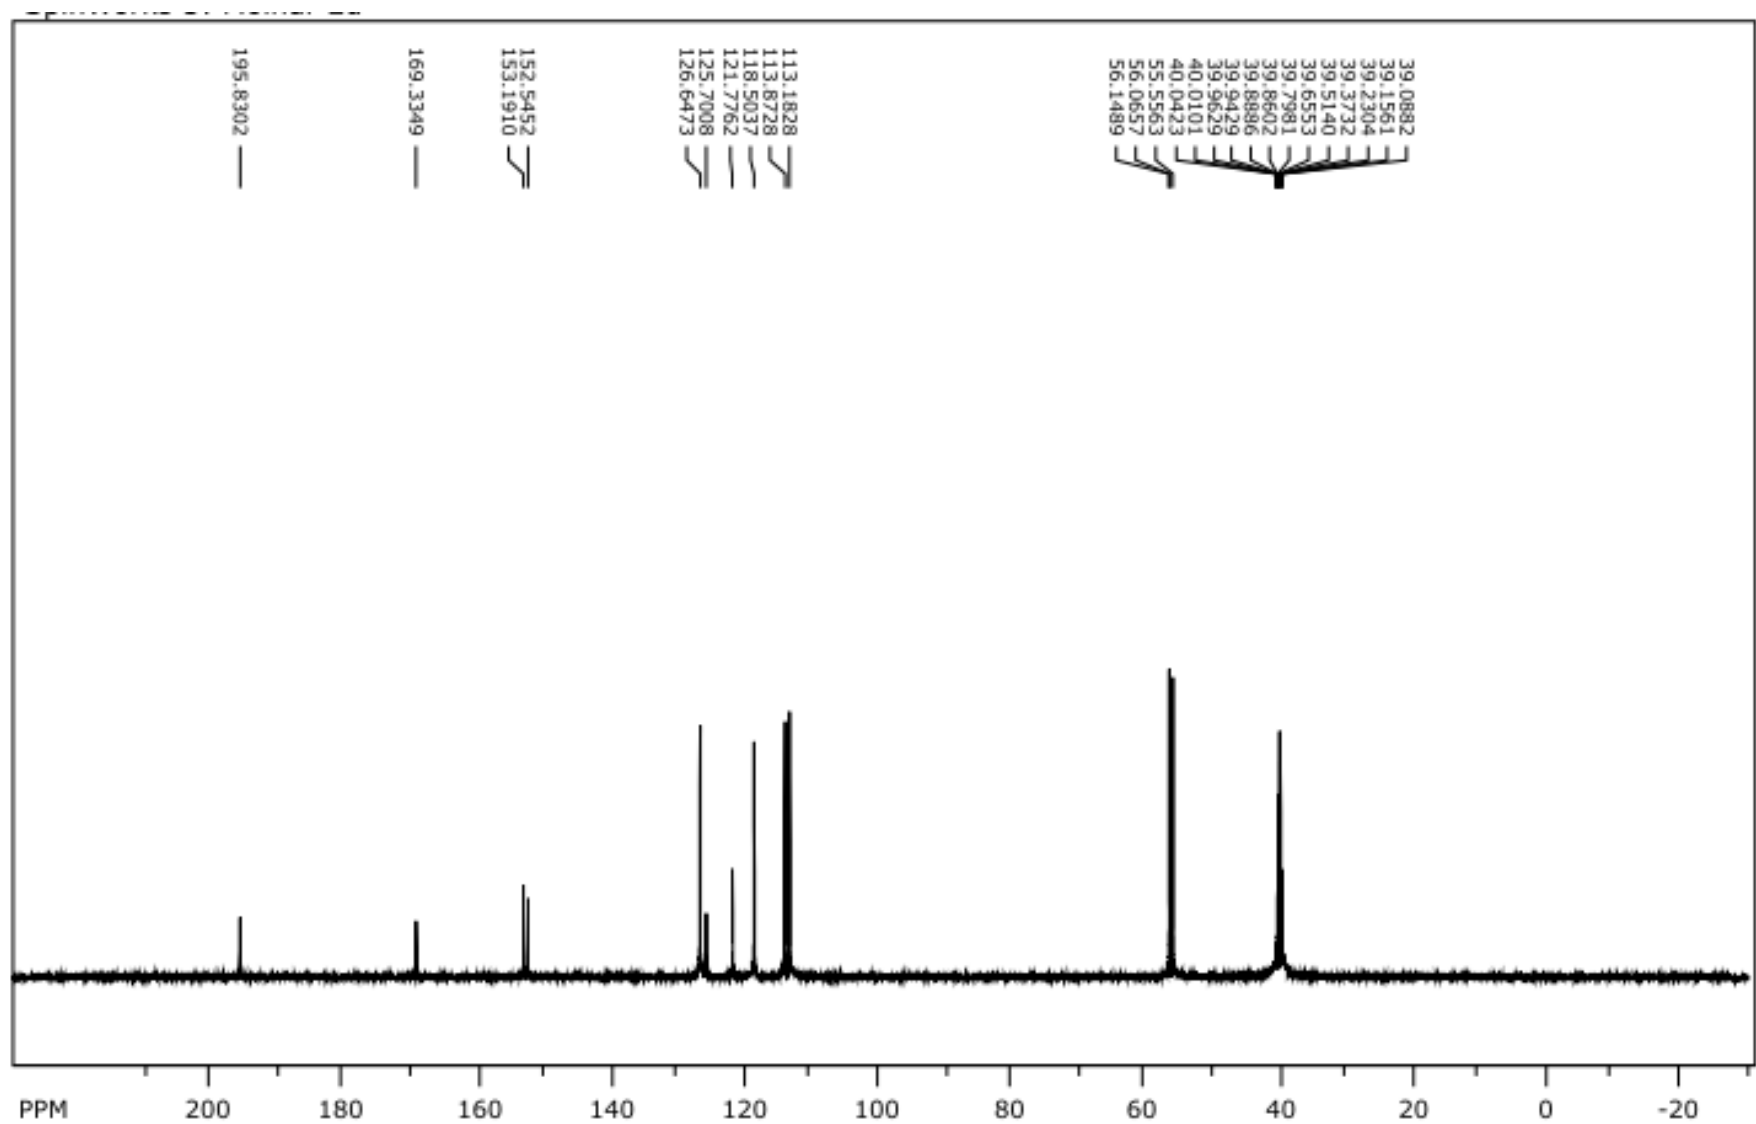

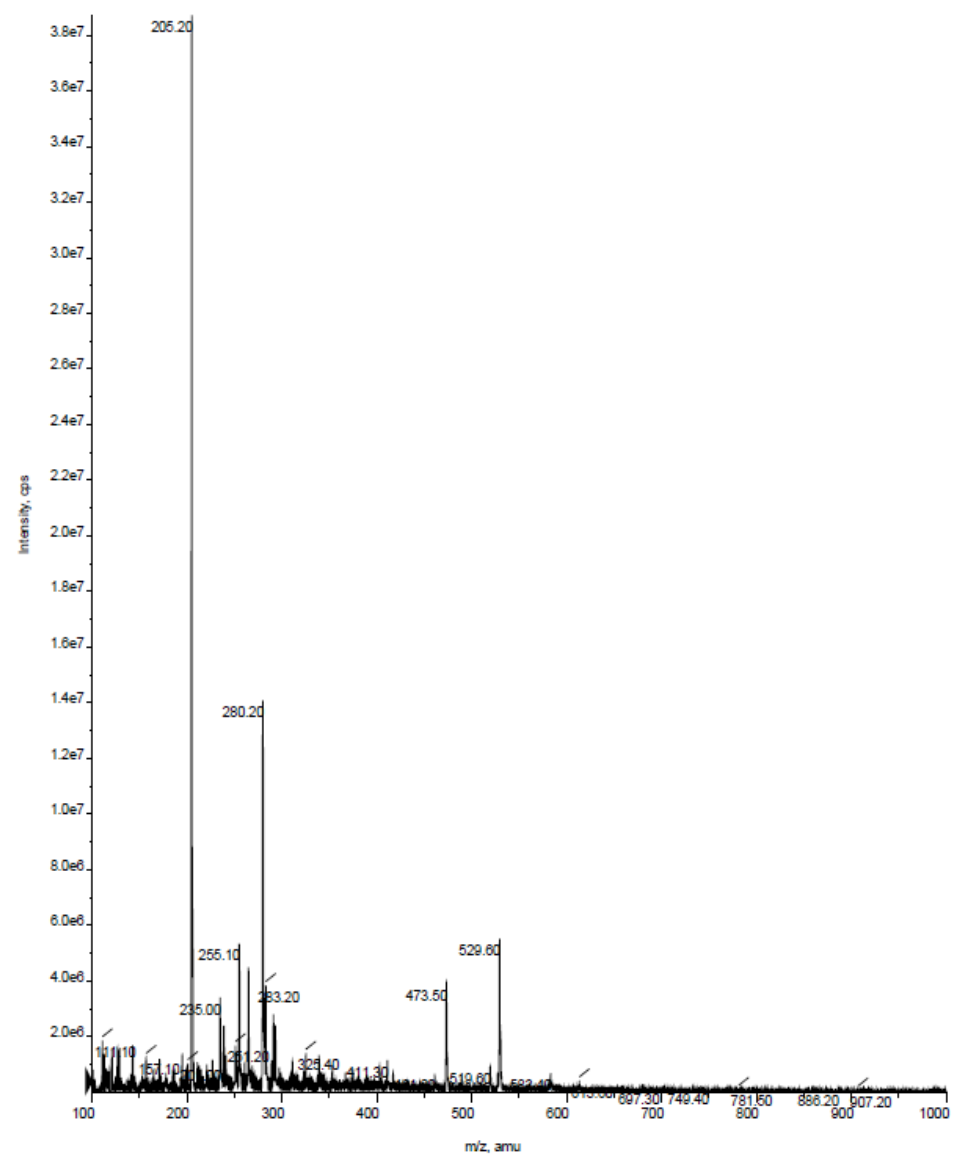

(Z)-5-(4-hydroxybenzylidene)-2-thioxothiazolidin-4-one (2k)

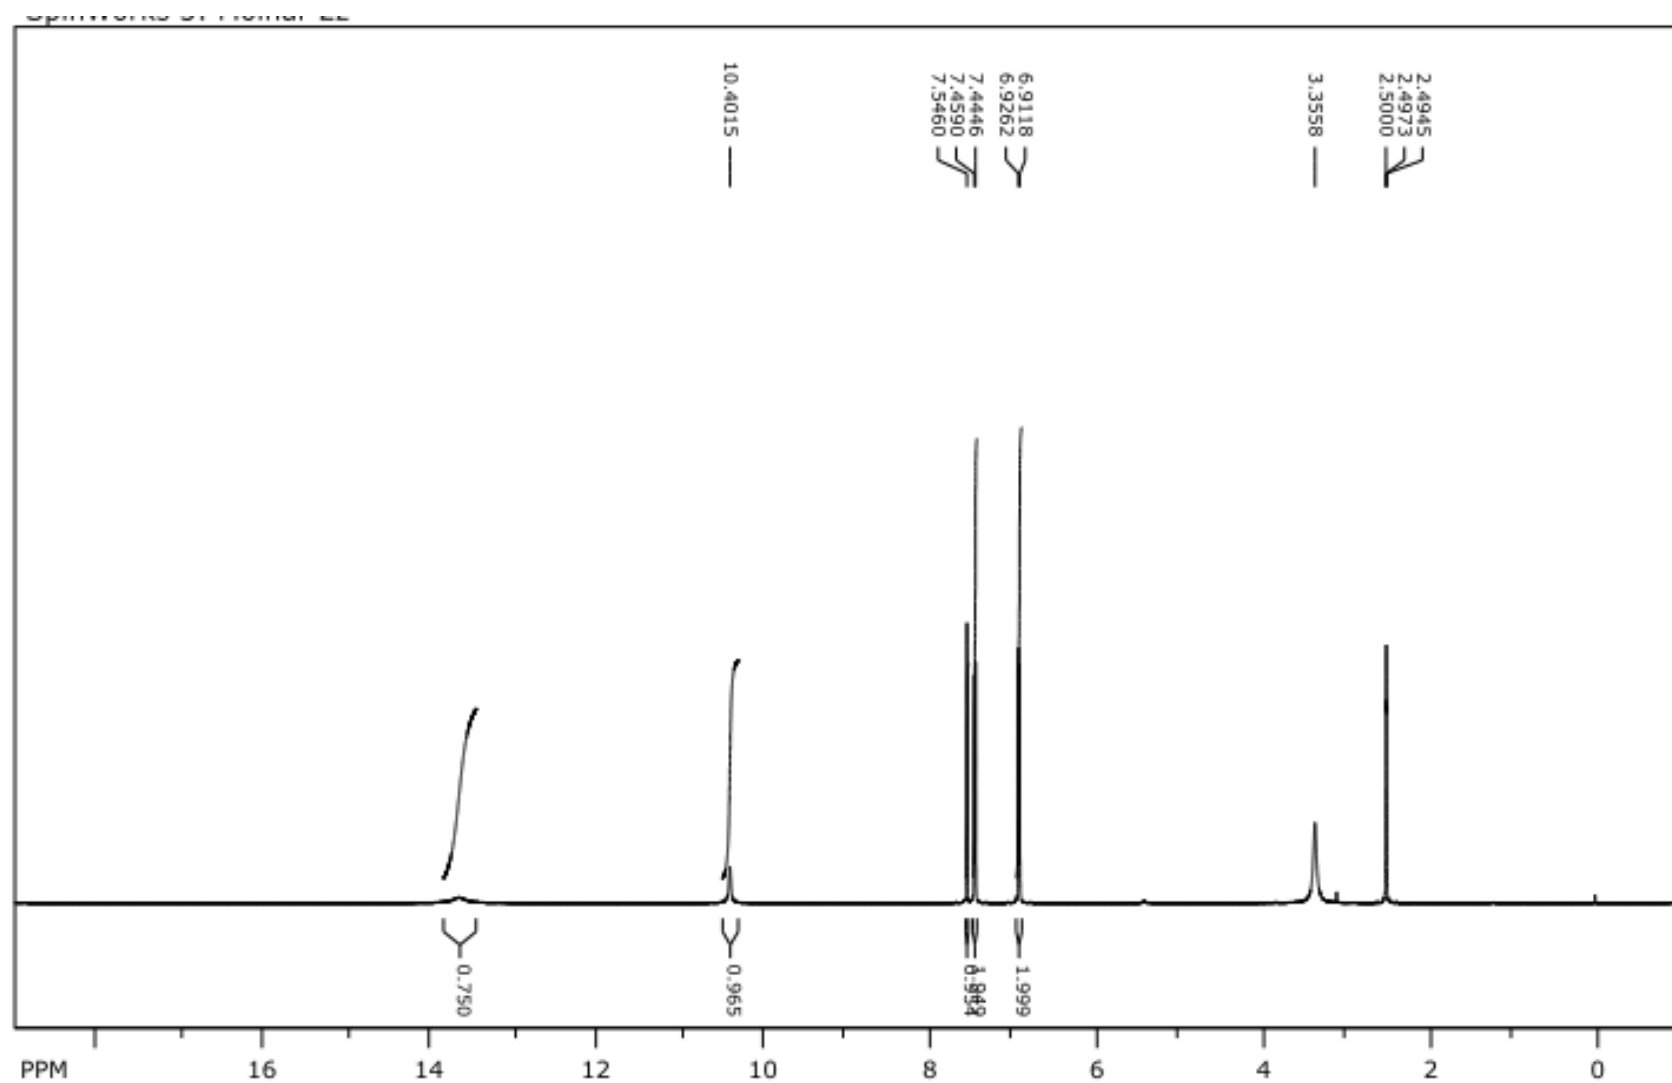

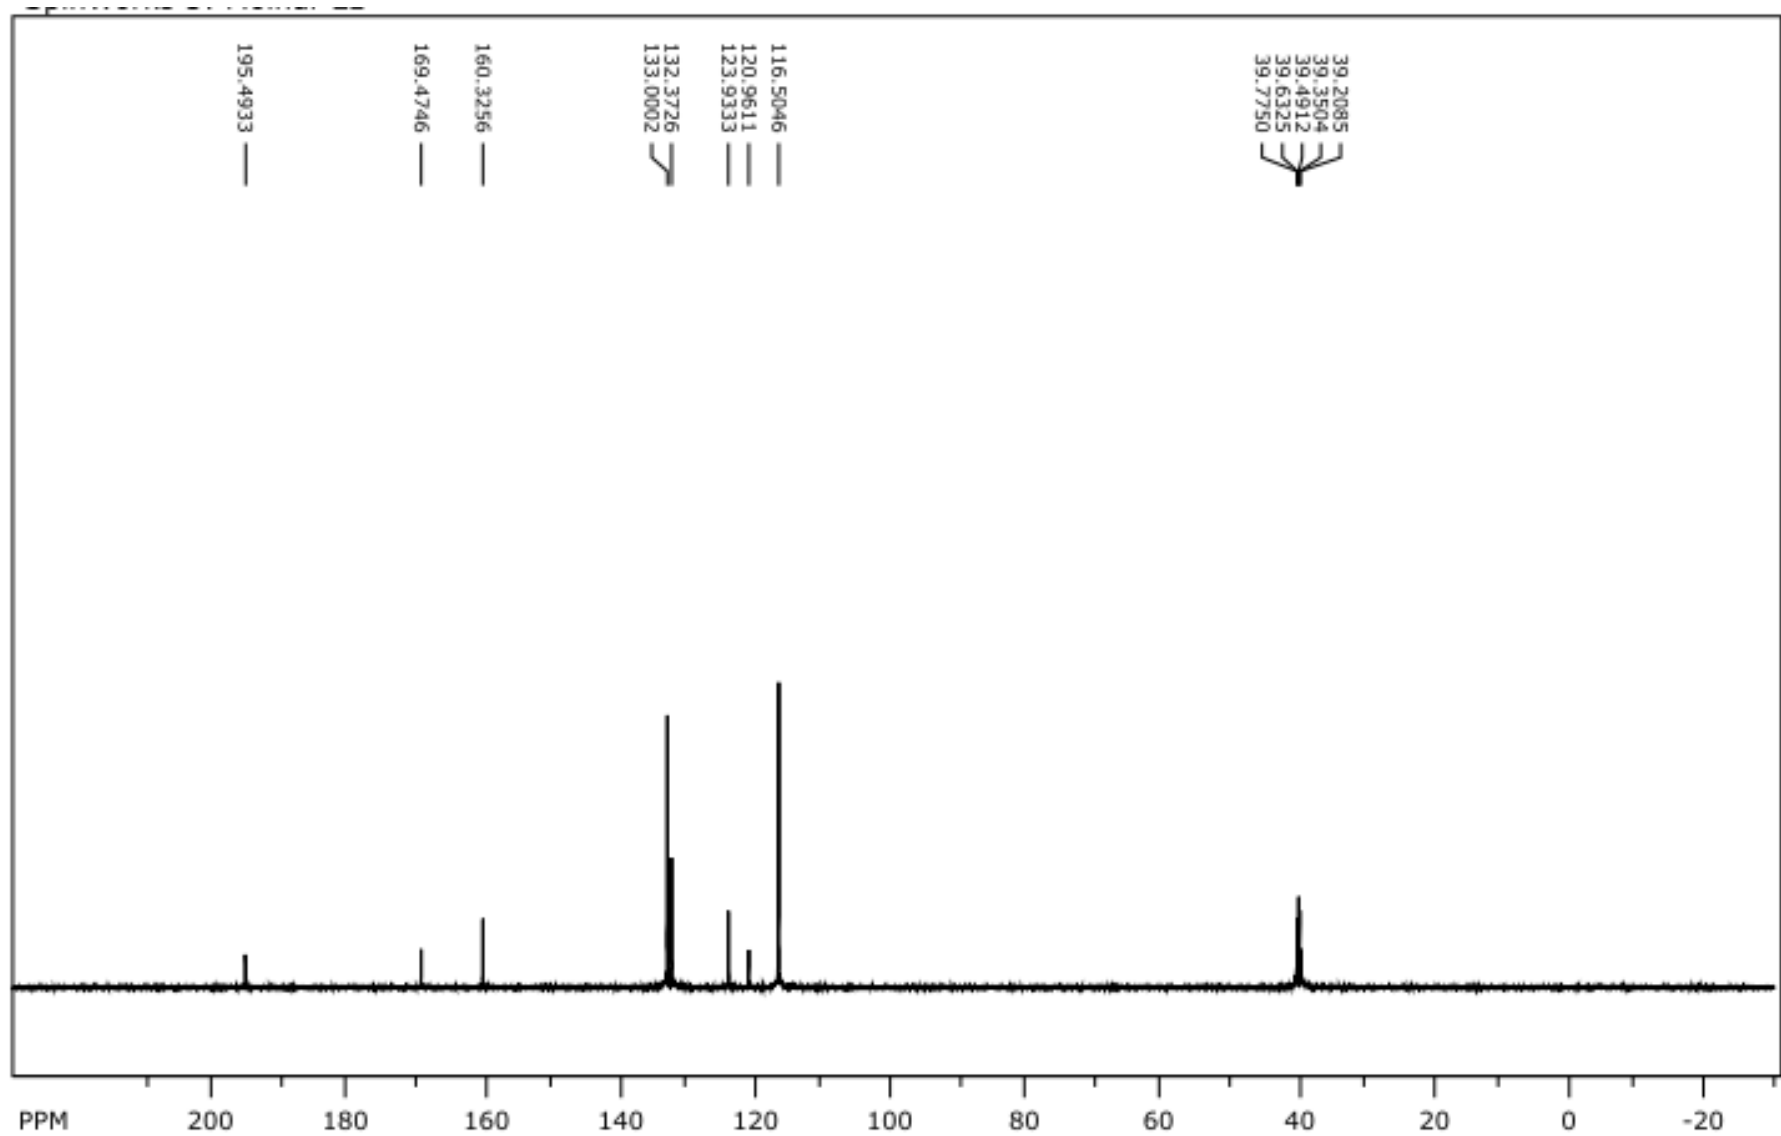



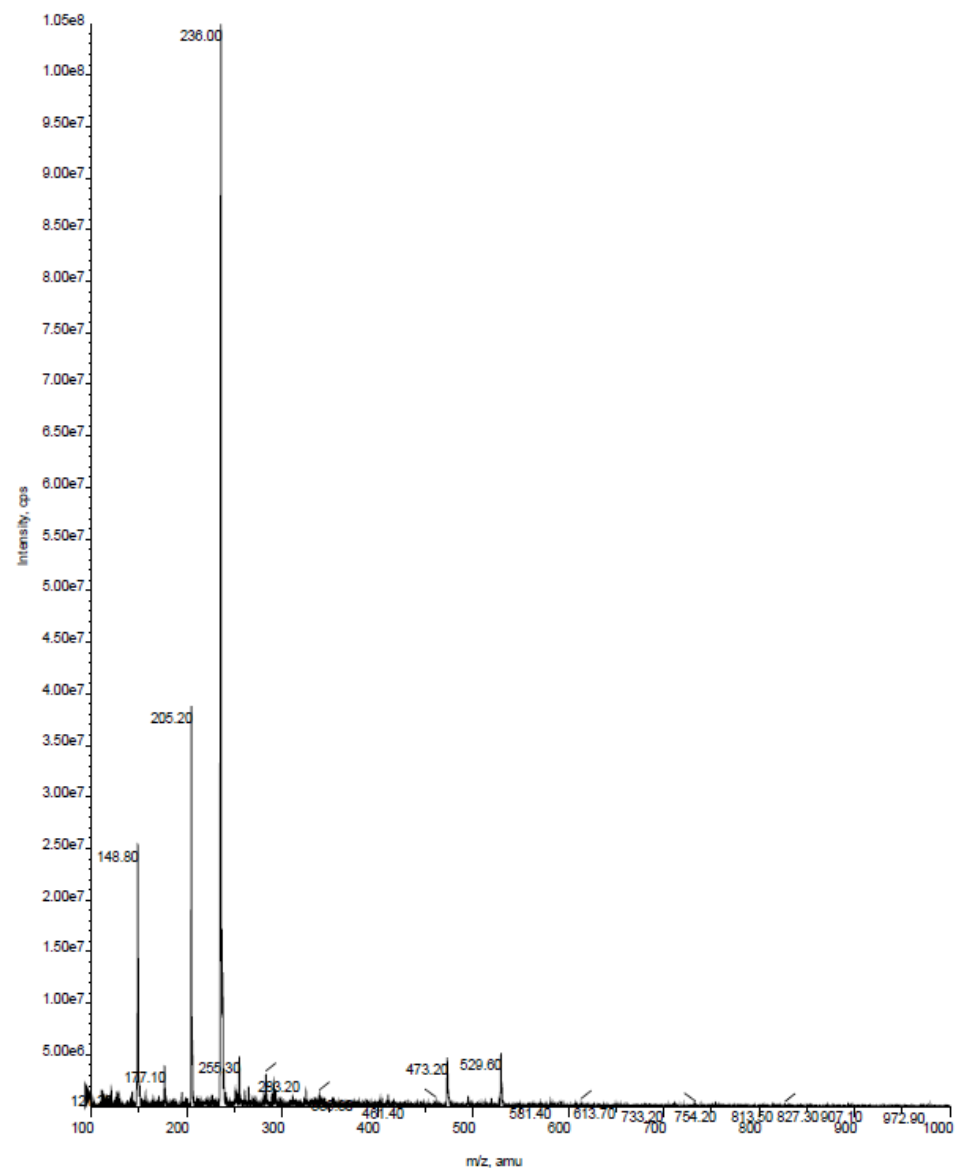

(Z)-3-(4-chlorophenyl)-5-(4-hydroxy-3-methoxybenzylidene)-2-thioxothiazolidin-4-one (2l)

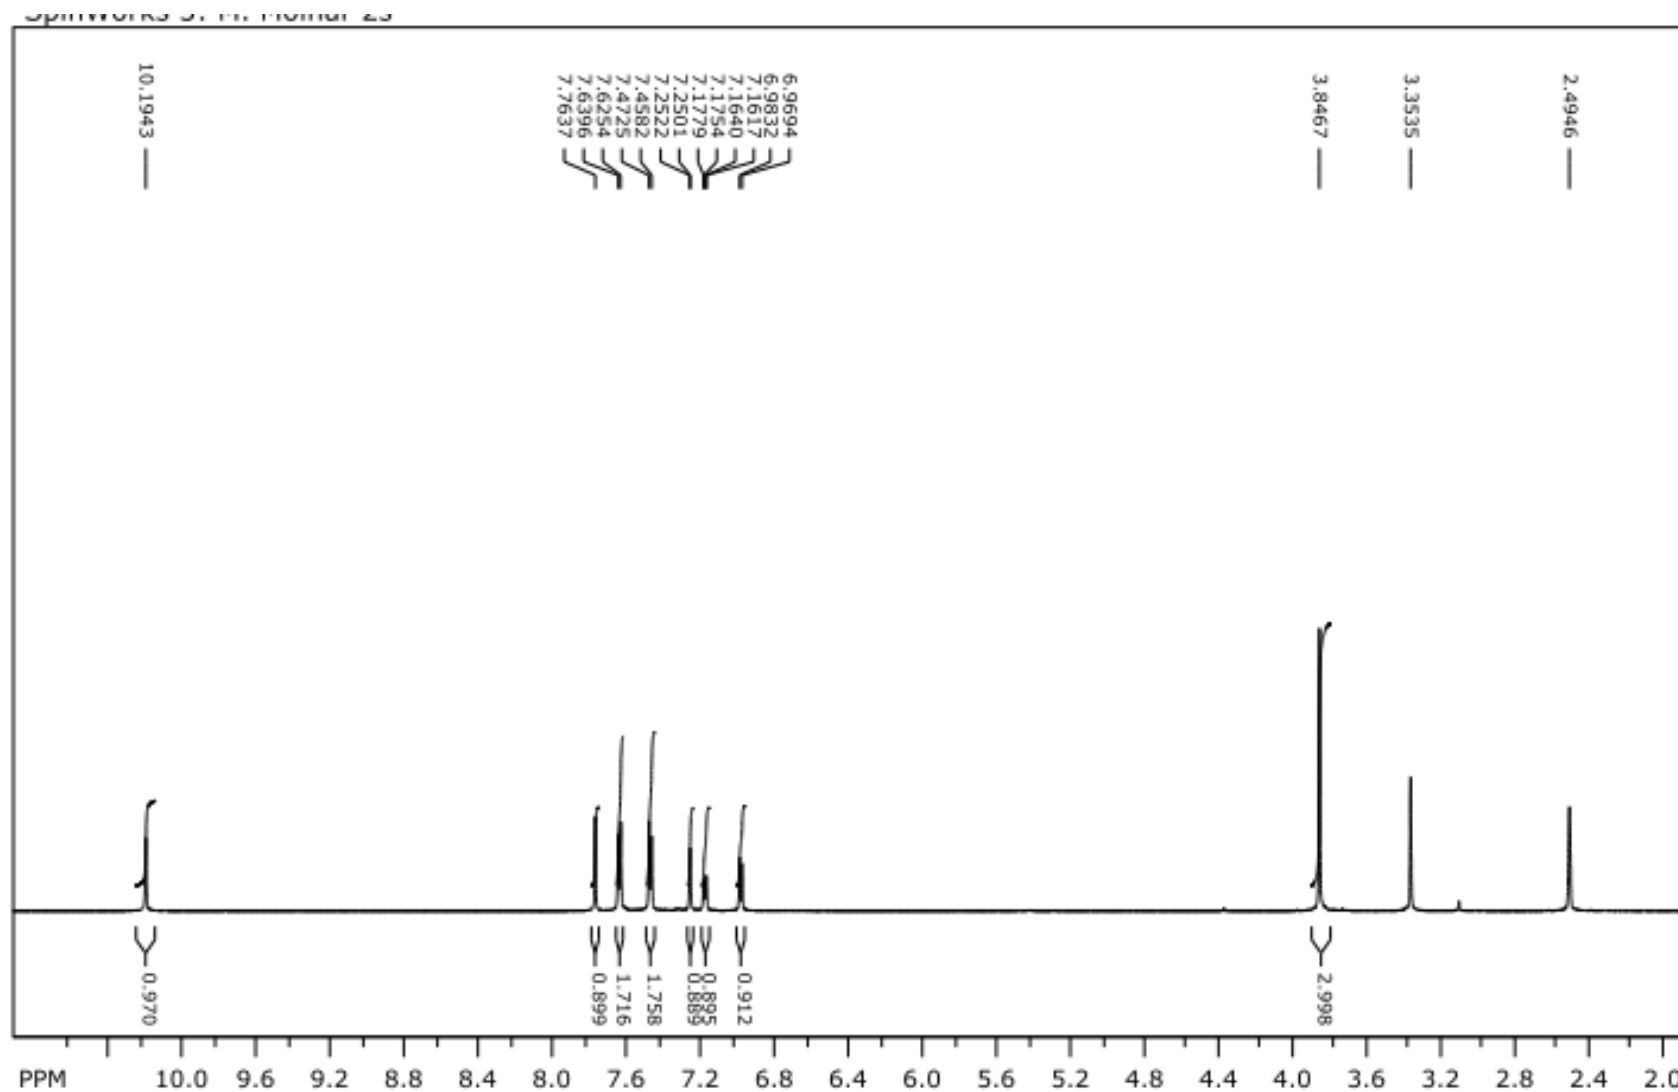

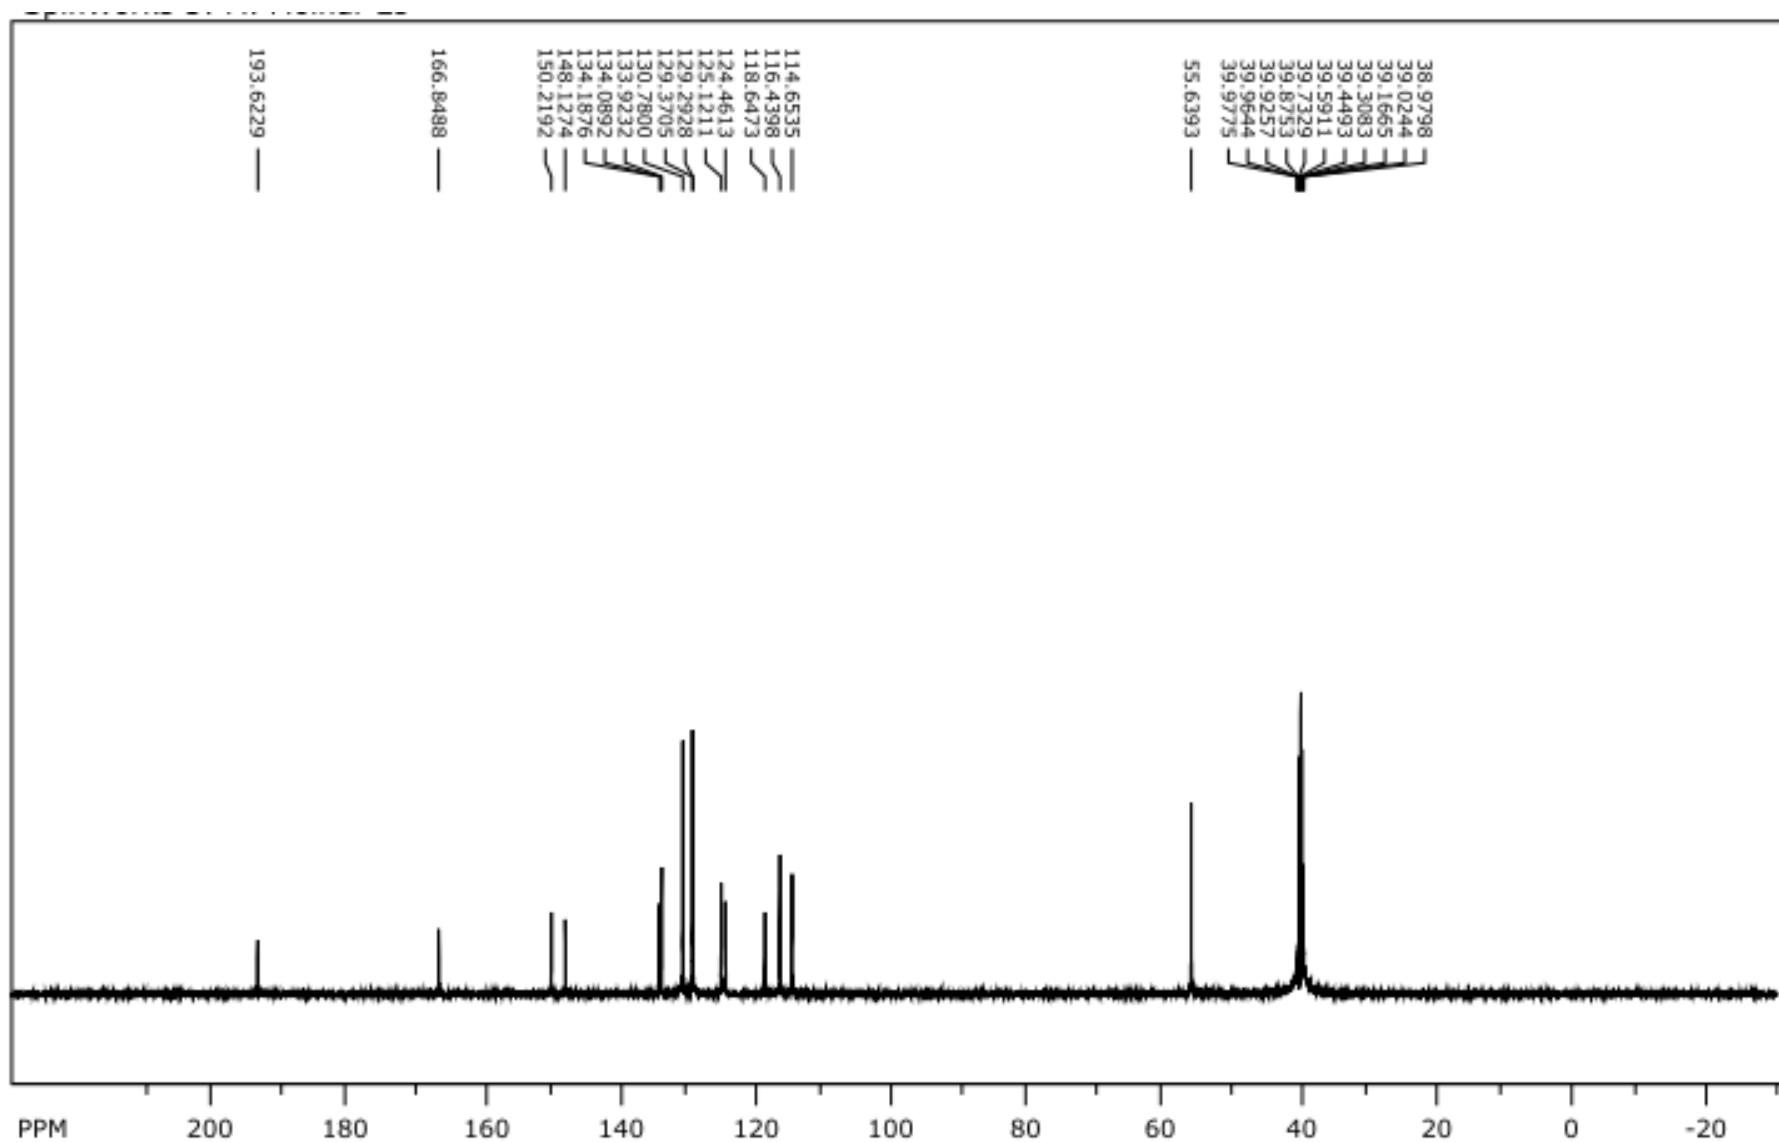

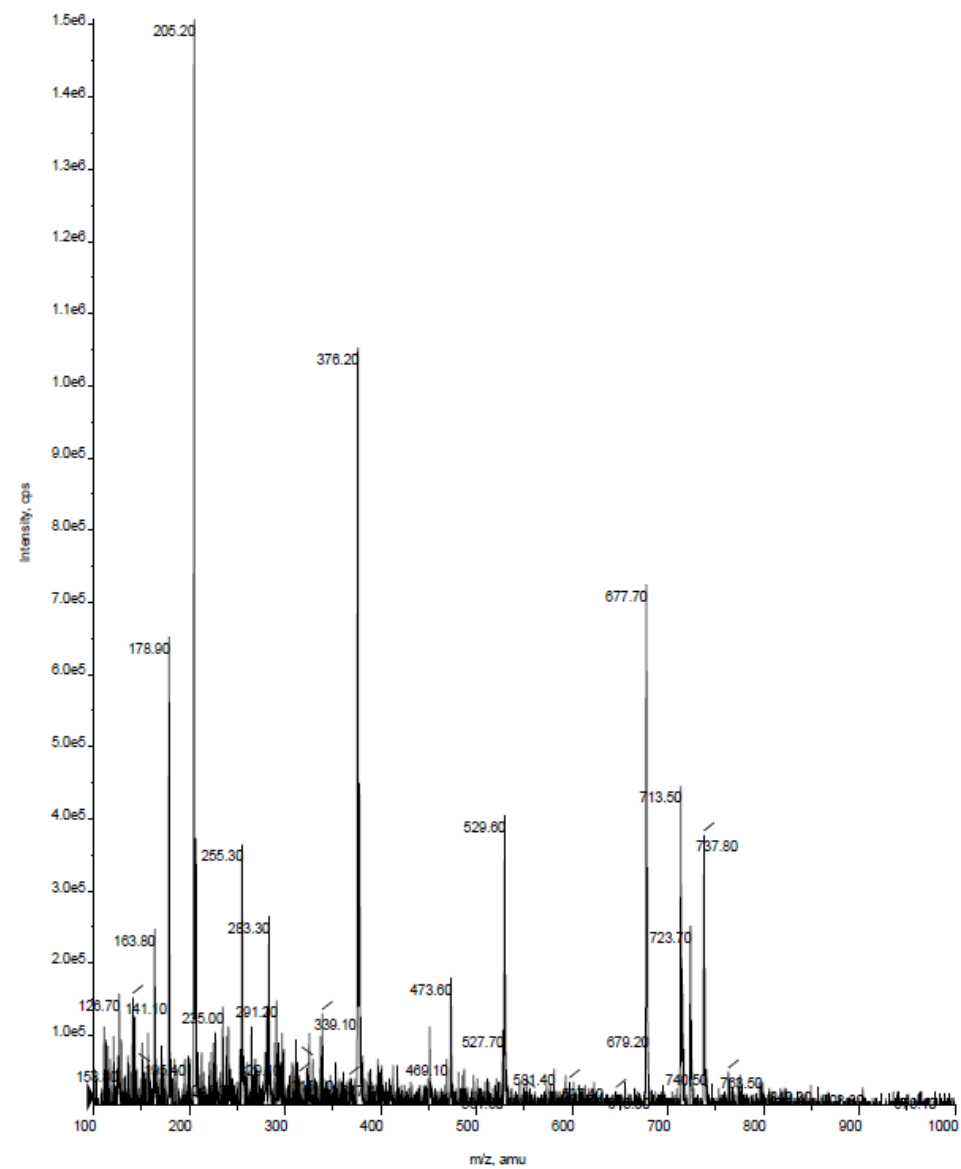

(Z)-3-(4-chlorophenyl)-5-(4-(dimethylamino)benzylidene)-2-thioxothiazolidin-4-one (2m)

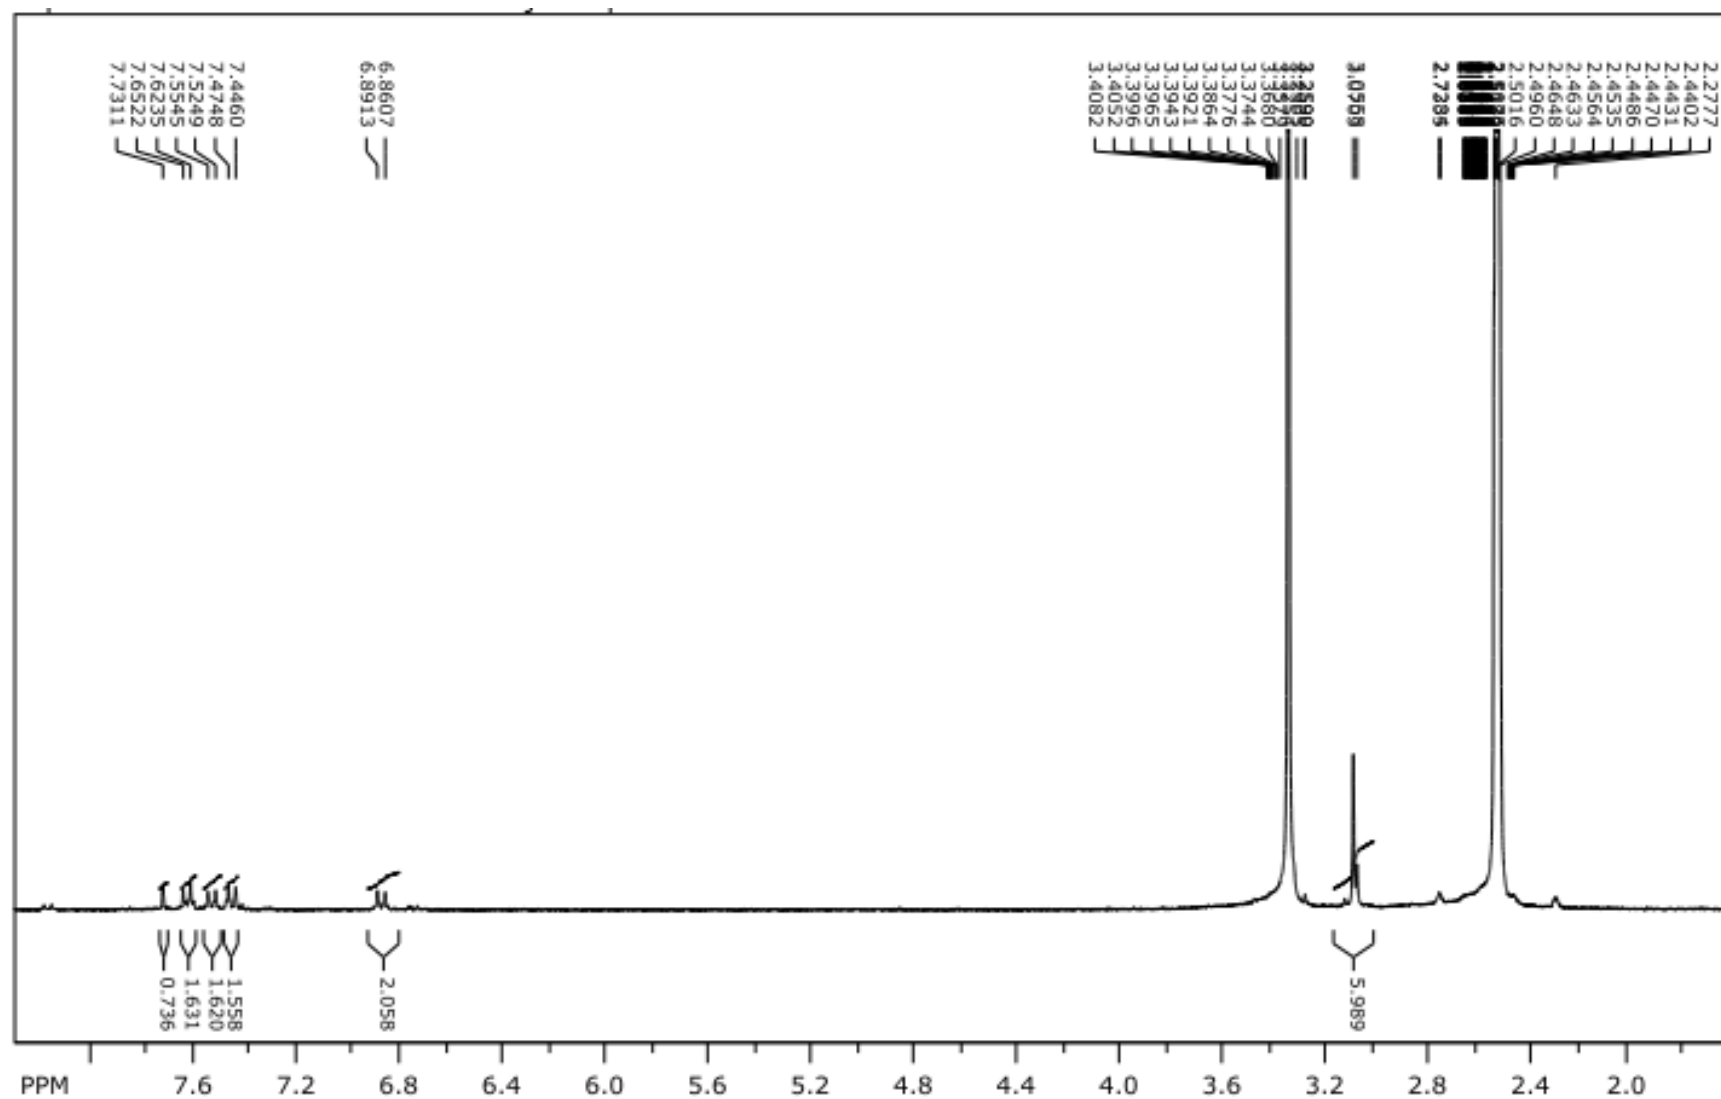

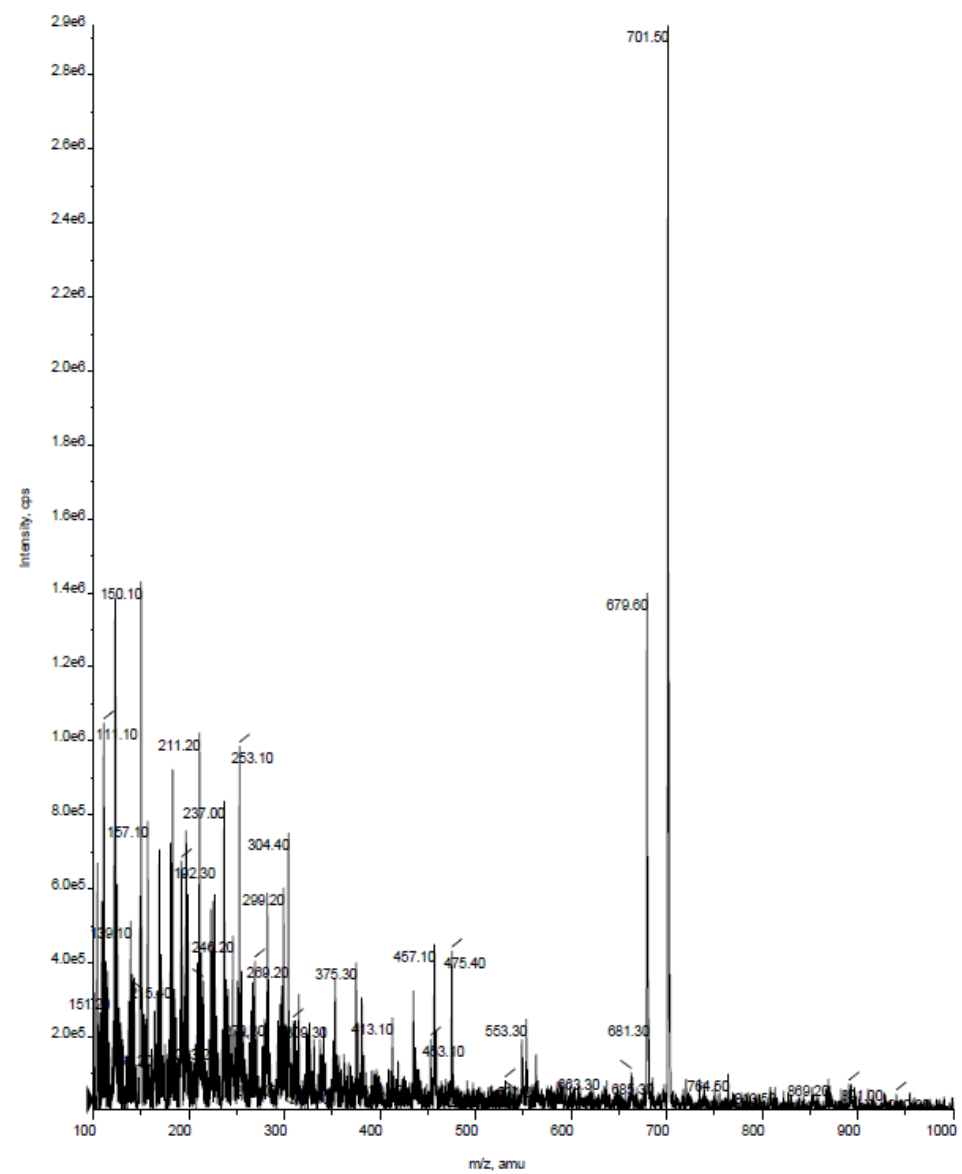

(Z)-3-(4-chlorophenyl)-5-(4-hydroxybenzylidene)-2-thioxothiazolidin-4-one (2n)

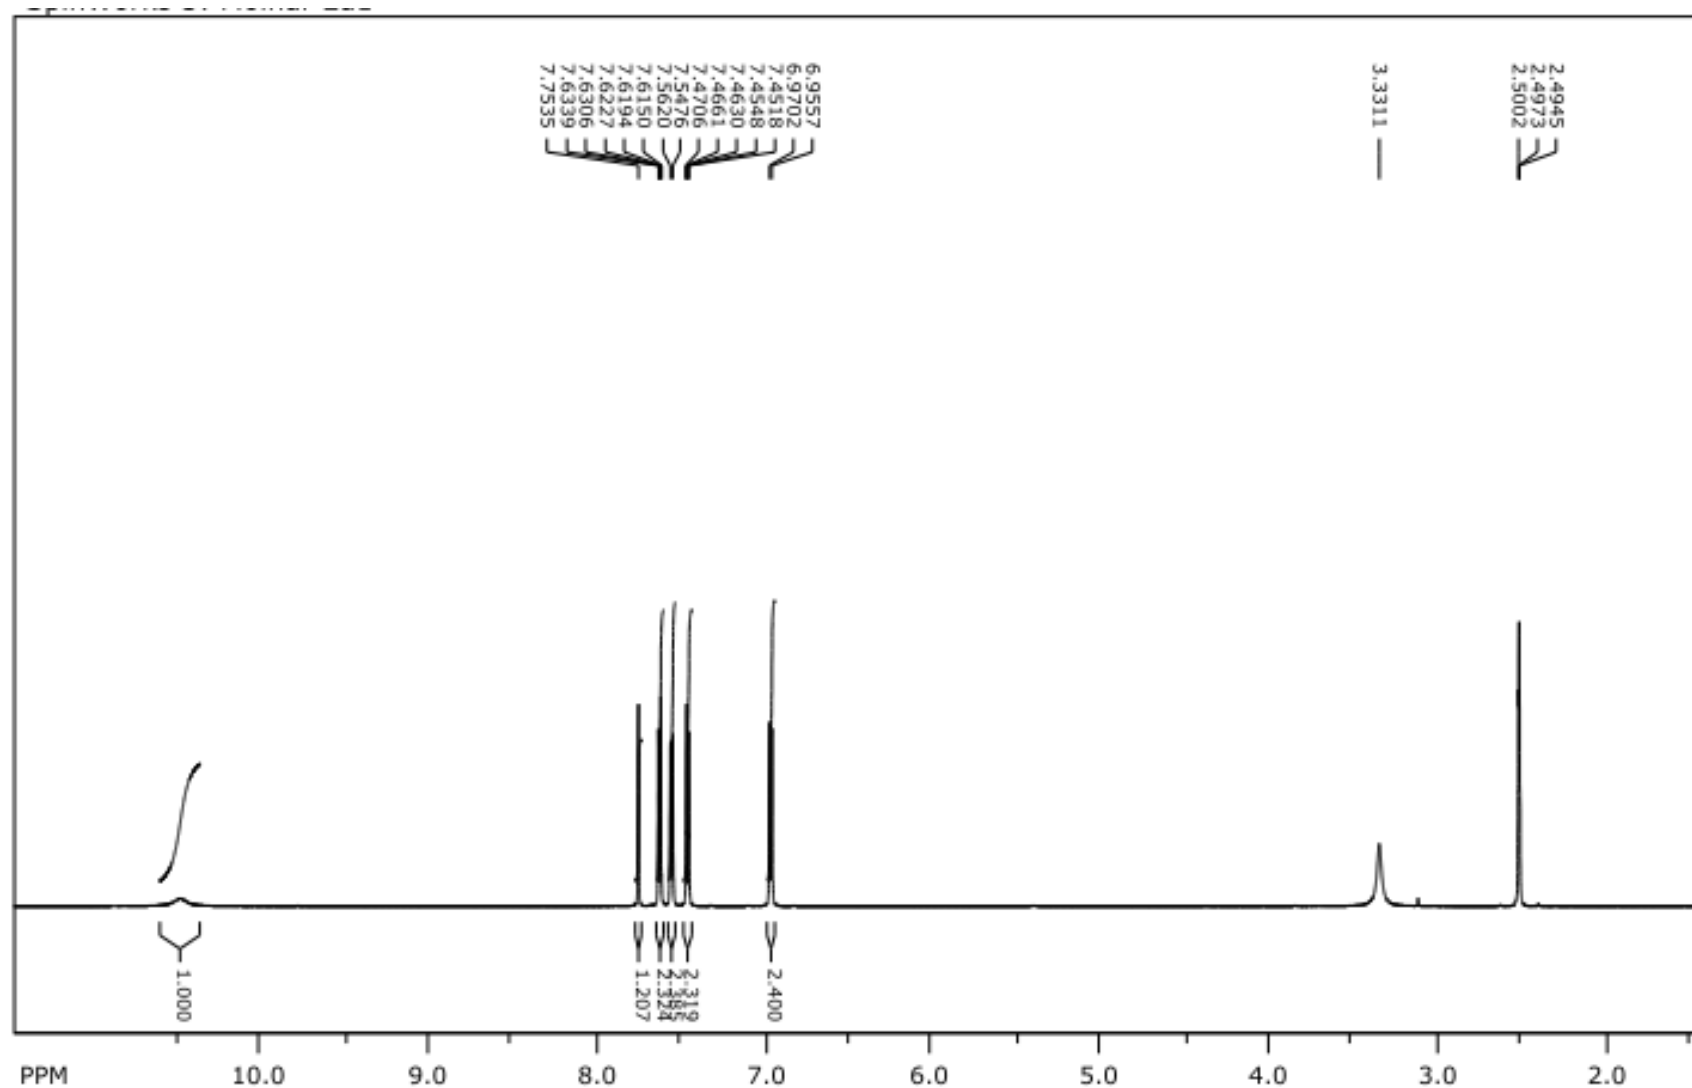

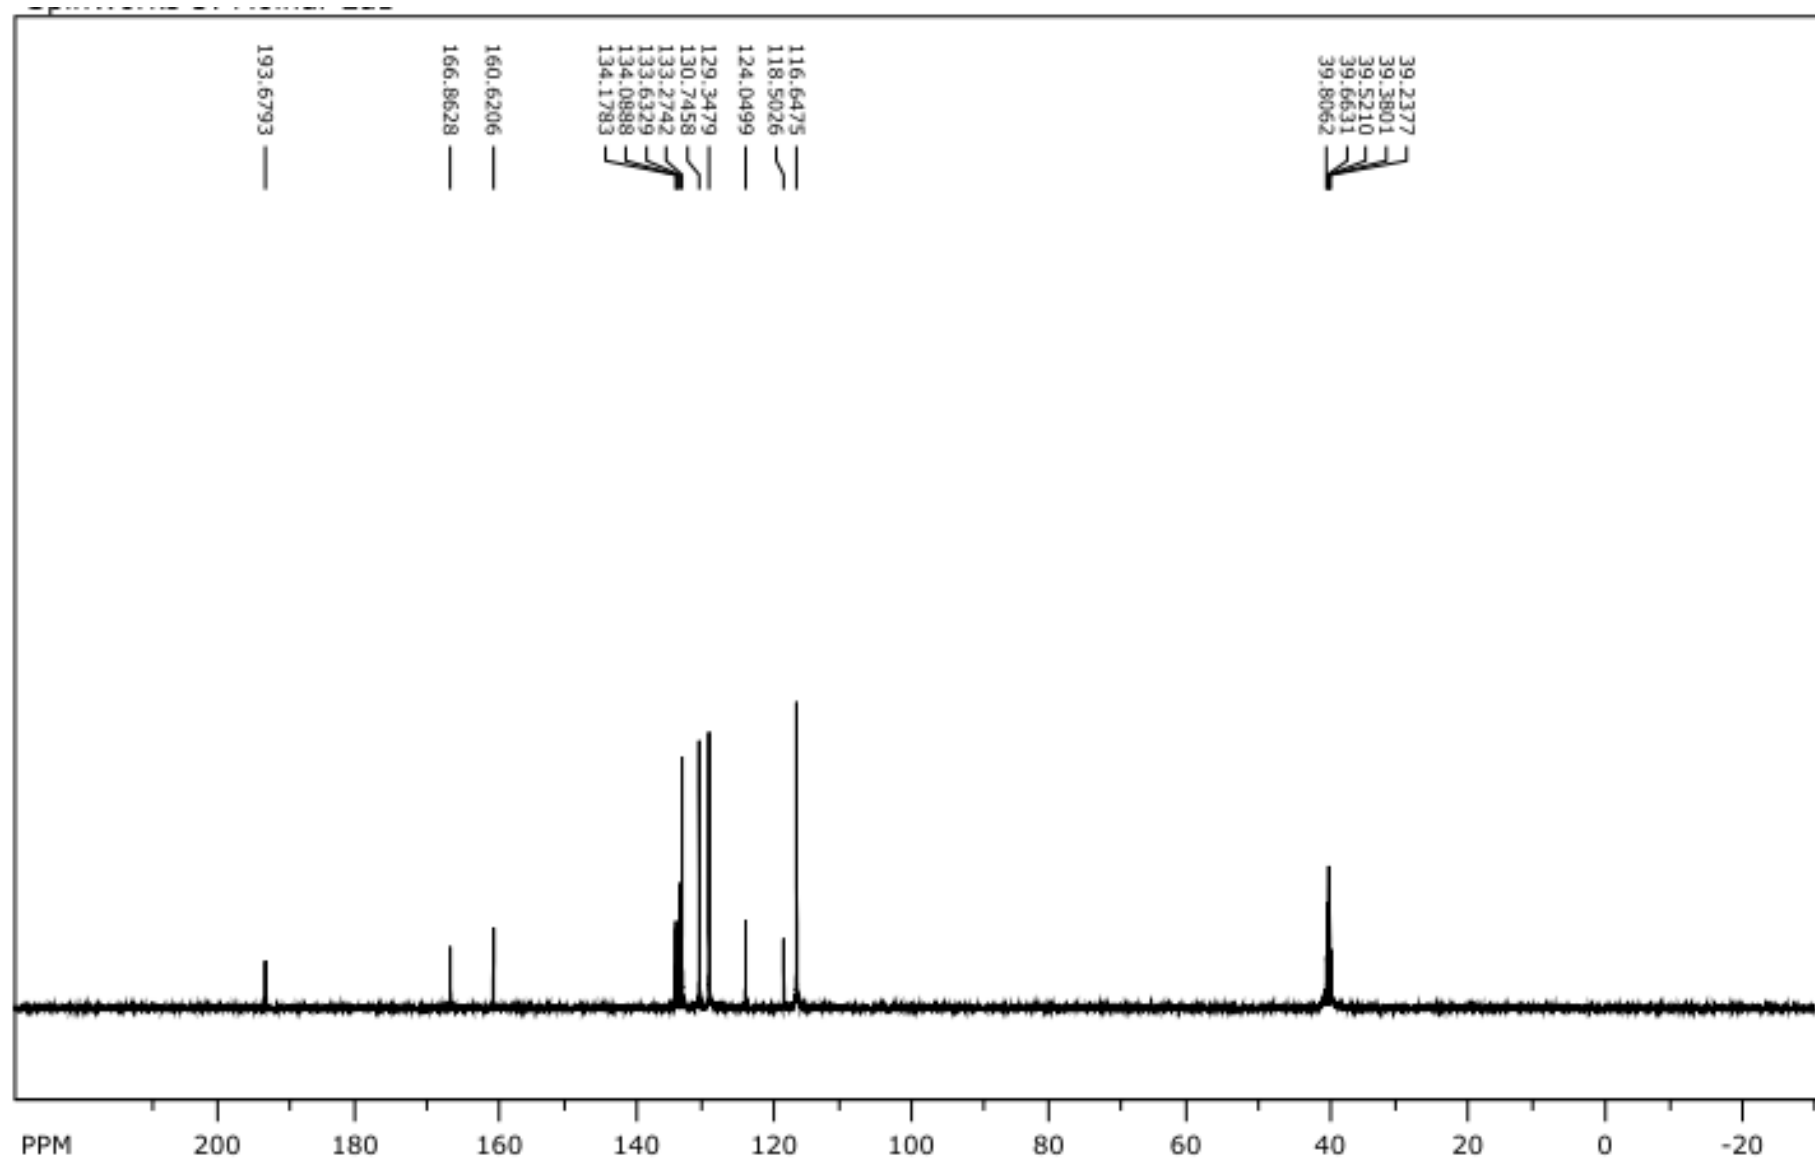



-Q1: 60 MCA scans from Sample 1 (054\_2a1) of 054\_2a1.wiff (Turbo Spray)

Max. 4.1e7 cps.

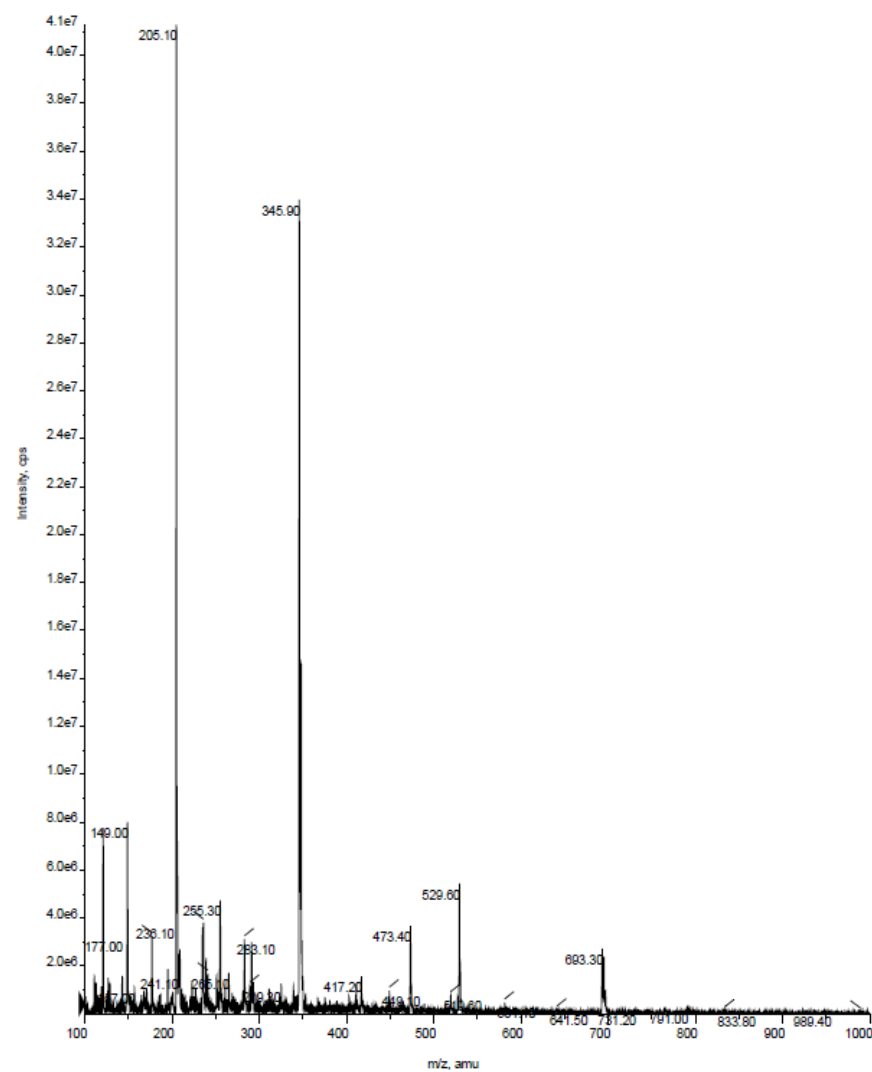

(Z)-3-(4-chlorophenyl)-5-(2,5-dimethoxybenzylidene)-2-thioxothiazolidin-4-one (2o)

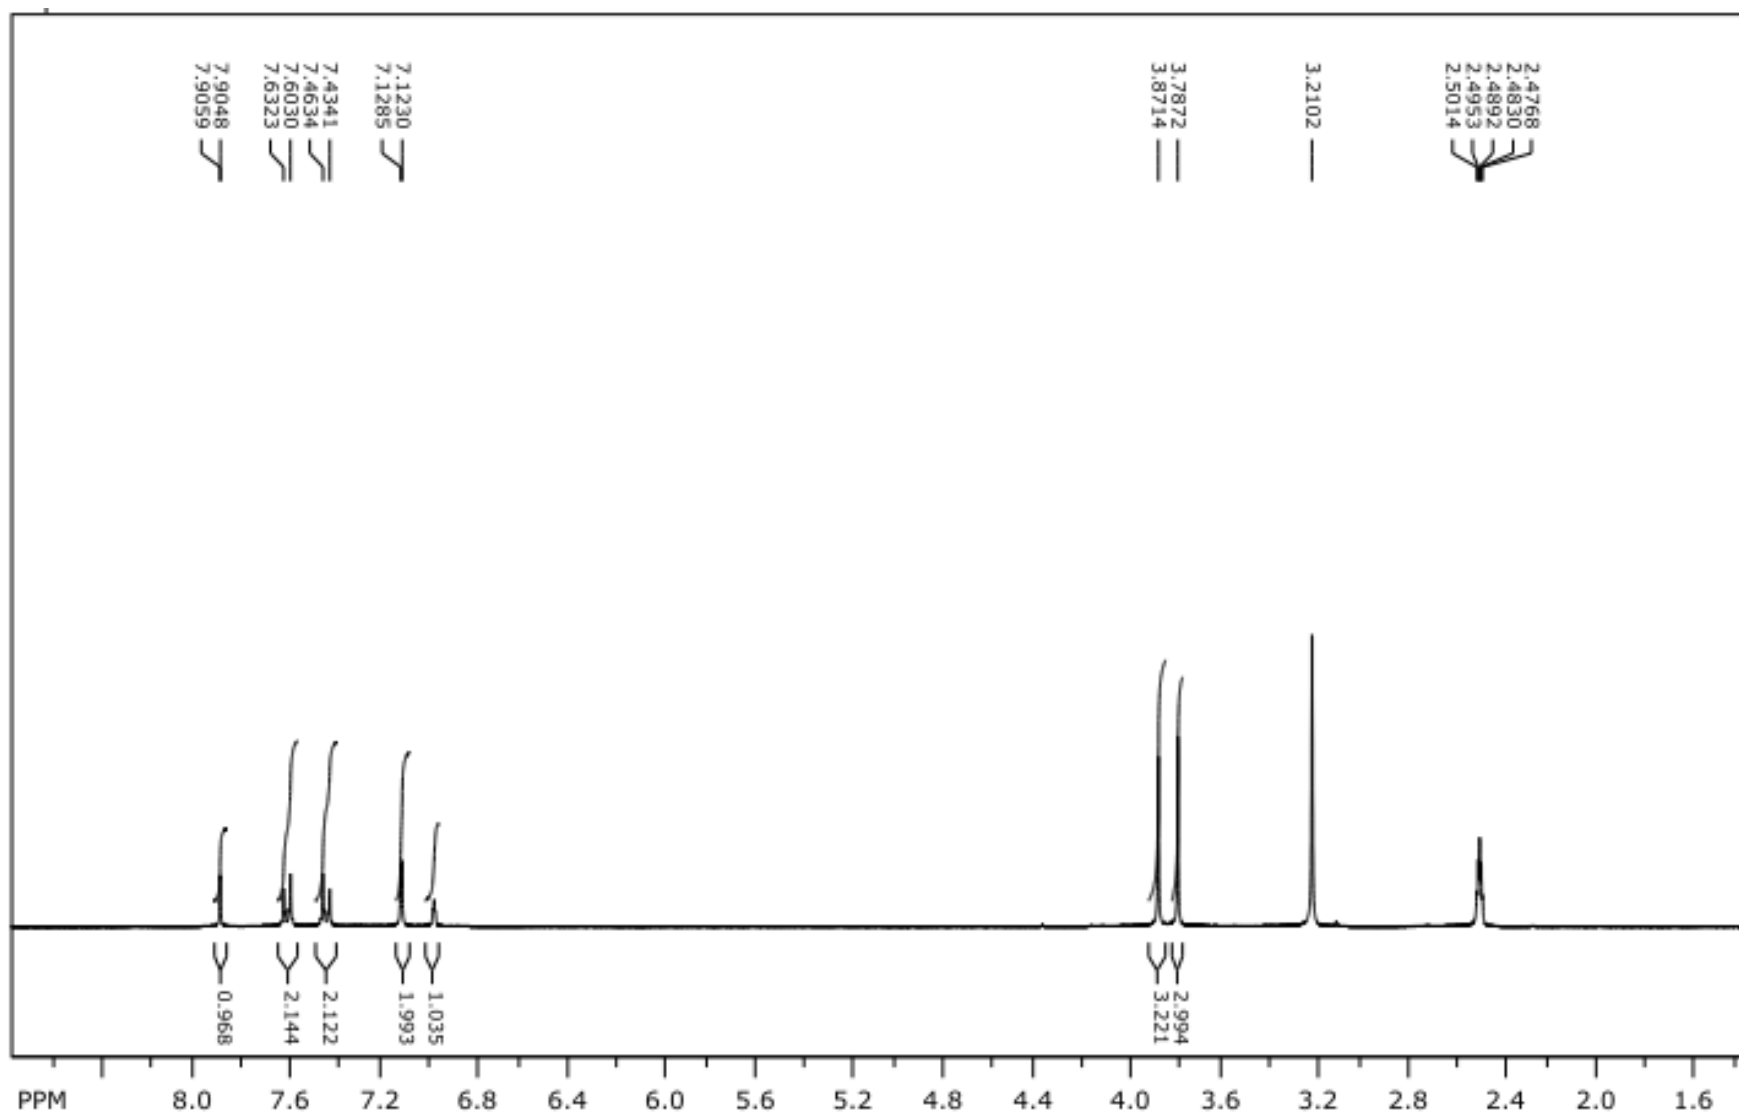

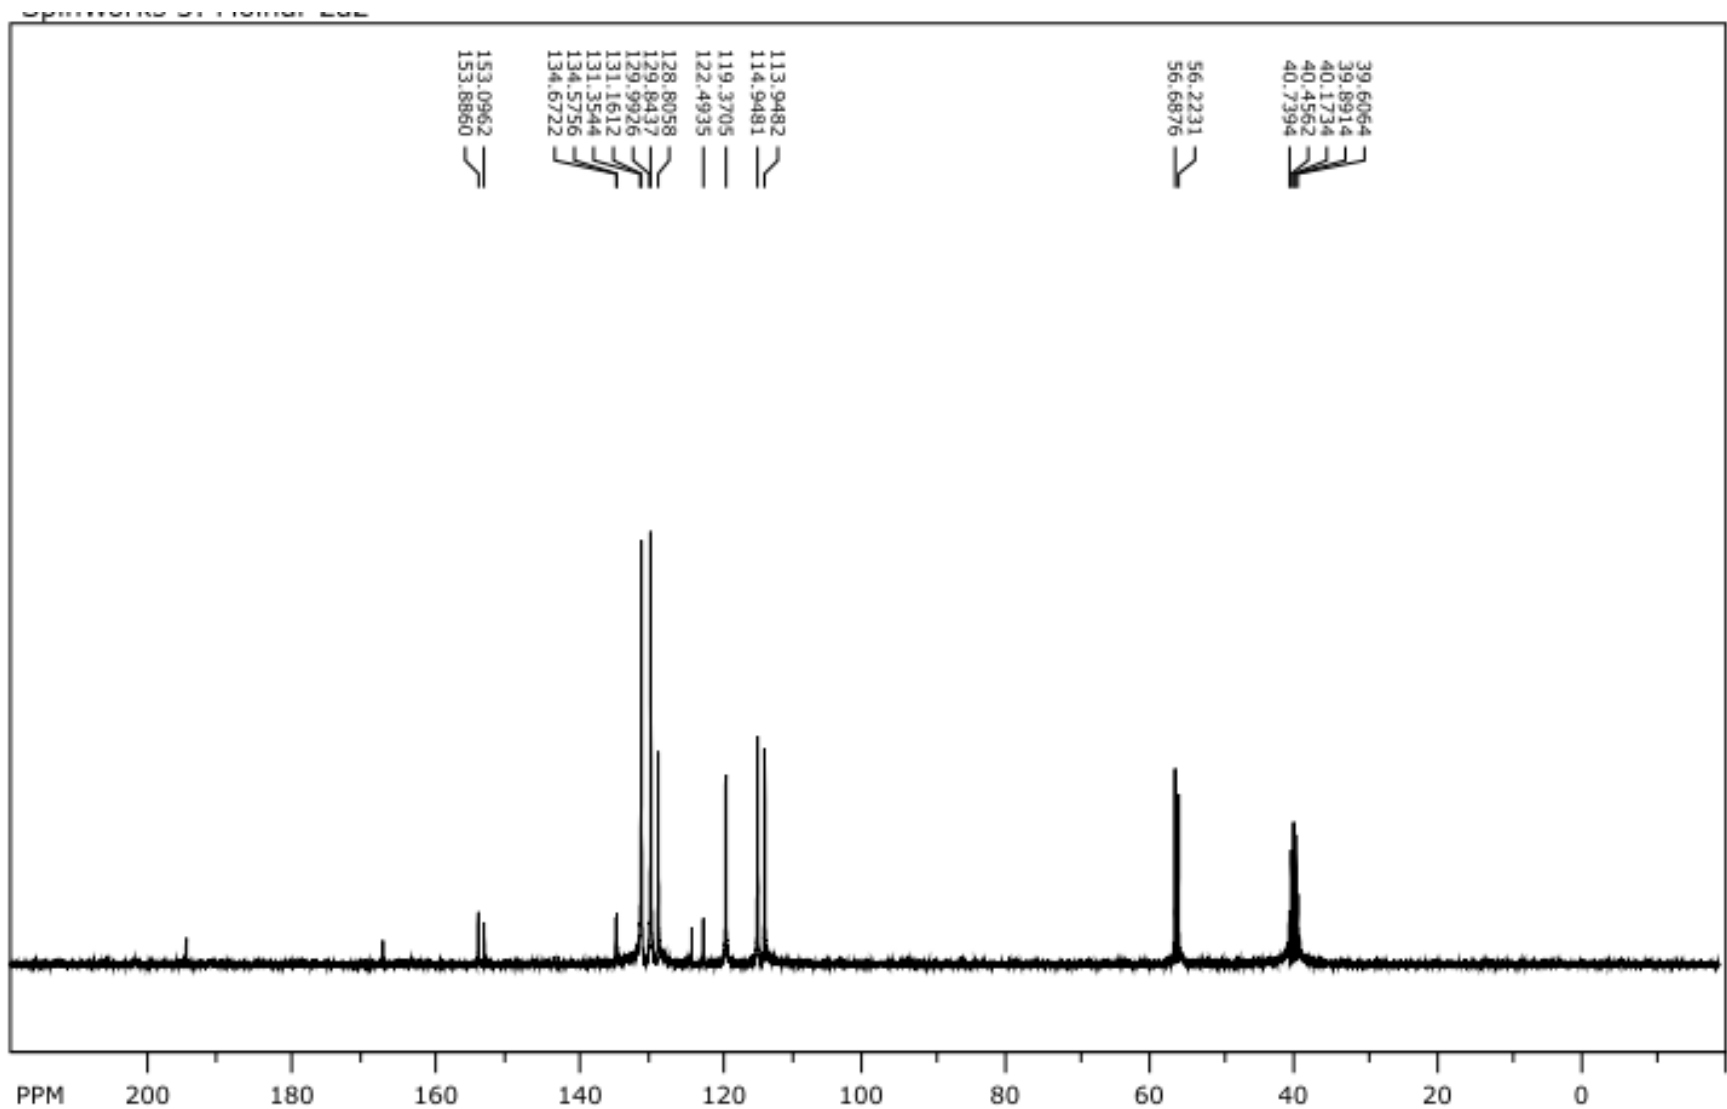

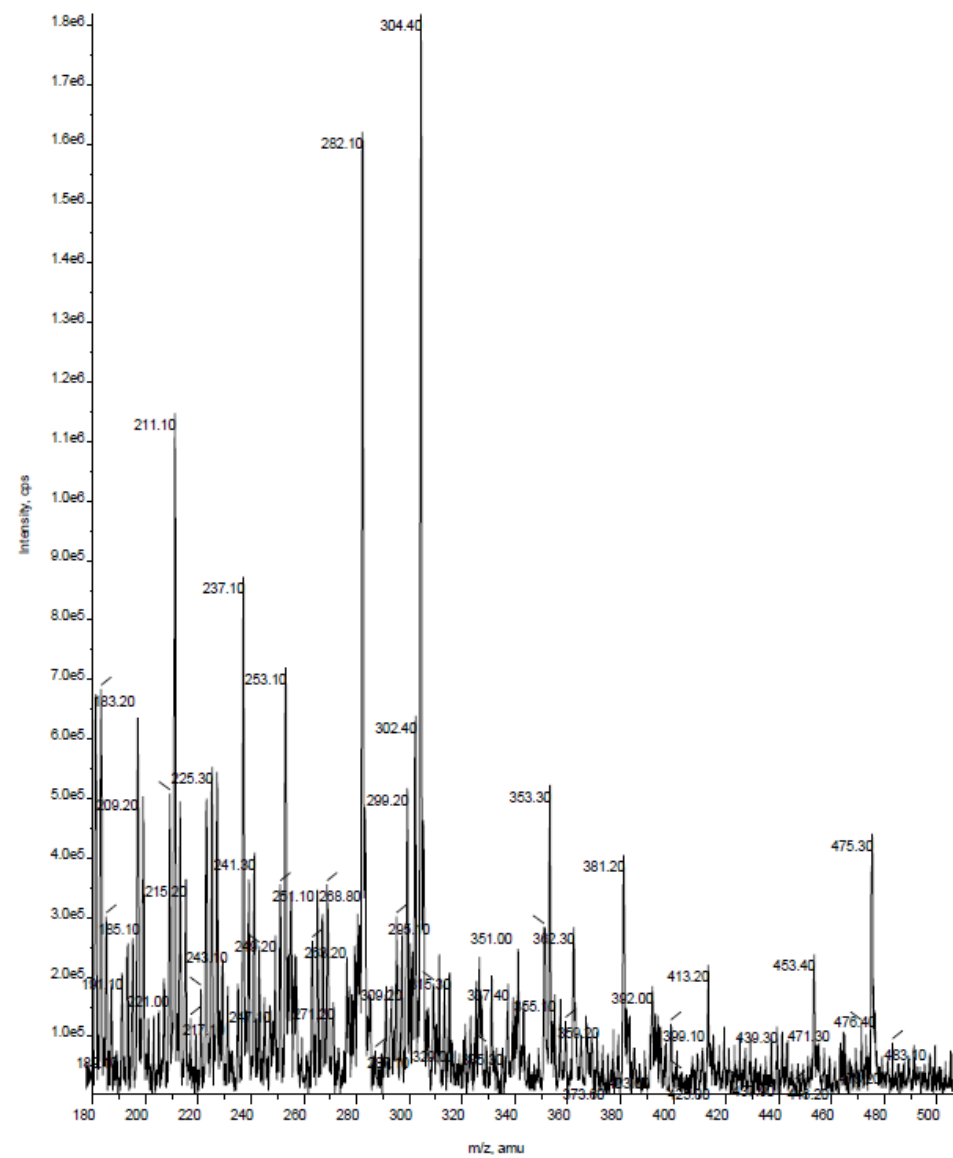

(Z)-2-(5-((1,3-di-*p*-tolyl-1H-pyrazol-4-yl)methylene)-4-oxo-2-thioxothiazolidin-3-yl)acetic acid (3a)

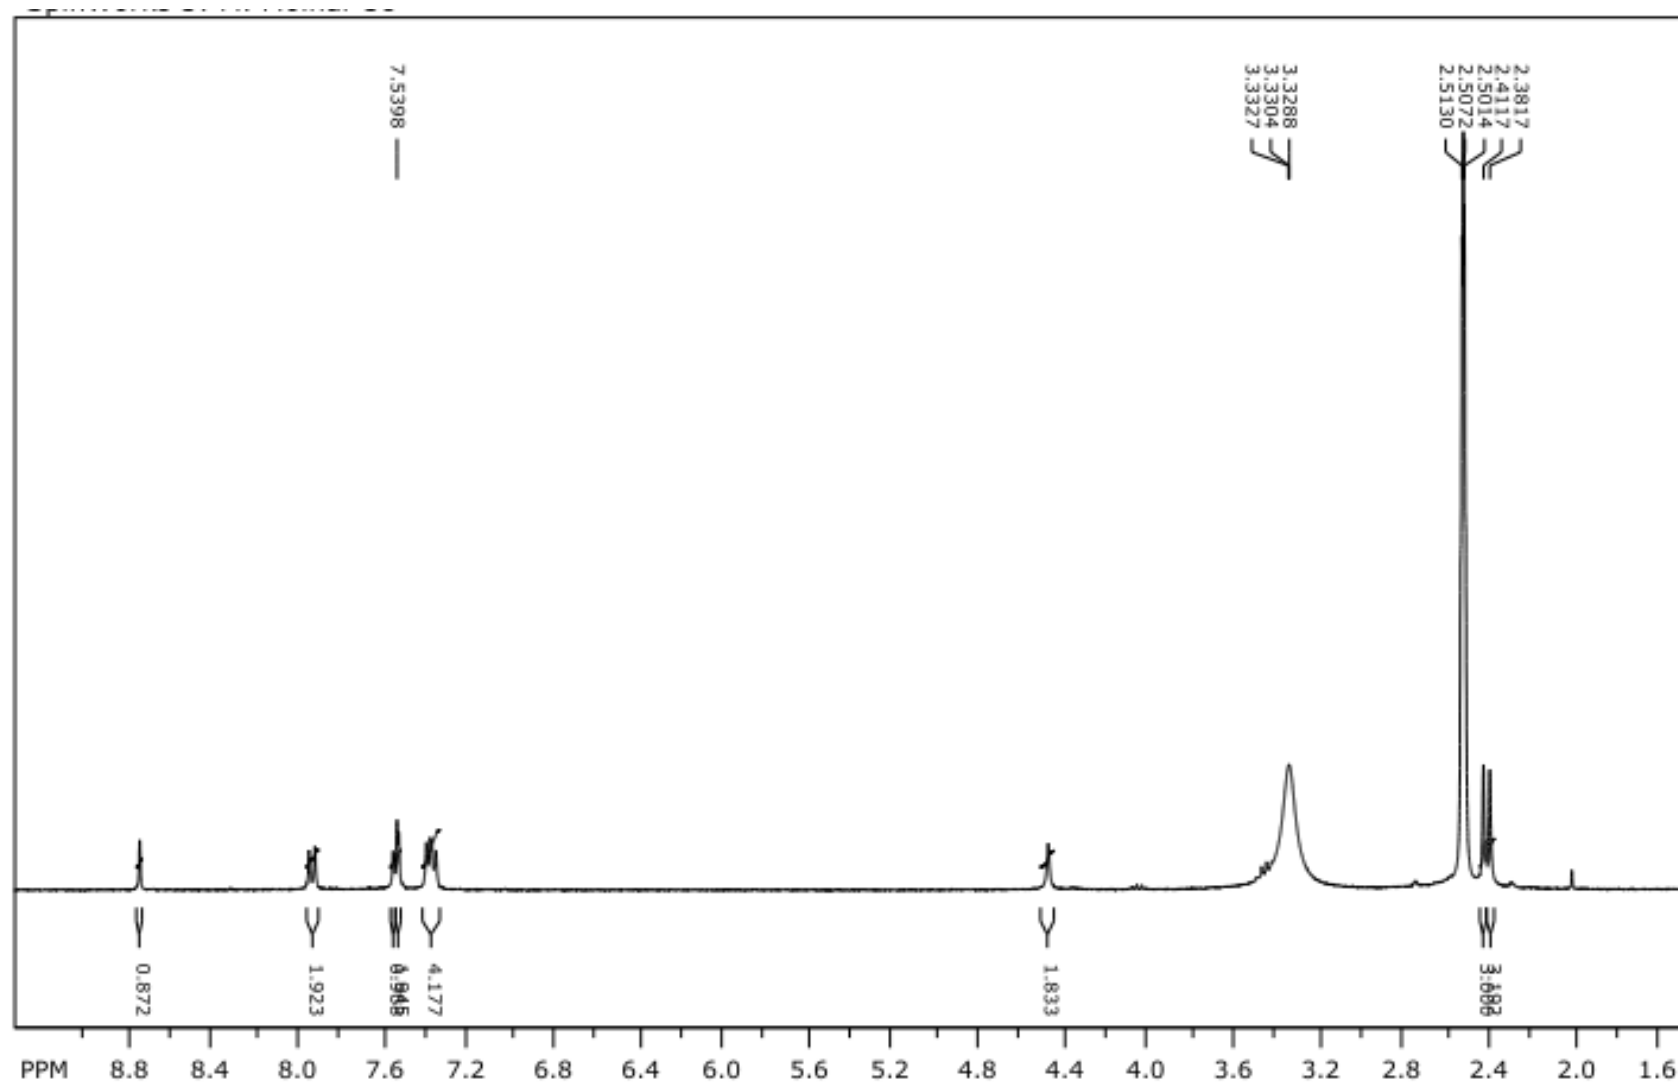

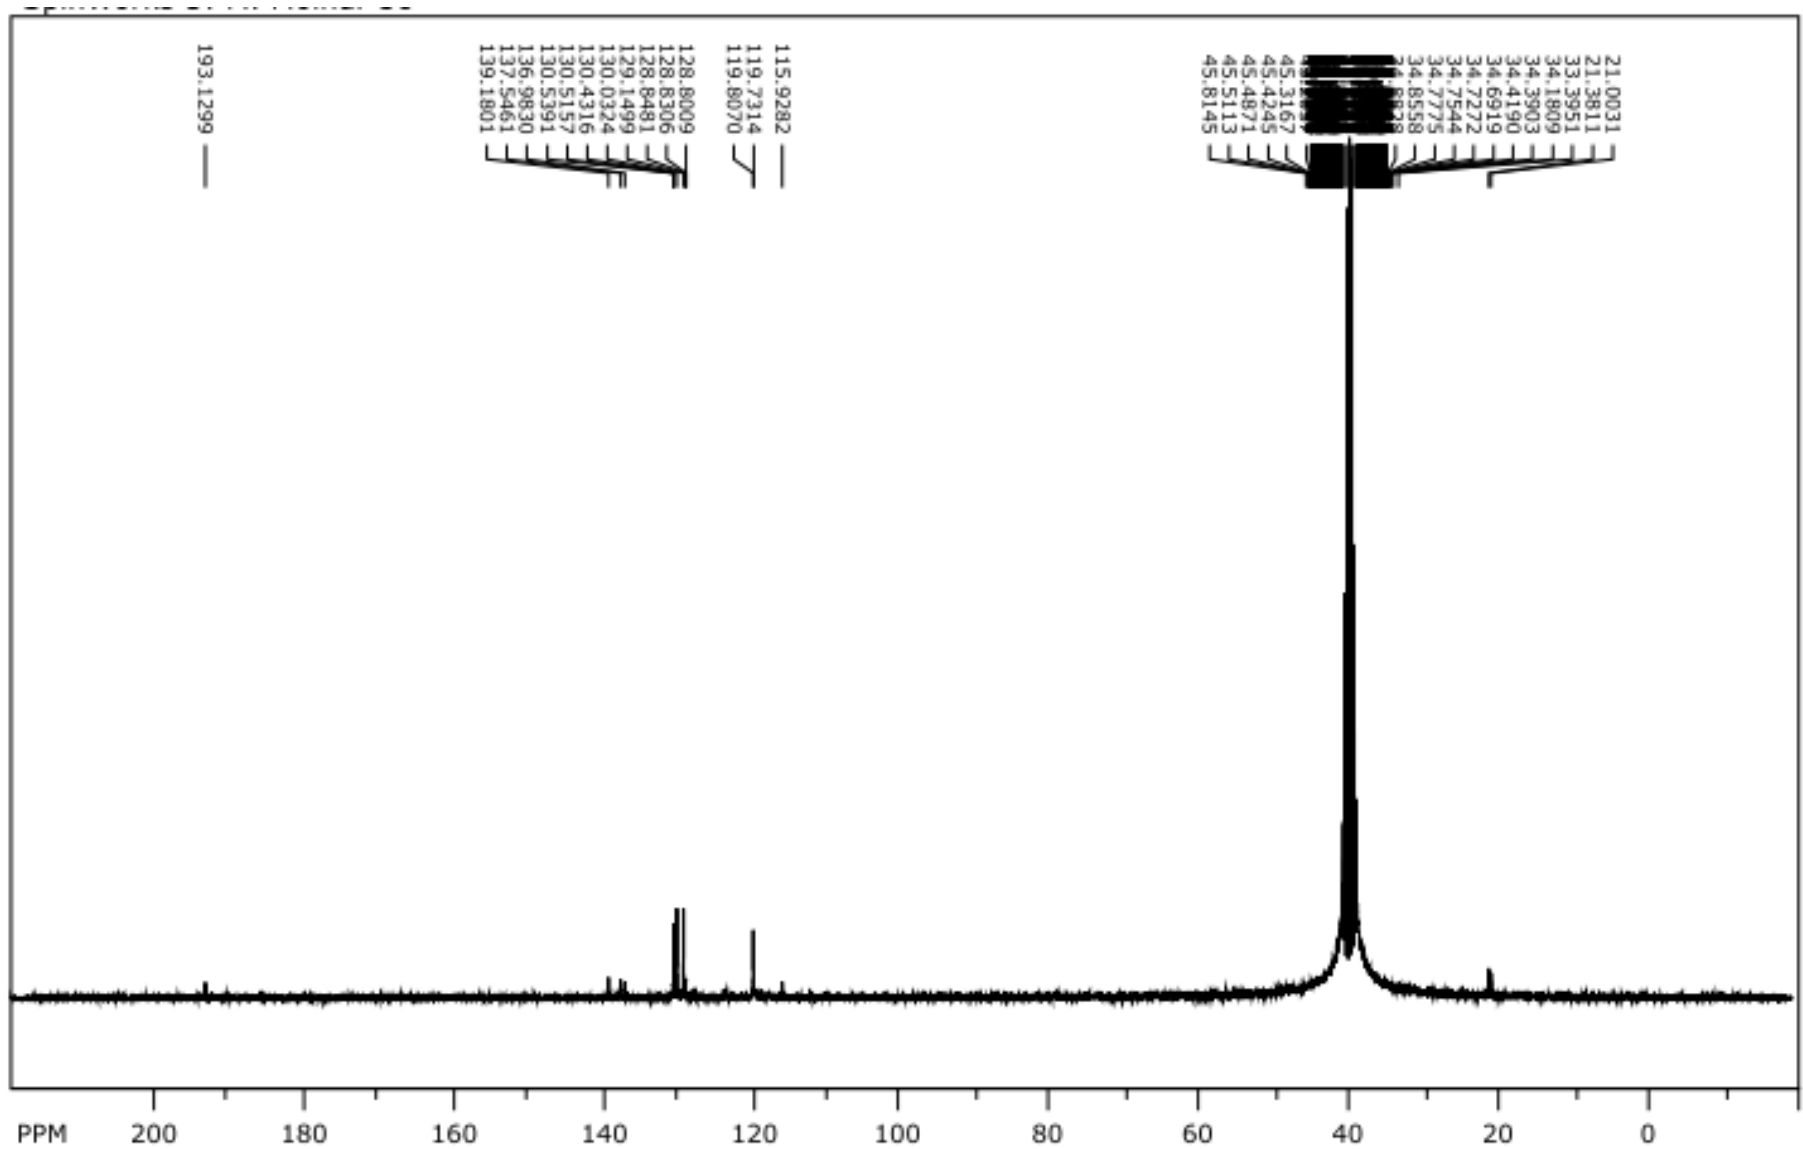

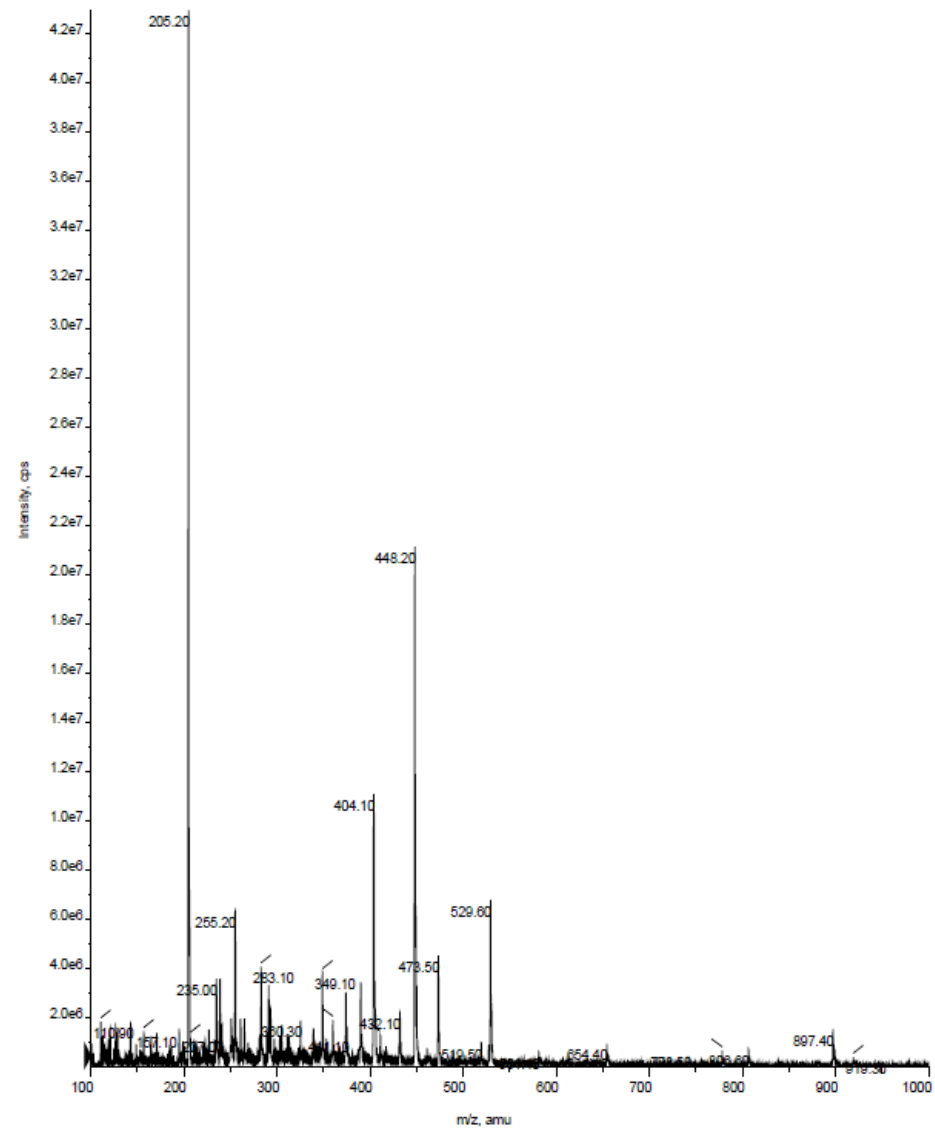

(Z)-2-(5-((3-(4-fluorophenyl)-1-(*p*-tolyl)-1*H*-pyrazol-4-yl)methylene)-4-oxo-2-thioxothiazolidin-3-yl)acetic acid (3b)

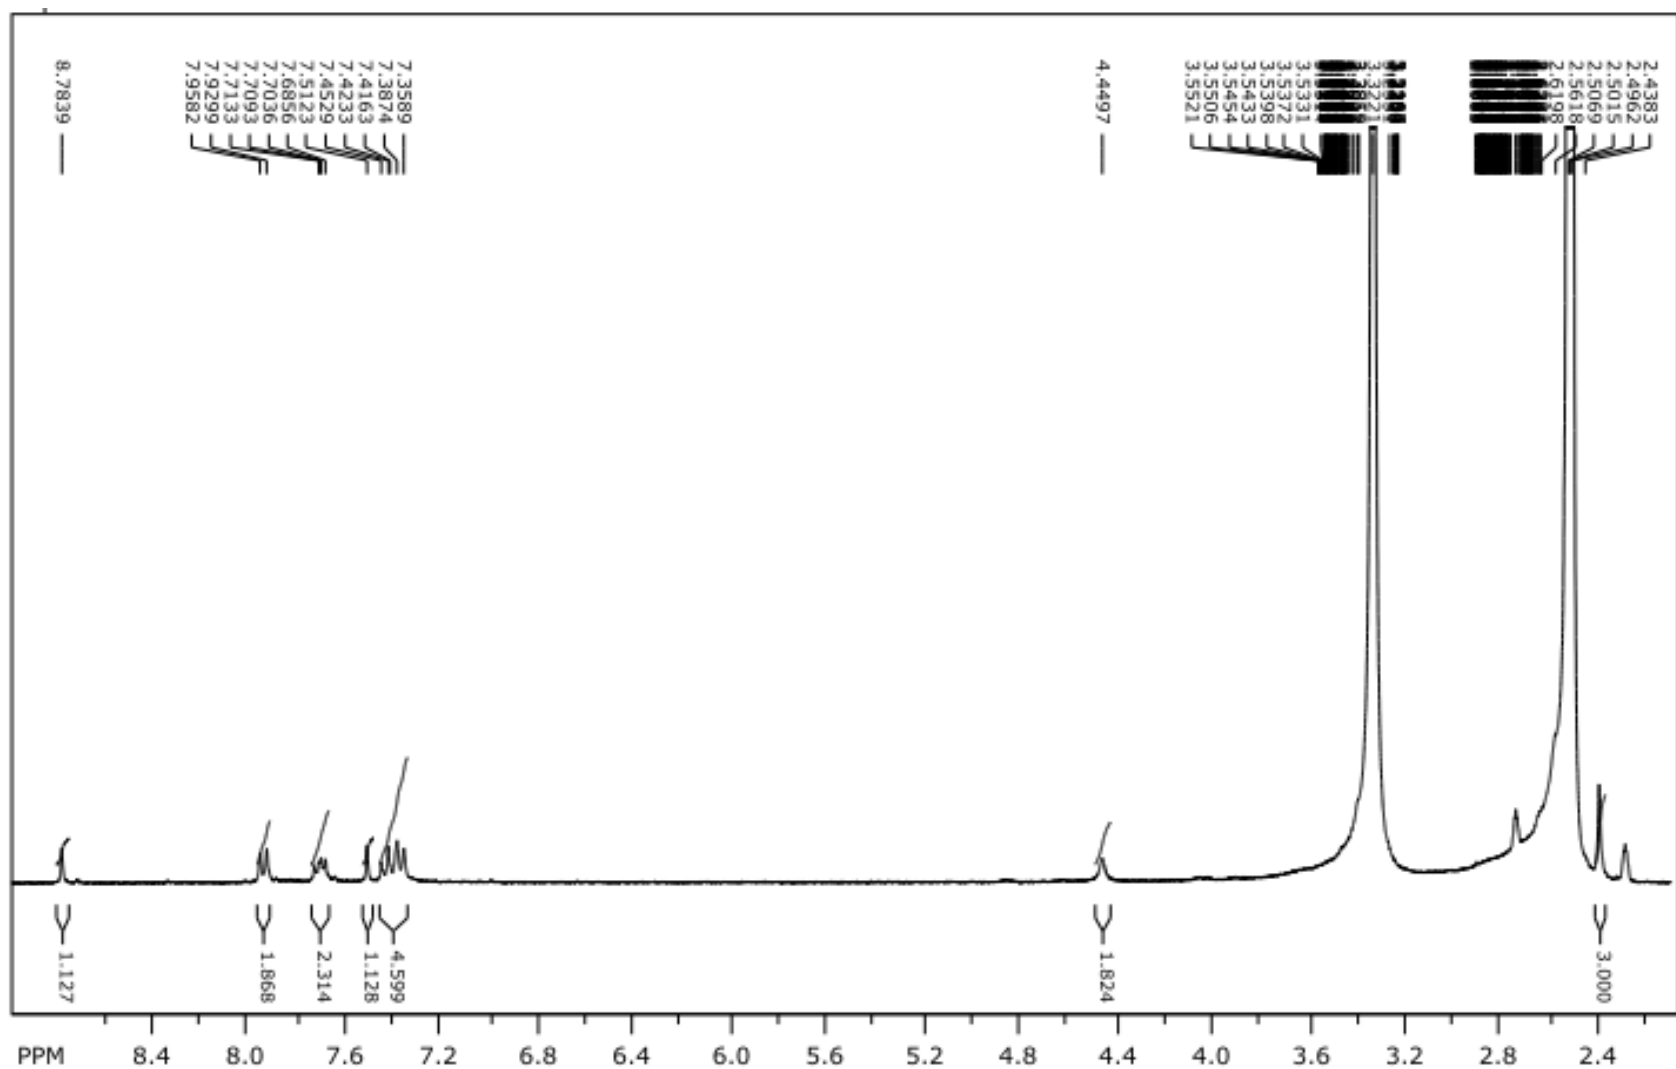



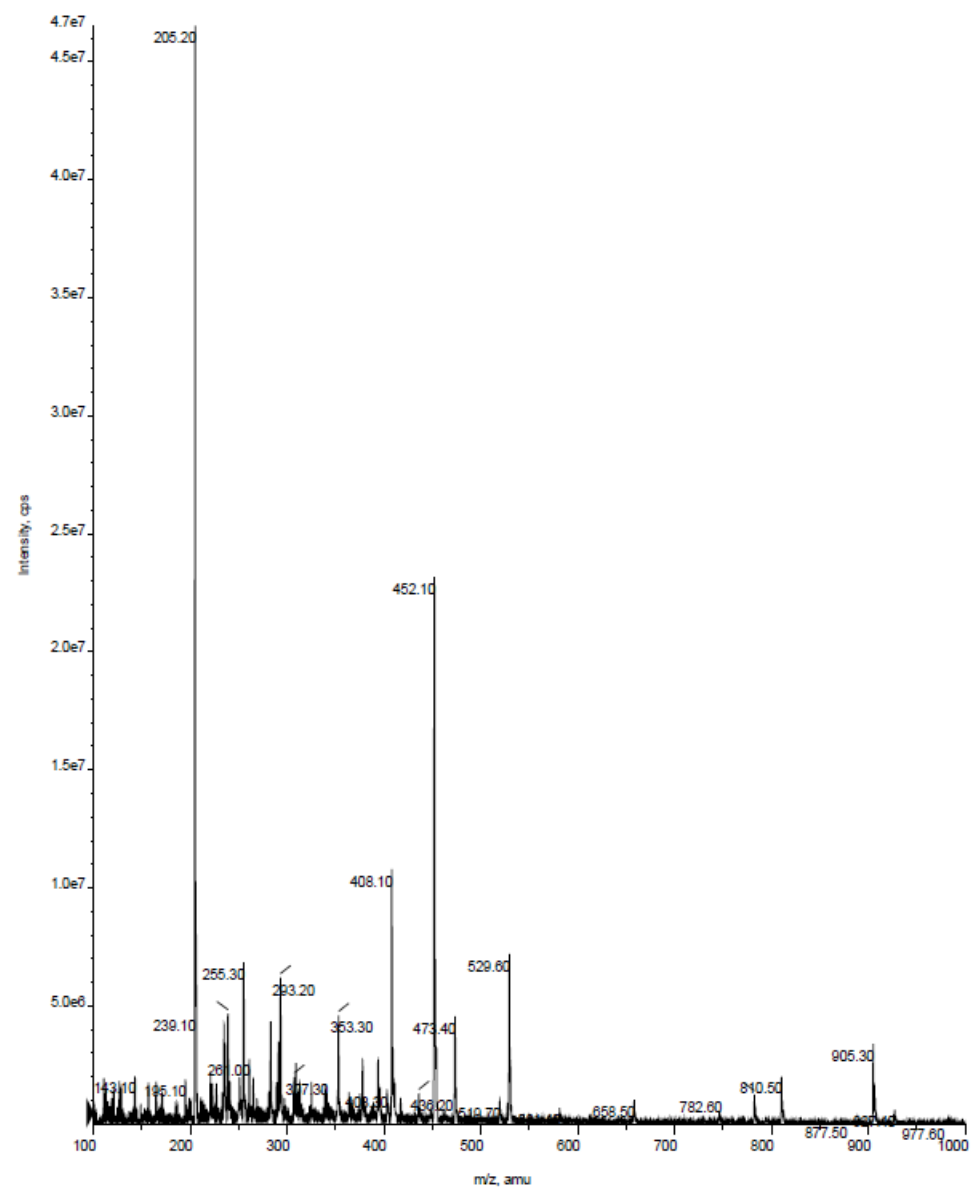

(Z)-2-(5-((3-(4-methoxyphenyl)-1-(*p*-tolyl)-1*H*-pyrazol-4-yl)methylene)-4-oxo-2-thioxothiazolidin-3-yl)acetic acid (3c)

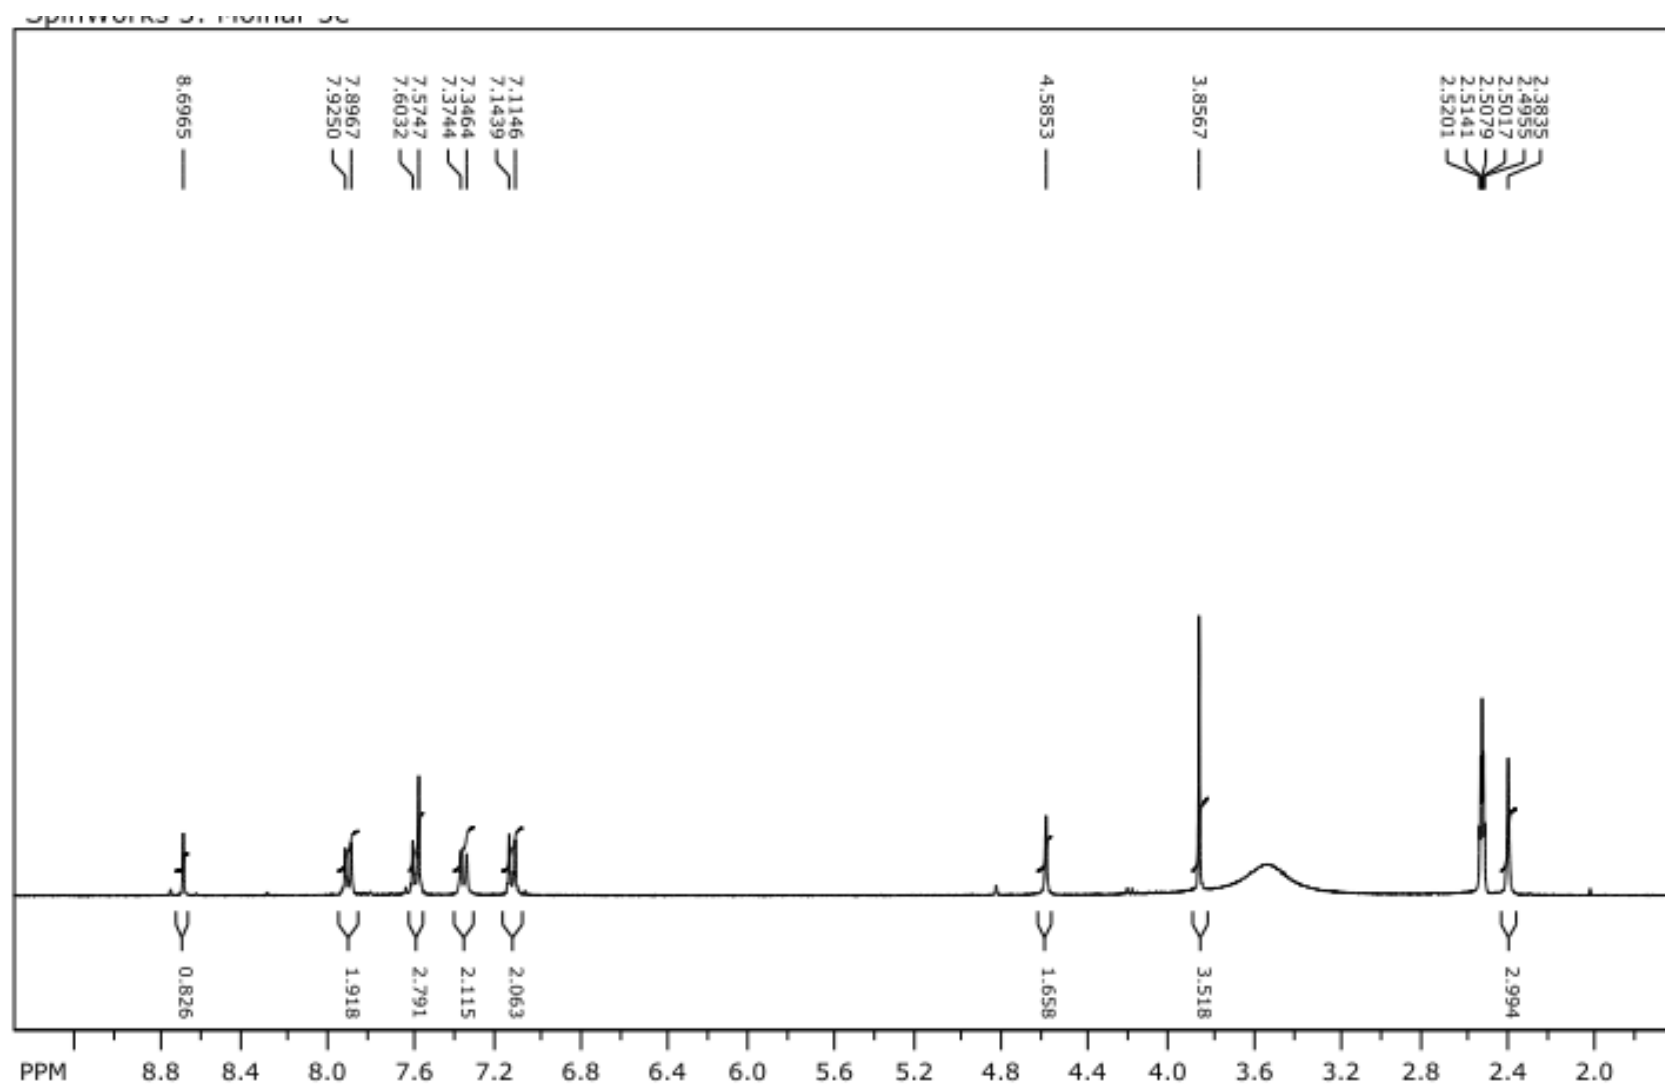

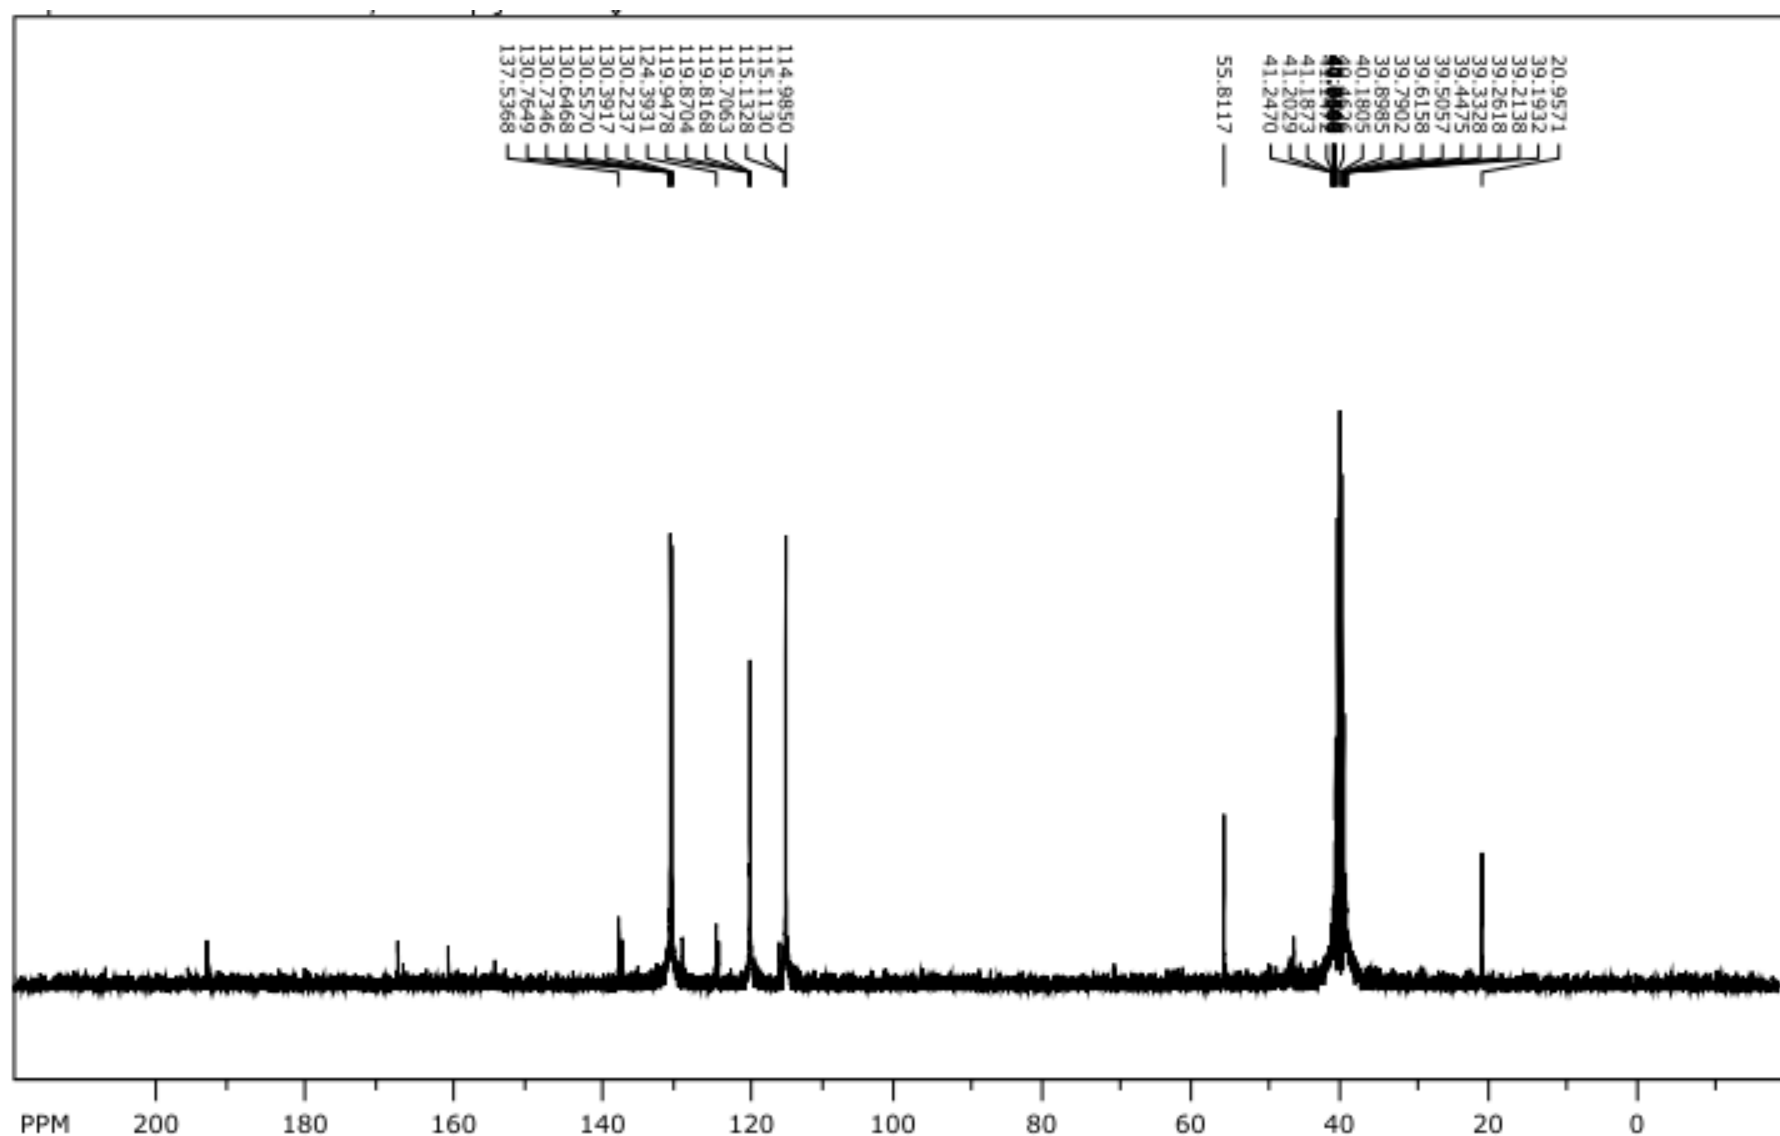

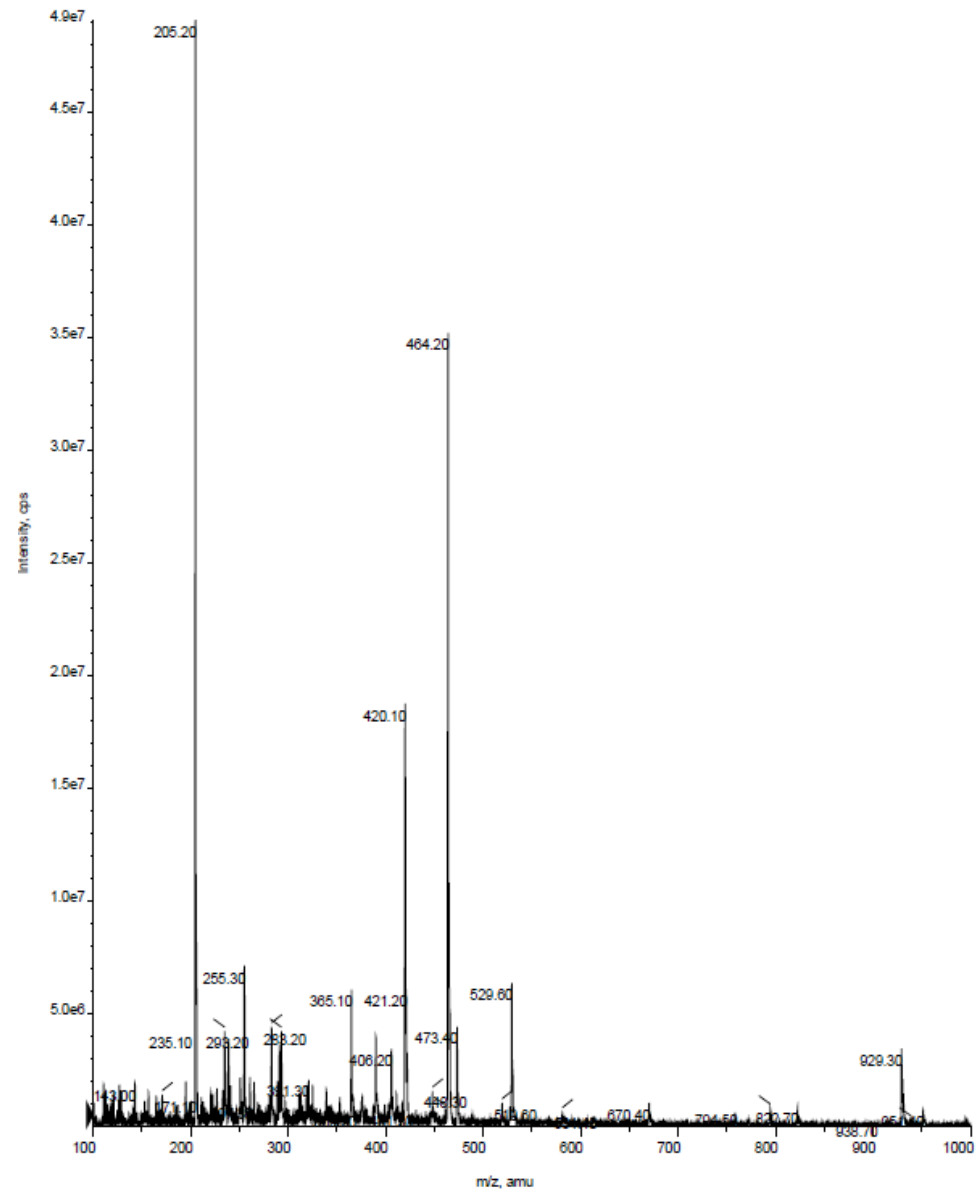

(Z)-2-(5-((3-(4-chlorophenyl)-1-(*p*-tolyl)-1*H*-pyrazol-4-yl)methylene)-4-oxo-2-thioxothiazolidin-3-yl)acetic acid (3d)

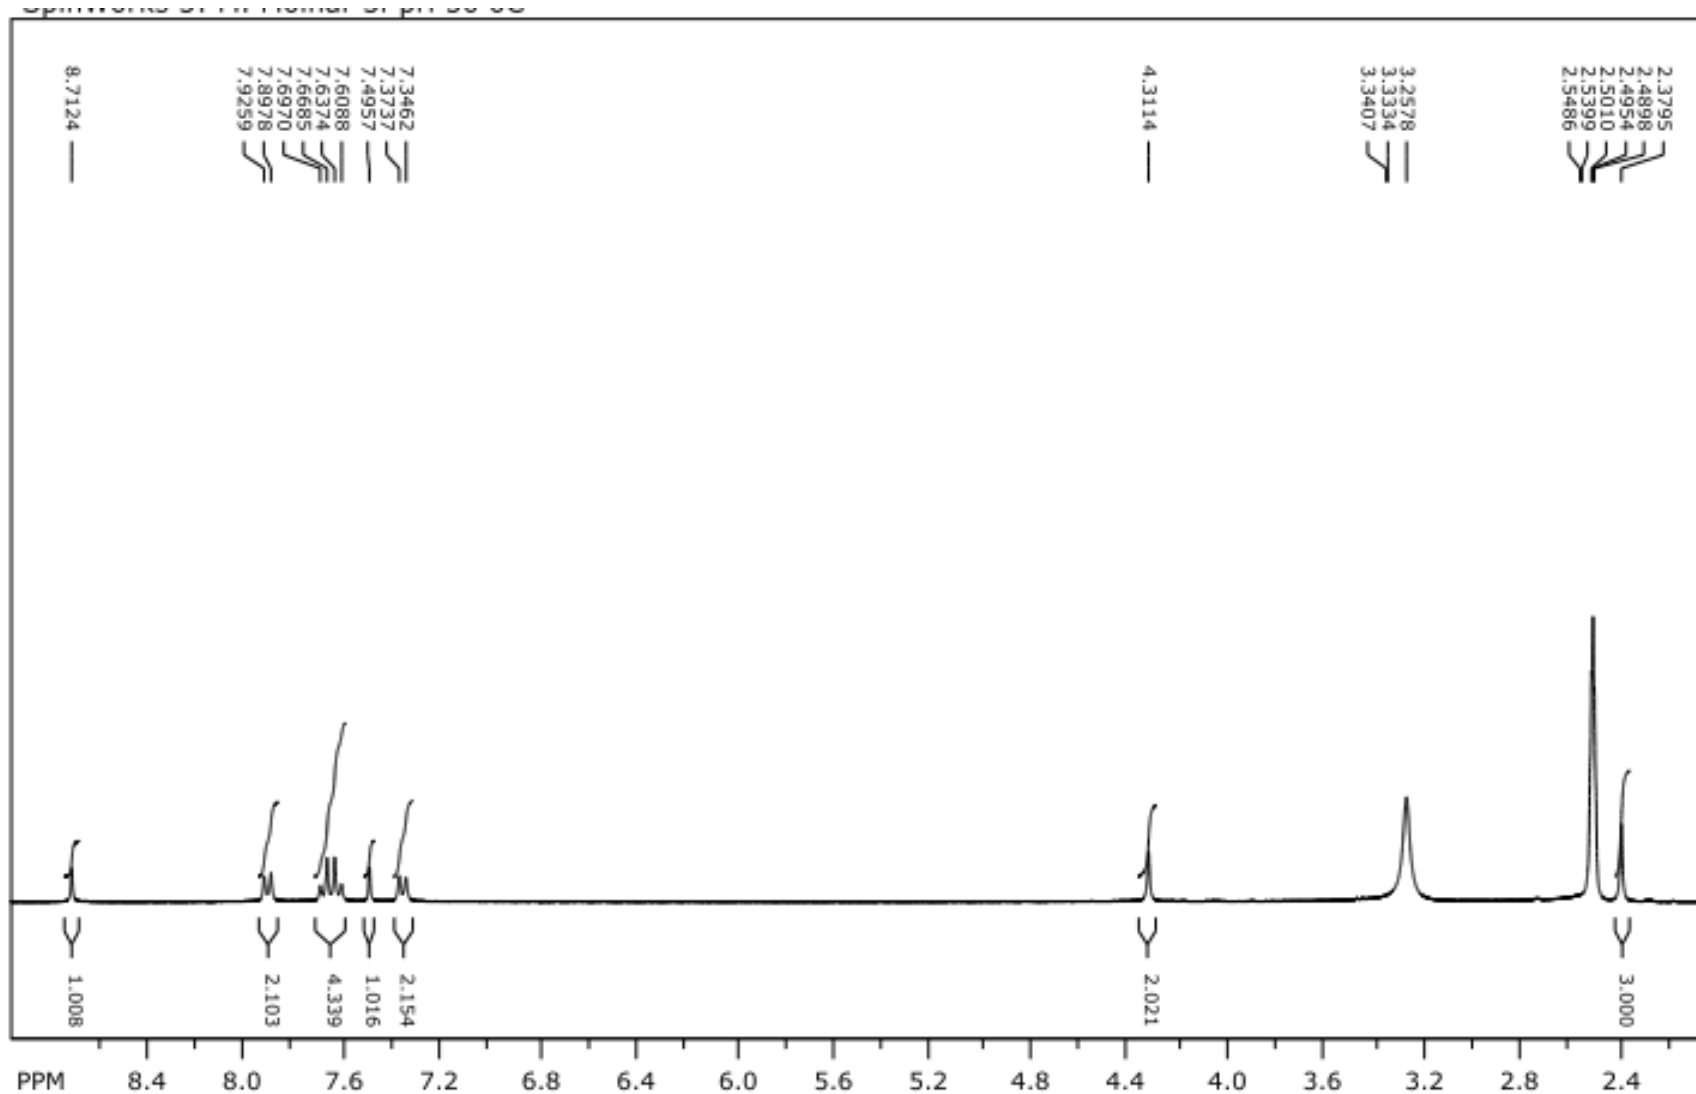

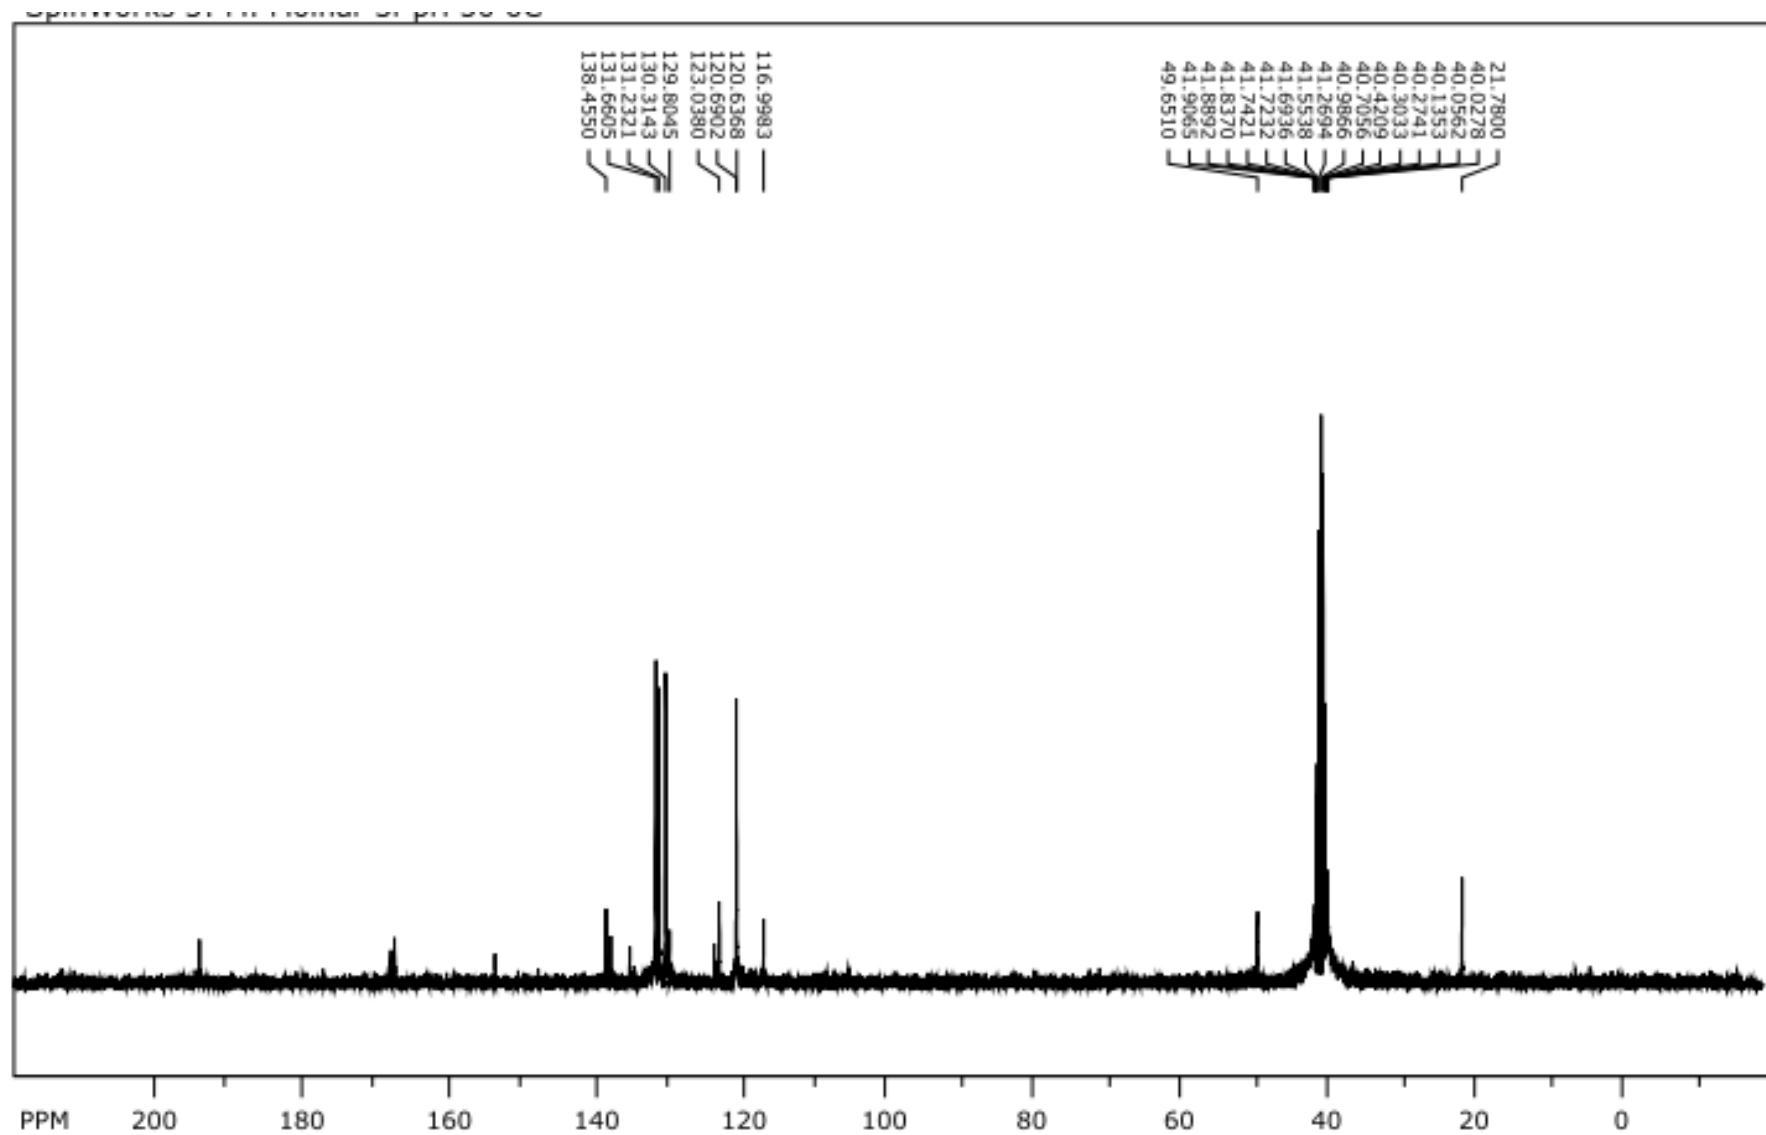

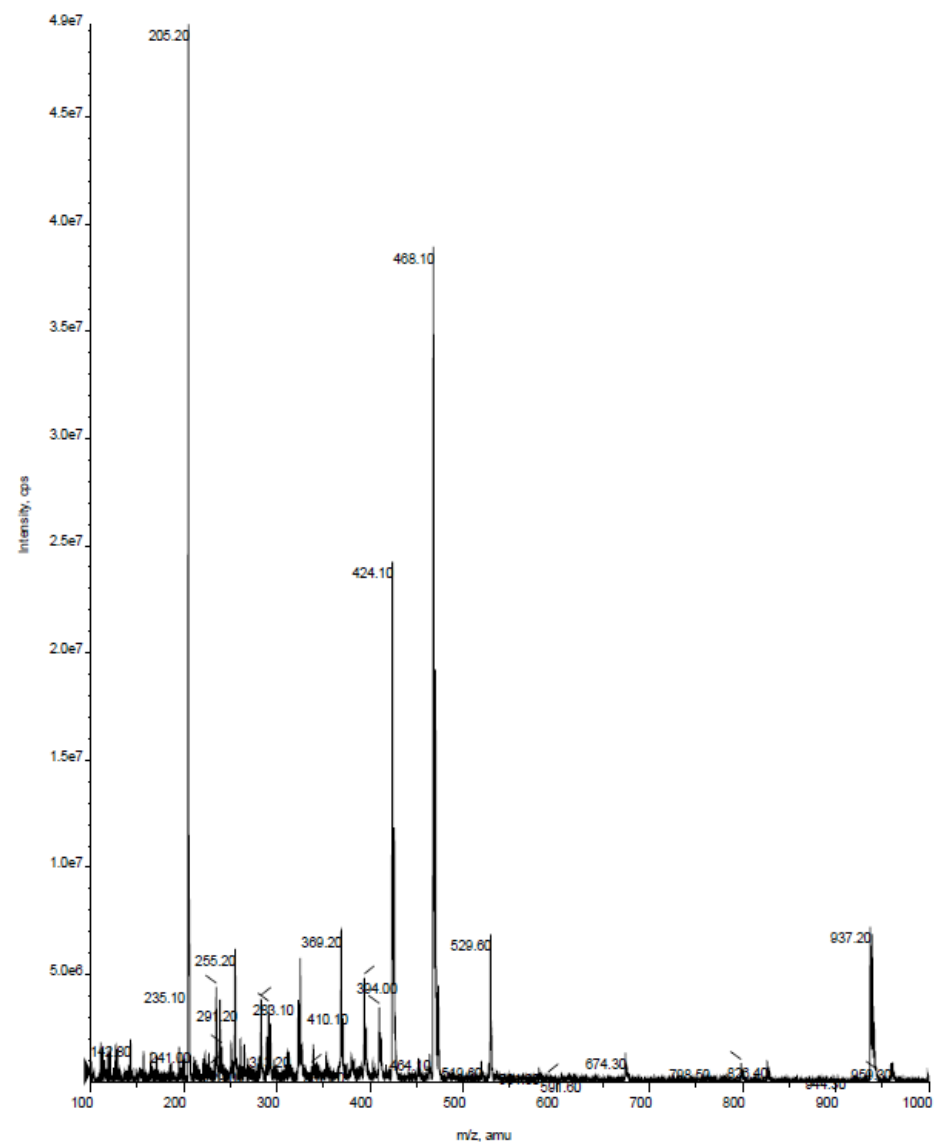

[illegible]



Spinworks 3.11.10.0000 31.01.2010 10:00

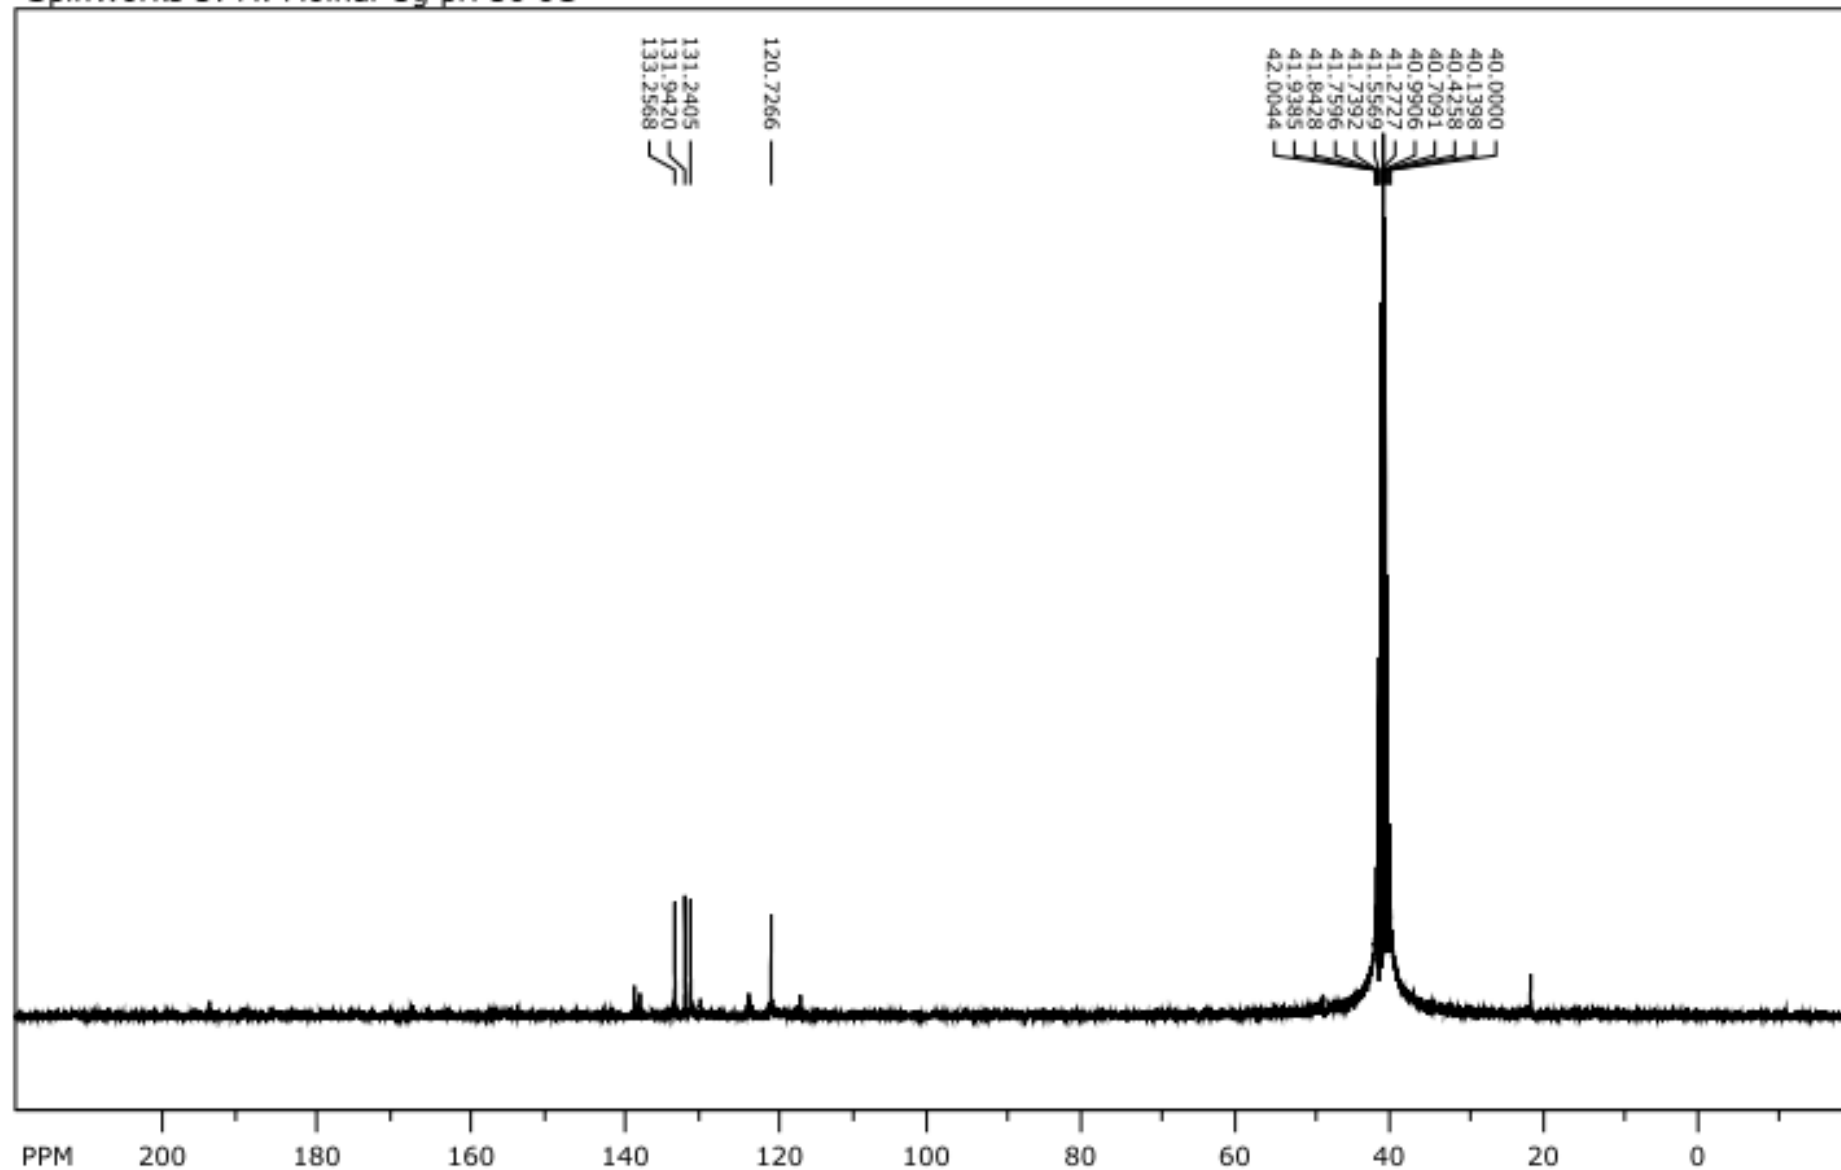

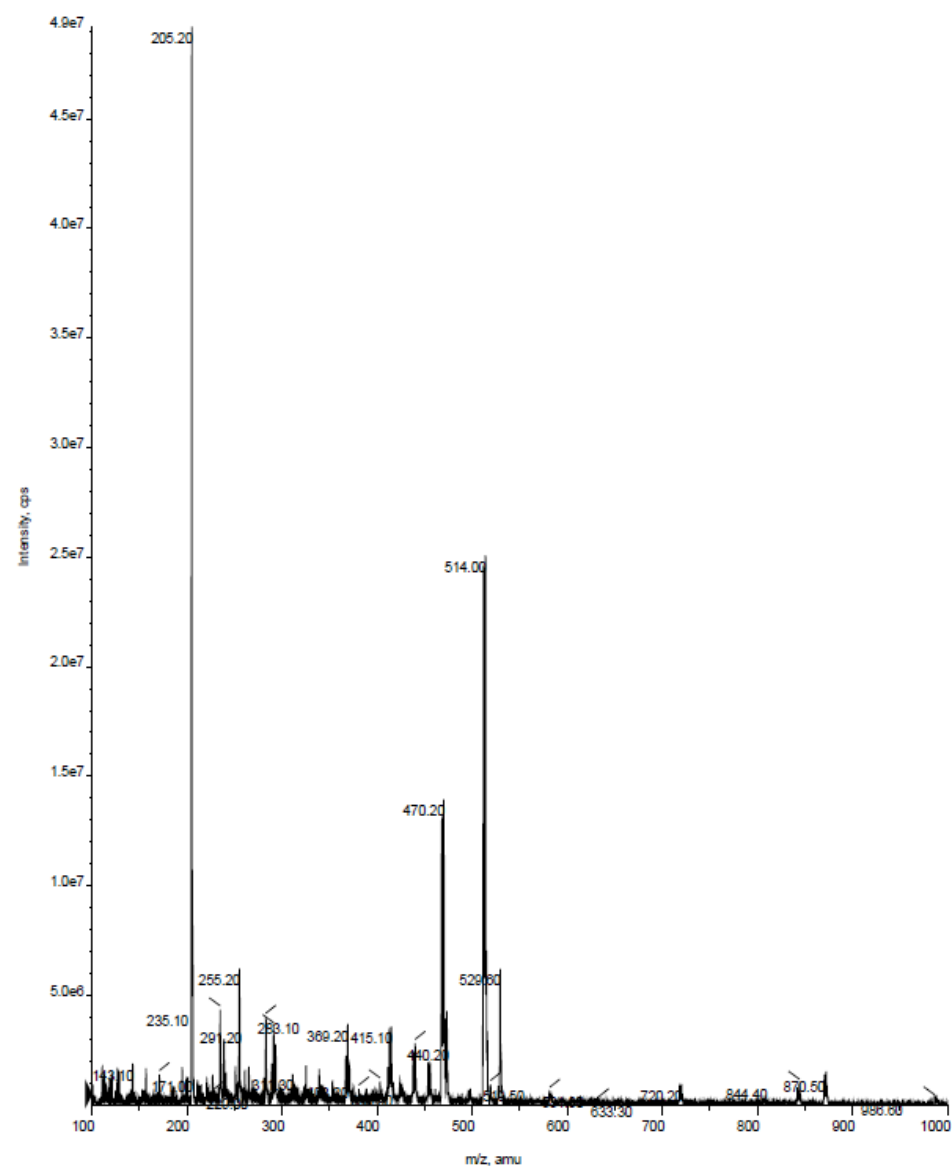

(Z)-2-(5-((3-(4-iodophenyl)-1-(*p*-tolyl)-1*H*-pyrazol-4-yl)methylene)-4-oxo-2-thioxothiazolidin-3-yl)acetic acid (3f)

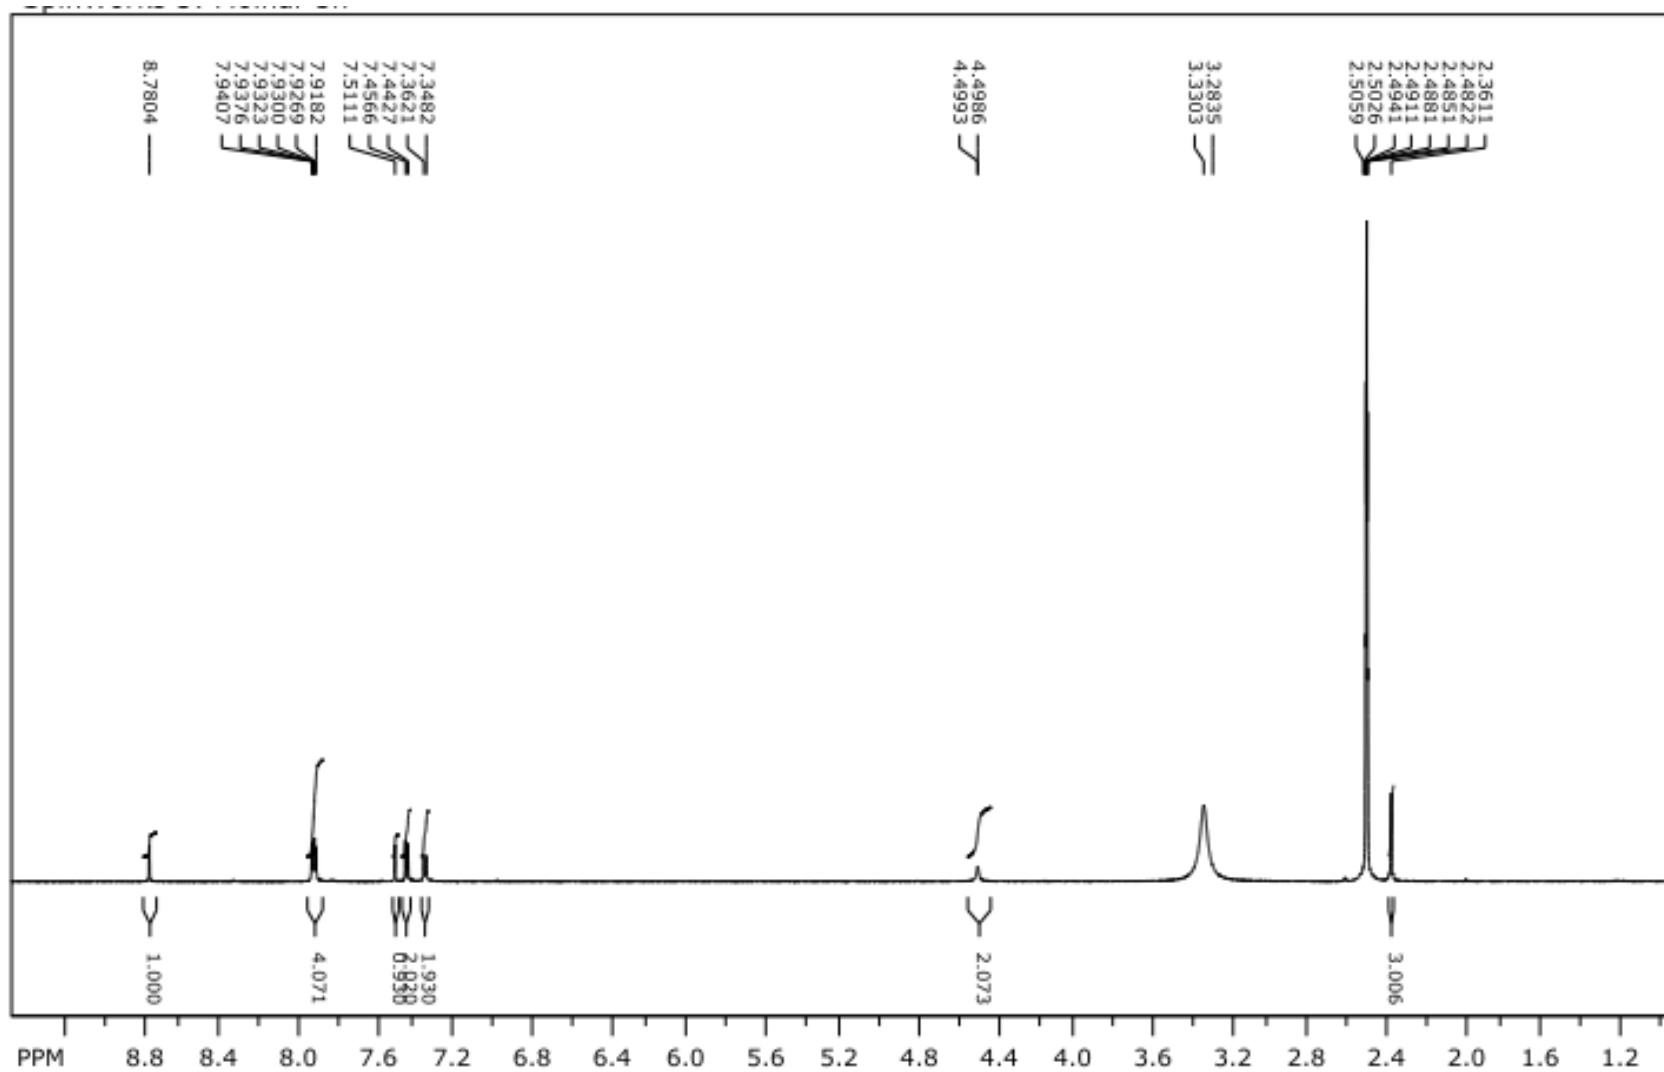

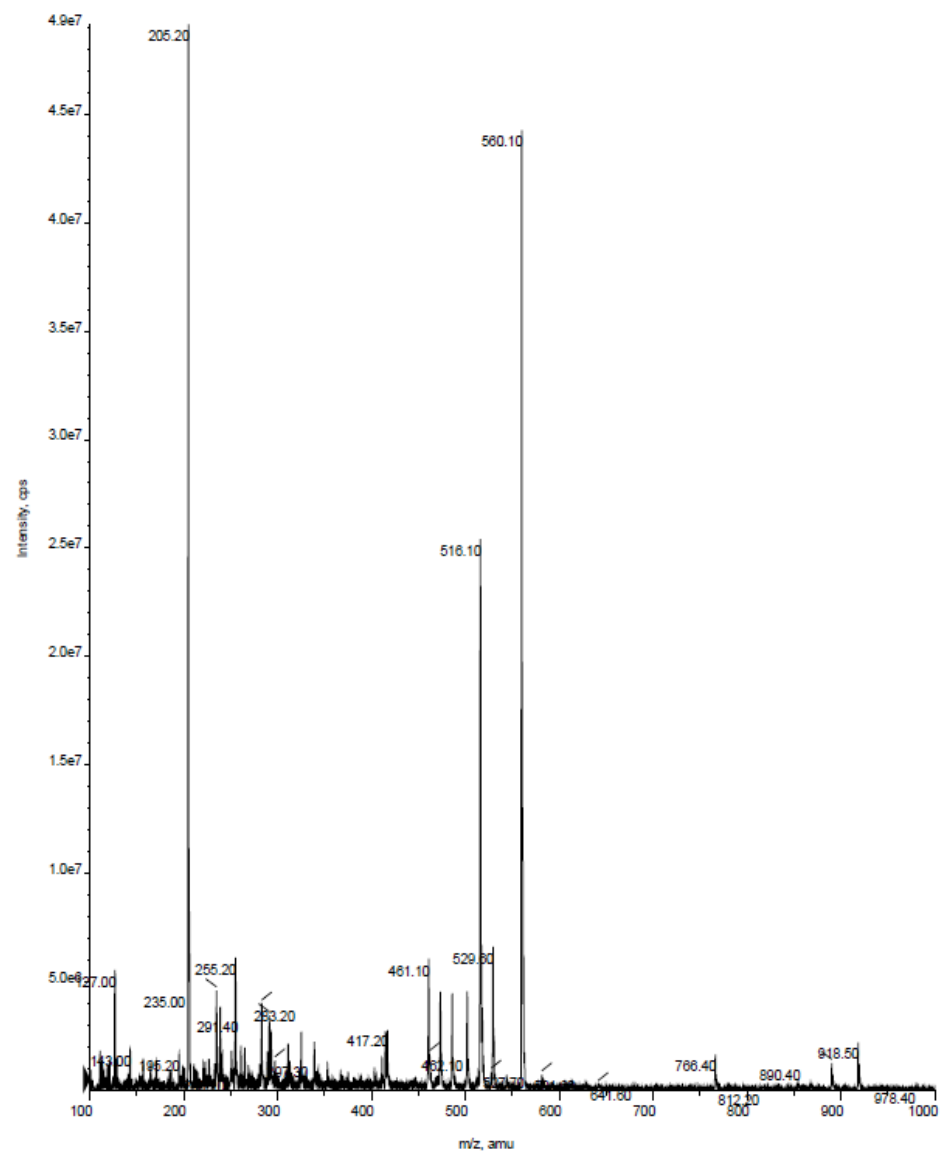

Supplement: s1 [file s1]
